# Supplementary material for: Numerical study of hydrodynamic and salinity transport processes in the Pink Beach wetlands of the Liao River estuary, China
Source: Copernicus journal article supplement (doi:10.5194/os-14-437-2018), 2018-06-11
Supplement: Supplementary file 1 [file Salinity.xls]

## Sheet: V1
2014.5.29	0	1899-12-31 11:00:00	32.5			32.5844
-30	1	1899-12-31 12:00:00	32.49			32.5917
大潮	2	1899-12-31 13:00:00	32.48			32.6082
	3	1899-12-31 14:00:00	32.49			32.6337
	4	1899-12-31 15:00:00	32.48			32.6634
	5	1899-12-31 16:00:00	32.48			32.6858
	6	1899-12-31 17:00:00	32.47			32.6932
	7	1899-12-31 18:00:00	32.48			32.6818
	8	1899-12-31 19:00:00	32.48			32.6516
	9	1899-12-31 20:00:00	32.49			32.6163
	10	1899-12-31 21:00:00	32.48			32.5889
	11	1899-12-31 22:00:00	32.5			32.571
	12	1899-12-31 23:00:00	32.48			32.5633
	13	0:00	32.5			32.5645
	14	1:00	32.48			32.5739
	15	1899-12-31 02:00:00	32.49			32.5899
	16	1899-12-31 03:00:00	32.48			32.6115
	17	1899-12-31 04:00:00	32.48			32.6349
	18	1899-12-31 05:00:00	32.47			32.6529
	19	1899-12-31 06:00:00	32.45			32.6583
	20	1899-12-31 07:00:00	32.48			32.6495
	21	1899-12-31 08:00:00	32.49			32.6303
	22	1899-12-31 09:00:00	32.48			32.6096
	23	1899-12-31 10:00:00	32.49			32.5959
	24	1899-12-31 11:00:00	32.5			32.5898
	25	1899-12-31 12:00:00	32.5			32.5911

## Sheet: V2
0	10:00	32.39		32.4012
1	1899-12-31 11:00:00	32.38		32.4021
2	1899-12-31 12:00:00	32.38		32.4049
3	1899-12-31 13:00:00	32.36		32.4117
4	1899-12-31 14:00:00	32.37		32.4234
5	1899-12-31 15:00:00	32.38		32.4371
6	1899-12-31 16:00:00	32.36		32.4491
7	1899-12-31 17:00:00	32.37		32.4549
8	1899-12-31 18:00:00	32.38		32.4503
9	1899-12-31 19:00:00	32.36		32.4355
10	1899-12-31 20:00:00	32.36		32.4174
11	1899-12-31 21:00:00	32.36		32.4018
12	1899-12-31 22:00:00	32.37		32.3904
13	1899-12-31 23:00:00	32.35		32.386
14	0:00	32.37		32.3883
15	1:00	32.38		32.3938
16	1899-12-31 02:00:00	32.35		32.402
17	1899-12-31 03:00:00	32.35		32.4131
18	1899-12-31 04:00:00	32.34		32.4241
19	1899-12-31 05:00:00	32.36		32.4316
20	1899-12-31 06:00:00	32.35		32.4324
21	1899-12-31 07:00:00	32.36		32.4256
22	1899-12-31 08:00:00	32.37		32.4145
23	1899-12-31 09:00:00	32.37		32.4045
24	1899-12-31 10:00:00	32.4		32.3991
25	1899-12-31 11:00:00	32.39		32.398
26	1899-12-31 12:00:00	32.39		32.3998

## Sheet: V3
0	10:00	32.38	30-32.8	32.2161
1	1899-12-31 11:00:00	32.33		32.223
2	1899-12-31 12:00:00	32.35		32.2195
3	1899-12-31 13:00:00	32.32		32.2062
4	1899-12-31 14:00:00	32.31		32.1944
5	15;00	32.32		32.1923
6	1899-12-31 16:00:00	32.31		32.1995
7	17;00	32.32		32.2066
8	1899-12-31 18:00:00	32.32		32.1971
9	1899-12-31 19:00:00	32.33		32.1662
10	1899-12-31 20:00:00	32.32		32.1424
11	1899-12-31 21:00:00	32.33		32.1448
12	1899-12-31 22:00:00	32.33		32.1696
13	1899-12-31 23:00:00	32.32		32.1977
14	1899-12-31	32.33		32.2121
15	1899-12-31 01:00:00	32.33		32.2086
16	1899-12-31 02:00:00	32.33		32.1942
17	1899-12-31 03:00:00	32.32		32.1829
18	1899-12-31 04:00:00	32.32		32.1801
19	1899-12-31 05:00:00	32.32		32.1807
20	1899-12-31 06:00:00	32.33		32.1787
21	1899-12-31 07:00:00	32.33		32.1709
22	1899-12-31 08:00:00	32.33		32.1665
23	1899-12-31 09:00:00	32.32		32.1781
24	1899-12-31 10:00:00	32.32		32.1937
25	1899-12-31 11:00:00	32.32		32.2054
26	1899-12-31 12:00:00	32.33		32.2093

## Sheet: V4
0	1899-12-31 11:00:00	32.28	32.1186
1	1899-12-31 12:00:00	32.31	32.1328
2	1899-12-31 13:00:00	32.28	32.1924
3	1899-12-31 14:00:00	32.3	32.2741
4	1899-12-31 15:00:00	32.31	32.3575
5	1899-12-31 16:00:00	32.3	32.4281
6	1899-12-31 17:00:00	32.29	32.4735
7	1899-12-31 18:00:00	32.29	32.4841
8	1899-12-31 19:00:00	32.31	32.4522
9	1899-12-31 20:00:00	32.32	32.3895
10	1899-12-31 21:00:00	32.3	32.3133
11	1899-12-31 22:00:00	32.31	32.2265
12	1899-12-31 23:00:00	32.32	32.1488
13	0:00	32.32	32.108
14	1899-12-31 01:00:00	32.32	32.1163
15	1899-12-31 02:00:00	32.32	32.1677
16	1899-12-31 03:00:00	32.29	32.2361
17	1899-12-31 04:00:00	32.26	32.2981
18	1899-12-31 05:00:00	32.28	32.3417
19	1899-12-31 06:00:00	32.27	32.3584
20	1899-12-31 07:00:00	32.28	32.3419
21	1899-12-31 08:00:00	32.31	32.2902
22	1899-12-31 09:00:00	32.32	32.2191
23	1899-12-31 10:00:00	32.32	32.1533
24	1899-12-31 11:00:00	32.32	32.1049
25	1899-12-31 12:00:00	32.33	32.0888
