# Supplementary material for: Numerical study of hydrodynamic and salinity transport processes in the Pink Beach wetlands of the Liao River estuary, China
Source: Copernicus journal article supplement (doi:10.5194/os-14-437-2018), 2018-06-11
Supplement: Supplementary file 3 [file V1.xls]

## Sheet: Velocity
39	0.21	0		0.0569335	0.0209643	0.0606706	θ
39	0.27	1		0.103354	0.121012	0.159141
36	0.29	2		0.117853	0.179932	0.215093
31	0.22	3		0.106063	0.195673	0.22257
32	0.22	4		0.0720315	0.161617	0.176942
272	0.06	5		0.0160471	0.094873	0.0962206
259	0.11	6		-0.0498294	0.0134154	0.0516037
252	0.15	7		-0.106605	-0.0720869	0.12869
250	0.2	8		-0.135464	-0.148323	0.200874
247	0.22	9		-0.124117	-0.174371	0.214033
240	0.18	10		-0.094698	-0.180243	0.203606
211	0.15	11		-0.0548676	-0.159343	0.168525
169	0.09	12		-0.0003315	-0.0886961	0.0886967
94	0.06	13		0.0561451	0.00204163	0.0561822
73	0.17	14		0.0987066	0.0942866	0.136503
37	0.27	15		0.111477	0.157271	0.192773
45	0.25	16		0.0944372	0.164722	0.189873
36	0.18	17		0.0623117	0.130867	0.144945
357	0.07	18		0.0155354	0.0691122	0.0708367
289	0.05	19		-0.0376715	-0.00115324	0.0376891
248	0.13	20		-0.0820671	-0.070084	0.10792
208	0.2	21		-0.101763	-0.128904	0.164231
197	0.2	22		-0.0853545	-0.144464	0.167795
202	0.14	23		-0.04957	-0.122564	0.132209
188	0.05	24		-0.00808246	-0.0772254	0.0776472
83	0.12	25		0.0435345	0.00311274	0.0436456
59	0.2	26		0.0885227	0.0944532	0.129451
						3.63837

## Sheet: Direction
0	1.19539	68.4908		39	0.5
1	0.685725	39.2891		39	1.5
2	0.558645	32.008		36	2.5
3	0.475267	27.2308		31	3.5
4	0.397335	22.7656		32	4.5
5	0.143814	8.23994		272	5.5
6	4.95544	283.926		259	6.5					℃
7	4.09645	234.709		252	7.5
8	3.86104	221.221		250	8.5
9	3.73943	214.254		247	9.5
10	3.60447	206.521		240	10.5
11	3.45198	197.784		211	11.5
12	3.12358	178.968		169	12.5
13	1.51173	86.6157		94	13.5
14	0.787205	45.1035		73	14.5
15	0.595466	34.1177		37	15.5
16	0.499281	28.6067		45	16.5
17	0.422735	24.2209		36	17.5
18	0.198258	11.3593		357	18.5
19	4.66022	267.011		289	19.5
20	3.98444	228.292		248	20.5
21	3.78891	217.089		208	21.5
22	3.65422	209.371		197	22.5
23	3.50475	200.807		202	23.5
24	3.22438	184.743		188	24.5
25	1.4761	84.5743		83	25.5
26	0.731815	41.9299		59	26.5
