# Supplementary material for: Numerical study of hydrodynamic and salinity transport processes in the Pink Beach wetlands of the Liao River estuary, China
Source: Copernicus journal article supplement (doi:10.5194/os-14-437-2018), 2018-06-11
Supplement: Supplementary file 5 [file V2.xls]

## Sheet: Velocity
0.19	0		-0.00237747	-0.0690713	0.0691122
0.16	1		0.0937985	0.00186545	0.093817
0.25	2		0.17699	0.0796871	0.194102
0.23	3		0.204945	0.122733	0.238885
0.28	4		0.176731	0.138489	0.224529
0.22	5		0.108455	0.12305	0.164024
0.19	6		0.0190274	0.0846404	0.0867527
0.14	7		-0.0835448	0.0342773	0.0903032
0.19	8		-0.192291	-0.0256013	0.193988
0.23	9		-0.244662	-0.0876863	0.259901
0.24	10		-0.219255	-0.115747	0.247932
0.26	11		-0.162743	-0.13282	0.210063
0.17	12		-0.0948191	-0.131657	0.162247
0.14	13		-0.00707959	-0.08775	0.0880351
0.11	14		0.0895923	-0.0184518	0.0914727
0.19	15		0.167267	0.0576236	0.176914
0.23	16		0.192051	0.105621	0.219179
0.23	17		0.157882	0.112761	0.194015
0.19	18		0.090779	0.0979033	0.133514
0.09	19		0.00729816	0.0601429	0.0605841
0.08	20		-0.0753831	0.0134942	0.0765814
0.2	21		-0.148895	-0.0348034	0.152908
0.21	22		-0.182009	-0.0816051	0.199466
0.23	23		-0.148114	-0.100018	0.178721
0.18	24		-0.0837842	-0.0947483	0.126479
0.08	25		-0.0131795	-0.0718573	0.0730559
0.1	26		0.0746381	-0.012663	0.0757047
					4.08229

## Sheet: Direction
0	146	3.15602	180.827
1	80	1.53079	87.7078
2	62	1.12772	64.6136
3	68	1.01128	57.9421
4	56	0.886292	50.7808
5	42	0.702676	40.2604
6	17	0.201166	11.526
7	287	5.08254	291.208
8	249	4.55997	261.267
9	226	4.34824	249.136
10	215	4.20665	241.023
11	222	4.00805	229.644
12	203	3.74583	214.62
13	177	3.20238	183.483
14	120	1.75376	100.483
15	85	1.219	69.8436
16	68	1.04784	60.0368
17	58	0.930693	53.3248
18	48	0.727815	41.7007
19	29	0.101004	5.7871
20	307	4.86997	279.029
21	261	4.46273	255.696
22	247	4.27088	244.703
23	228	4.09851	234.827
24	219	3.84579	220.348
25	194	3.30283	189.238
26	53	1.71886	98.4834
