# Supplementary material for: Numerical study of hydrodynamic and salinity transport processes in the Pink Beach wetlands of the Liao River estuary, China
Source: Copernicus journal article supplement (doi:10.5194/os-14-437-2018), 2018-06-11
Supplement: Supplementary file 7 [file V3.xls]

## Sheet: Direction
0	134	3.52342	201.877							℃	V6
1	86	1.95083	111.774
2	72	1.37093	78.5485
3	61	1.20882	69.2603
4	74	1.09042	62.4765
5	64	0.993883	56.9453
6	358	0.791881	45.3714
7	296	5.82408	333.695
8	246	4.73473	271.28
9	206	4.52728	259.394
10	215	4.42483	253.524
11	220	4.24937	243.471
12	217	4.00073	229.225
13	164	3.60197	206.378
14	138	2.30938	132.318
15	107	1.53689	88.0573
16	80	1.26756	72.6258
17	55	1.13888	65.253
18	63	0.986315	56.5117
19	45	0.729566	41.8011
20	289	5.33911	305.908
21	245	4.61641	264.501
22	221	4.44808	254.856
23	220	4.31251	247.089
24	211	4.08116	233.833
25	203	3.63356	208.188
26	84	2.18993	125.474

## Sheet: Velocity
0	0.19		-0.0303584	-0.0713956	0.077582
1	0.13		0.0658569	-0.0276683	0.0714329
2	0.28		0.165762	0.0304202	0.16853
3	0.33		0.220735	0.0790656	0.234468
4	0.36		0.224184	0.111797	0.250514
5	0.27		0.189252	0.118422	0.223249
6	0.17		0.106338	0.101391	0.146928
7	0.12		-0.0305244	0.0649518	0.0717668
8	0.33		-0.213739	0.00866616	0.213915
9	0.32		-0.316921	-0.0533727	0.321384
10	0.32		-0.291509	-0.0806479	0.302459
11	0.31		-0.225738	-0.107951	0.250222
12	0.35		-0.147038	-0.122583	0.191433
13	0.18		-0.0501036	-0.0965149	0.108745
14	0.15		0.057011	-0.0540689	0.0785729
15	0.18		0.150554	0.00230374	0.150572
16	0.27		0.196908	0.0576236	0.205166
17	0.29		0.189562	0.0832683	0.207044
18	0.21		0.139794	0.0889295	0.165683
19	0.12		0.0631024	0.0681815	0.0929012
20	0.07		-0.0433422	0.0326426	0.0542594
21	0.21		-0.168181	-0.013113	0.168691
22	0.23		-0.229858	-0.0577346	0.236998
23	0.24		-0.189861	-0.0763725	0.204646
24	0.19		-0.113738	-0.0802542	0.139202
25	0.08		-0.0408197	-0.0728372	0.0834955
26	0.09		0.0470066	-0.034785	0.0584775
