# Supplementary material for: Numerical study of hydrodynamic and salinity transport processes in the Pink Beach wetlands of the Liao River estuary, China
Source: Copernicus journal article supplement (doi:10.5194/os-14-437-2018), 2018-06-11
Supplement: Supplementary file 9 [file V4.xls]

## Sheet: Direction
0	86	2.15915	123.71							℃
1	62	1.01632	58.2308
2	58	0.871927	49.9577
3	48	0.758736	43.4724
4	42	0.652797	37.4025
5	28	0.494569	28.3367
6	275	6.21271	355.962
7	233	4.564	261.498
8	239	4.19297	240.239
9	234	4.0622	232.747
10	224	3.91507	224.317
11	223	3.78661	216.957
12	209	3.67269	210.43
13	165	2.96627	169.955
14	77	1.08076	61.923
15	62	0.854542	48.9617
16	50	0.747177	42.8101
17	42	0.611909	35.0598
18	33	0.416674	23.8737
19	338	5.82312	333.64
20	256	4.37864	250.878
21	249	4.08948	234.31
22	244	3.95219	226.444
23	226	3.7982	217.621
24	221	3.59773	206.135
25	80	2.70584	155.033
26	38	1.09218	62.5773

## Sheet: Velocity
0	0.16		0.0410844	-0.0284962	0.0499996
1	0.37		0.161314	0.0958578	0.187646
2	0.5		0.232169	0.187957	0.298714
3	0.47		0.23776	0.241755	0.33908
4	0.35		0.194508	0.244936	0.312773
5	0.19		0.112472	0.19981	0.22929
6	0.08		-0.00577288	0.111385	0.111534
7	0.22		-0.161252	-0.0211149	0.162629
8	0.32		-0.262017	-0.143484	0.298732
9	0.4		-0.269911	-0.197567	0.334492
10	0.34		-0.236471	-0.233458	0.332297
11	0.32		-0.183171	-0.234365	0.297453
12	0.28		-0.100903	-0.164837	0.193268
13	0.12		0.00910961	-0.0578962	0.0586085
14	0.21		0.121856	0.0621914	0.136809
15	0.34		0.186818	0.156626	0.243788
16	0.39		0.187748	0.195353	0.270947
17	0.28		0.139329	0.190968	0.236392
18	0.17		0.0660871	0.1423	0.156897
19	0.08		-0.0286142	0.0605932	0.0670098
20	0.23		-0.137274	-0.0448199	0.144406
21	0.29		-0.204424	-0.141201	0.248449
22	0.28		-0.190559	-0.174658	0.258492
23	0.24		-0.136059	-0.169976	0.217724
24	0.18		-0.0702173	-0.136662	0.153646
25	0.08		0.0212998	-0.0480339	0.0525446
26	0.29		0.130561	0.0647413	0.145731
