# Supplementary material for: Numerical study of hydrodynamic and salinity transport processes in the Pink Beach wetlands of the Liao River estuary, China
Source: Copernicus journal article supplement (doi:10.5194/os-14-437-2018), 2018-06-11
Supplement: Supplementary file 11 [file V1.xls]

## Sheet: Velocity
0	0.07			0.0386891	-0.00581636	0.0391239
1	0.14			0.102189	0.1387	0.17228
2	0.29			0.124032	0.222254	0.254521
3	0.35			0.109777	0.248432	0.271605
4	0.17			0.0797818	0.210152	0.224787
5	0.23			0.0226492	0.133951	0.135852
6	0.1			-0.0527111	0.033034	0.062207
7	0.19			-0.121159	-0.0671491	0.138523
8	0.25			-0.164873	-0.167801	0.235245				℃
9	0.25			-0.151171	-0.206942	0.256277
10	0.27			-0.118871	-0.214328	0.245085
11	0.25			-0.0766228	-0.206556	0.22031
12	0.13			-0.0127068	-0.128406	0.129033
13	0.11			0.0591765	-0.0169923	0.0615678
14	0.07			0.118853	0.101129	0.156055
15	0.13			0.142354	0.1835	0.232243
16	0.2			0.127744	0.197662	0.235348
17	0.29			0.0954678	0.152308	0.179755
18	0.09			0.0467677	0.0827568	0.0950574
19	0.07			-0.0147322	-0.0118	0.0188753
20	0.19			-0.071243	-0.0931954	0.117307
21	0.23			-0.103276	-0.166536	0.19596
22	0.23			-0.0915827	-0.188368	0.209451
23	0.19			-0.0515537	-0.149651	0.158282
24	0.07			-0.00274037	-0.0816268	0.0816728
25	0.12			0.0623394	0.042925	0.0756885

## Sheet: Direction
0	230	1.69714	97.239
1	62	0.614037	35.1817							℃
2	25	0.487859	27.9523
3	27	0.394763	22.6183
4	5	0.340982	19.5368
5	31	0.144416	8.27443
6	121	5.25248	300.945
7	228	4.18478	239.77
8	239	3.8976	223.316
9	236	3.75196	214.971
10	223	3.62725	207.826
11	214	3.47566	199.141
12	150	3.21847	184.405
13	106	1.8286	104.771
14	62	0.844576	48.3906
15	34	0.638682	36.5938
16	29	0.552445	31.6528
17	27	0.5382	30.8366
18	338	0.490959	28.1299
19	238	3.98459	228.3
20	217	3.77327	216.192
21	210	3.67565	210.599
22	207	3.57311	204.724
23	216	3.45203	197.787
24	200	3.15395	180.708
25	27	0.945661	54.1824
