# Supplementary material for: Numerical study of hydrodynamic and salinity transport processes in the Pink Beach wetlands of the Liao River estuary, China
Source: Copernicus journal article supplement (doi:10.5194/os-14-437-2018), 2018-06-11
Supplement: Supplementary file 13 [file V2.xls]

## Sheet: Velocity
0	0.24	234		-0.0539581	-0.0977422	0.111647
1	0.14	253		0.0470116	-0.0101358	0.0480918
2	0.16	57		0.155988	0.110743	0.191302
3	0.3	38		0.211937	0.172936	0.27354
4	0.34	42		0.191255	0.189855	0.269487
5	0.31	39		0.135064	0.17489	0.220972
6	0.26	21		0.0447253	0.13016	0.13763
7	0.16	332		-0.0674636	0.0634155	0.0925898
8	0.19	276		-0.206072	-0.0111975	0.206376
9	0.27	247		-0.28829	-0.0974249	0.304307
10	0.31	245		-0.257915	-0.139294	0.293126
11	0.33	236		-0.201834	-0.163595	0.259808
12	0.3	228		-0.132271	-0.173251	0.217971
13	0.21	212		-0.0329748	-0.123719	0.128038
14	0.17	174		0.0866791	-0.0398133	0.0953854
15	0.16	81		0.193461	0.0589803	0.202252
16	0.28	53		0.240669	0.118498	0.26826
17	0.29	53		0.209351	0.123283	0.242954
18	0.21	57		0.141143	0.0957781	0.170572
19	0.09	314		0.0410363	0.0495972	0.0643728
20	0.1	285		-0.0597296	-0.0165852	0.0619895
21	0.23	256		-0.156023	-0.0719279	0.171805
22	0.26	237		-0.204185	-0.124783	0.239295
23	0.28	229		-0.172436	-0.144635	0.225063
24	0.22	224		-0.102883	-0.122577	0.160031
25	0.13	195		-0.0206484	-0.0744792	0.0772885
26	0.11	71		0.0863721	0.0305591	0.0916188

## Sheet: Direction
0	234	3.62601	207.755
1	253	1.76314	101.02
2	57	0.933451	53.4828
3	38	0.86653	49.6485
4	42	0.769328	44.0792
5	39	0.637919	36.5501
6	21	0.310856	17.8107
7	332	5.4473	312.107										℃
8	276	4.63821	265.75
9	247	4.3665	250.182
10	245	4.19726	240.485
11	236	4.01139	229.836
12	228	3.77381	216.223
13	212	3.3819	193.769
14	174	1.98194	113.557
15	81	1.25473	71.8907
16	53	1.09326	62.6392
17	53	1.01867	58.3655
18	57	0.954753	54.7033
19	314	0.671349	38.4655
20	285	4.42128	253.321
21	256	4.26037	244.101
22	237	4.1439	237.428
23	229	3.99459	228.873
24	224	3.82	218.87
25	195	3.39192	194.343
26	71	1.21045	69.3537
