# Supplementary material for: Numerical study of hydrodynamic and salinity transport processes in the Pink Beach wetlands of the Liao River estuary, China
Source: Copernicus journal article supplement (doi:10.5194/os-14-437-2018), 2018-06-11
Supplement: Supplementary file 15 [file V3.xls]

## Sheet: Velocity
0	0.21	228		-0.0879064	-0.0819743	0.120197
1	0.09	332		0.0134904	-0.0342422	0.0368038
2	0.1	85		0.138885	0.046456	0.146449
3	0.34	55		0.231142	0.111403	0.256588
4	0.34	67		0.256411	0.150842	0.297489
5	0.32	53		0.256803	0.163144	0.304243
6	0.22	46		0.192022	0.143592	0.239773
7	0.12	358		0.0362546	0.0911464	0.0980921
8	0.22	282		-0.206553	0.0216209	0.207681
9	0.32	259		-0.373438	-0.0615666	0.378479
10	0.25	252		-0.356338	-0.0997965	0.370049
11	0.22	242		-0.288031	-0.135793	0.318436
12	0.31	245		-0.208754	-0.161297	0.263809
13	0.32	217		-0.0949043	-0.132991	0.163381
14	0.13	136		0.0418761	-0.0807981	0.0910052				℃
15	0.26	82		0.163447	-0.0134329	0.163998
16	0.3	80		0.235185	0.0539099	0.241285
17	0.31	78		0.230127	0.0840597	0.244999
18	0.32	62		0.184351	0.0846597	0.202861
19	0.14	64		0.0881718	0.0579492	0.10551
20	0.09	324		-0.048438	0.00495915	0.0486912
21	0.23	268		-0.205852	-0.0433921	0.210376
22	0.24	250		-0.277843	-0.0868746	0.291108
23	0.22	247		-0.224669	-0.102742	0.247047
24	0.2	229		-0.13717	-0.0905576	0.164366
25	0.17	205		-0.0543646	-0.069323	0.0880976
26	0.13	88		0.0548924	-0.00890238	0.0556096

## Sheet: Direction
0	228	3.94386	225.967
1	332	2.7452	157.288
2	85	1.22991	70.4687
3	55	1.10391	63.2494
4	67	1.02138	58.5208
5	53	0.987042	56.5533
6	46	0.910711	52.1799
7	358	0.360387	20.6487
8	282	4.79843	274.93
9	259	4.53081	259.596
10	252	4.42173	253.346
11	242	4.25496	243.791
12	245	4.03794	231.357
13	217	3.74325	214.472
14	136	2.64332	151.451
15	82	1.63389	93.615
16	80	1.32714	76.0395
17	78	1.20254	68.9005
18	62	1.12235	64.3059
19	64	0.97143	55.6588
20	324	4.79638	274.812
21	268	4.48637	257.05
22	250	4.39145	251.612
23	247	4.26624	244.438
24	229	4.11175	235.586
25	205	3.78747	217.006
26	88	1.70983	97.966
