# Supplementary material for: Numerical study of hydrodynamic and salinity transport processes in the Pink Beach wetlands of the Liao River estuary, China
Source: Copernicus journal article supplement (doi:10.5194/os-14-437-2018), 2018-06-11
Supplement: Supplementary file 17 [file V4.xls]

## Sheet: Velocity
0	0.09	249		-0.0254824	-0.0408387	0.0481368
1	0.19	80		0.131882	0.133165	0.187419
2	0.38	57		0.248556	0.259985	0.359684
3	0.48	54		0.2774	0.325788	0.427889
4	0.33	50		0.259452	0.340928	0.428424
5	0.26	42		0.184577	0.289513	0.343346
6	0.14	348		0.0534252	0.174416	0.182415
7	0.27	92		-0.149735	0.00368651	0.14978
8	0.34	256		-0.303222	-0.166835	0.346089
9	0.43	242		-0.320105	-0.2338	0.396396
10	0.36	241		-0.291653	-0.284155	0.407192
11	0.32	236		-0.247412	-0.305319	0.392979
12	0.27	235		-0.156803	-0.227344	0.276175
13	0.2	237		-0.0201069	-0.0955481	0.0976408
14	0.1	277		0.128106	0.0513968	0.138032
15	0.32	56		0.226847	0.167019	0.2817			℃
16	0.32	47		0.235332	0.207183	0.313538
17	0.23	40		0.187028	0.19395	0.269437
18	0.2	36		0.0934793	0.128644	0.159021
19	0.13	287		-0.0290505	0.0176373	0.0339854
20	0.28	247		-0.174662	-0.105413	0.204007
21	0.36	235		-0.261996	-0.209178	0.335257
22	0.34	224		-0.247164	-0.233847	0.340256
23	0.27	215		-0.18631	-0.199776	0.27317
24	0.13	200		-0.102248	-0.130335	0.165656
25	0.1	104		0.0269601	0.0144305	0.0305792

## Sheet: Direction
0	249	3.68069	210.888
1	80	0.762227	43.6724
2	57	0.744573	42.6609
3	54	0.686992	39.3617
4	50	0.632156	36.2199
5	42	0.54917	31.4651
6	348	0.278778	15.9728
7	92	4.7188	270.367
8	256	4.19108	240.131
9	242	4.06325	232.807
10	241	3.9217	224.697
11	236	3.80426	217.968
12	235	3.72693	213.537
13	237	3.33014	190.803
14	277	1.17087	67.0859
15	56	0.917825	52.5875
16	47	0.830601	47.5899
17	40	0.748905	42.9091
18	36	0.610013	34.9512
19	287	5.23969	300.212
20	247	4.15108	237.839
21	235	4.02031	230.347
22	224	3.93636	225.537
23	215	3.8738	221.952
24	200	3.78841	217.06
25	104	1.06083	60.7811
