# Supplementary material for: Numerical study of hydrodynamic and salinity transport processes in the Pink Beach wetlands of the Liao River estuary, China
Source: Copernicus journal article supplement (doi:10.5194/os-14-437-2018), 2018-06-11
Supplement: Supplementary file 19 [file H1.xls]

## Sheet: Sheet1
0.8	0	0.809026
0.13	1	0.249724
-0.44	2	-0.326793
-0.91	3	-0.783081
-1.17	4	-1.01582
-1.2	5	-0.99934
-0.9	6	-0.751036
-0.4	7	-0.360792
0.12	8	0.0557386
0.5	9	0.394432
0.64	10	0.553032
0.62	11	0.514762
0.32	12	0.279747
-0.14	13	-0.0963556
-0.76	14	-0.489073
-1.07	15	-0.797782
-1.18	16	-0.933481
-0.88	17	-0.827599
-0.28	18	-0.504553
0.38	19	-0.0303463
1.04	20	0.494284
1.56	21	0.941058
1.77	22	1.22428
1.73	23	1.28082
1.37	24	1.0781
0.79	25	0.660248
0.1	26	0.149073
-0.5	27	-0.372486
-0.95	28	-0.781074
-1.27	29	-0.981126
-1.29	30	-0.949006
-1.03	31	-0.700709
-0.52	32	-0.31728
0.08	33	0.0941767
0.42	34	0.43484
0.66	35	0.608444
0.67	36	0.59672
0.45	37	0.391764
-0.02	38	0.0441551
-0.52	39	-0.33381
-0.8	40	-0.649055
-0.97	41	-0.814254
-0.81	42	-0.762162
-0.36	43	-0.506011
0.35	44	-0.101445
0.98	45	0.362343
1.36	46	0.767602
1.64	47	1.02985
1.61	48	1.0905
1.27	49	0.919928
0.72	50	0.542848
0.17	51	0.0719997
-0.45	52	-0.408985
-0.81	53	-0.790185
-1	54	-0.97476
-0.96	55	-0.933181
-0.71	56	-0.68012
-0.27	57	-0.286451
0.39	58	0.144138
0.77	59	0.511819
0.98	60	0.721033
1.12	61	0.744042
0.93	62	0.566318
0.47	63	0.227077
-0.01	64	-0.163413
-0.44	65	-0.514884
-0.71	66	-0.736809
-0.69	67	-0.75463
-0.46	68	-0.567023
-0.1	69	-0.220687
0.43	70	0.203965
0.96	71	0.593252
1.34	72	0.855395
1.42	73	0.932888
1.18	74	0.793623
0.74	75	0.449931
0.2	76	0.00147331
-0.4	77	-0.459798
-0.8	78	-0.82904
-1.04	79	-1.00559
-1.06	80	-0.948637
-0.78	81	-0.673993
-0.24	82	-0.247225
0.38	83	0.226573
0.92	84	0.638976
1.18	85	0.890239
1.26	86	0.942582
1.06	87	0.773923
0.63	88	0.414213
0.06	89	-0.0153405
-0.36	90	-0.425636
-0.74	91	-0.716991
-0.84	92	-0.801131
-0.72	93	-0.667557
-0.32	94	-0.355676
0.04	95	0.0556414
0.66	96	0.449492
1.03	97	0.725081
1.18	98	0.816766
1.03	99	0.694838
0.64	100	0.365482
0.04	101	-0.0827585
-0.5	102	-0.540514
-0.9	103	-0.904516
-1.12	104	-1.068
-1.12	105	-0.978526
-0.81	106	-0.659219
-0.32	107	-0.177071
0.4	108	0.355354
0.96	109	0.816592
1.32	110	1.10172
1.46	111	1.16316
1.24	112	0.97437
0.73	113	0.565418
0.23	114	0.0789664
-0.28	115	-0.399804
-0.7	116	-0.754705
-0.87	117	-0.884916
-0.8	118	-0.779004
-0.48	119	-0.471982
0.08	120	-0.0519256
0.59	121	0.356383
0.94	122	0.646184
1.06	123	0.736988
0.89	124	0.610864
0.42	125	0.270649
-0.12	126	-0.194339
-0.68	127	-0.655983
-1.06	128	-1.00965
-1.21	129	-1.14262
-1.1	130	-0.997381
-0.68	131	-0.611757
-0.06	132	-0.0594897
0.69	133	0.532483
1.26	134	1.03024
1.66	135	1.32707
1.71	136	1.36918
1.39	137	1.12416
0.84	138	0.651639
0.18	139	0.100242
-0.4	140	-0.441024
-0.84	141	-0.834863
-1.08	142	-0.98023
-1.11	143	-0.869874
-0.79	144	-0.541618
-0.24	145	-0.100839
0.28	146	0.319796
0.66	147	0.610053
0.84	148	0.678706
0.66	149	0.523707
0.28	150	0.152128
-0.34	151	-0.336447
-0.87	152	-0.79747
-1.22	153	-1.12408
-1.36	154	-1.20185
-1.16	155	-0.978317
-0.56	156	-0.513159
0.2	157	0.110064
0.94	158	0.745834
1.52	159	1.25485
1.82	160	1.53176
1.8	161	1.52075
1.42	162	1.1907
0.76	163	0.656619
0.09	164	0.0435784
-0.36	165	-0.536846
-0.86	166	-0.933222
-1.05	167	-1.05942
-0.98	168	-0.913364
-0.62	169	-0.548552
-0.13	170	-0.0875607
0.44	171	0.33172
0.75	172	0.598024
0.8	173	0.622428
0.64	174	0.41911
0.16	175	0.00534073
-0.45	176	-0.499897
-0.97	177	-0.944282
-1.15	178	-1.22033
-1.24	179	-1.21711
-0.84	180	-0.901738
-0.2	181	-0.357159
0.52	182	0.321519
1.06	183	0.971796
1.55	184	1.45766
1.91	185	1.67988
1.93	186	1.58613
1.29	187	1.1623
0.59	188	0.575162
-0.08	189	-0.0795996
-0.61	190	-0.662846
-0.97	191	-1.02311
-1.17	192	-1.09778
-1.06	193	-0.895482
-0.58	194	-0.492234
-0.04	195	-0.0235395
0.17	196	0.373156
0.43	197	0.588842
0.74	198	0.552169
0.37	199	0.290466
0.14	200	-0.162694
-0.6	201	-0.664983
-1.07	202	-1.06909
-1.27	203	-1.27042
-1.14	204	-1.16657
-0.66	205	-0.761435
0.06	206	-0.150704
0.86	207	0.551862
1.56	208	1.18112
1.93	209	1.60625
2	210	1.74457
1.65	211	1.54313
0.98	212	1.04699
0.32	213	0.420098
-0.31	214	-0.246006
-0.82	215	-0.78884
-1.08	216	-1.08058
-1.1	217	-1.08157
-0.8	218	-0.816234
-0.26	219	-0.385908
0.28	220	0.0693214
0.66	221	0.422178
0.86	222	0.563912
0.77	223	0.460917
0.42	224	0.141744
-0.24	225	-0.333937
-0.75	226	-0.806143
-1.15	227	-1.14663
-1.28	228	-1.25292
-0.99	229	-1.04334
-0.44	230	-0.565244
0.38	231	0.0849474
1.14	232	0.772895
1.7	233	1.34117
1.94	234	1.67681
1.95	235	1.71068
1.47	236	1.40018
0.72	237	0.858494
-0.02	238	0.214691
-0.65	239	-0.423375
-0.95	240	-0.890145
-1.05	241	-1.0907
-1.06	242	-1.00917
-0.88	243	-0.689777
-0.26	244	-0.251913
0.36	245	0.167375
0.58	246	0.457304
0.65	247	0.515314
0.51	248	0.350914
0.04	249	-0.0129172
-0.52	250	-0.482915
-0.96	251	-0.899718
-1.23	252	-1.15814
-1.24	253	-1.15932
-0.94	254	-0.858589
-0.28	255	-0.33406
0.56	256	0.319002
1.41	257	0.953233
1.81	258	1.42888
2.03	259	1.65738
1.71	260	1.5797
1.15	261	1.1825
0.53	262	0.622799
-0.1	263	-0.00916282
-0.67	264	-0.580843
-1.05	265	-0.948475
-1.15	266	-1.05091
-0.96	267	-0.891937
-0.48	268	-0.538438
0.11	269	-0.115613
0.47	270	0.252672
0.65	271	0.462785
0.67	272	0.448381
0.39	273	0.233519
-0.13	274	-0.152018
-0.69	275	-0.584733
-1.01	276	-0.930159
-1.31	277	-1.0973
-1.15	278	-0.999152
-0.66	279	-0.637358
0.09	280	-0.097964
0.95	281	0.519357
1.45	282	1.0679
1.83	283	1.43458
1.9	284	1.55091
1.51	285	1.36828
0.88	286	0.926303
0.19	287	0.369171
-0.31	288	-0.218042
-0.81	289	-0.698401
-1.09	290	-0.959371
-1.02	291	-0.970963
-0.76	292	-0.750581
-0.29	293	-0.386691
0.23	294	0.00284528
0.62	295	0.312421
0.73	296	0.44259
0.65	297	0.377357
0.23	298	0.126171
-0.3	299	-0.249969
-0.85	300	-0.625189
-1.09	301	-0.894094
-1.11	302	-0.972942
-0.79	303	-0.79926
-0.13	304	-0.41226
0.47	305	0.110495
1.13	306	0.659403
1.65	307	1.10328
1.93	308	1.36301
1.75	309	1.37416
1.35	310	1.11277
0.72	311	0.661484
0.1	312	0.129903
-0.41	313	-0.389288
-0.78	314	-0.768399
-0.97	315	-0.931446
-0.83	316	-0.867127
-0.55	317	-0.60938
-0.2	318	-0.253058
0.45	319	0.0959224
0.68	320	0.343949
0.81	321	0.4164
0.59	322	0.315783
0.15	323	0.0531395
-0.39	324	-0.289588
-0.81	325	-0.603355
-1.01	326	-0.800878
-0.91	327	-0.809206
-0.51	328	-0.596124
0.07	329	-0.215641
0.75	330	0.261474
1.23	331	0.723109
1.61	332	1.06598
1.71	333	1.22718
1.41	334	1.15617
0.79	335	0.852812
0.25	336	0.414842
-0.3	337	-0.0722293
-0.81	338	-0.512688
-1.11	339	-0.797263
-1.15	340	-0.881277
-0.97	341	-0.760807
-0.63	342	-0.485987
-0.07	343	-0.146729
0.31	344	0.165563
0.53	345	0.361917
0.53	346	0.403922
0.32	347	0.284874
-0.11	348	0.0331652
-0.57	349	-0.268145
-0.89	350	-0.529063
-1.01	351	-0.673254
-0.83	352	-0.641675
-0.39	353	-0.42545
0.19	354	-0.0756226
0.88	355	0.338061
1.28	356	0.712315
1.6	357	0.970147
1.58	358	1.05276
1.15	359	0.93022
0.65	360	0.618317
0.1	361	0.206761
-0.32	362	-0.227586
-0.72	363	-0.592547
-0.91	364	-0.802794
-0.91	365	-0.827058
-0.63	366	-0.67029
-0.15	367	-0.388752
0.33	368	-0.0631073
0.65	369	0.222803
0.79	370	0.39322
0.75	371	0.423893
0.39	372	0.303619
-0.05	373	0.0728472
-0.43	374	-0.196796
-0.71	375	-0.424076
-0.75	376	-0.543809
-0.57	377	-0.506641
-0.17	378	-0.313754
0.31	379	-0.00910818
0.89	380	0.339223
1.31	381	0.643657
1.51	382	0.838187
1.37	383	0.872021
0.95	384	0.72702
0.51	385	0.425735
-0.03	386	0.0455933
-0.51	387	-0.340138
-0.86	388	-0.64657
-1.03	389	-0.80392
-0.99	390	-0.785901
-0.71	391	-0.604318
-0.29	392	-0.31327
0.17	393	0.0114948
0.47	394	0.290611
0.59	395	0.459784
0.55	396	0.492203
0.23	397	0.380588
-0.11	398	0.162291
-0.51	399	-0.0962665
-0.75	400	-0.318642
-0.81	401	-0.446515
-0.69	402	-0.431234
-0.31	403	-0.276359
0.09	404	-0.0178358
0.58	405	0.280611
0.91	406	0.540043
1.09	407	0.699396
1.03	408	0.712355
0.6	409	0.565546
0.2	410	0.280035
-0.32	411	-0.0740867
-0.75	412	-0.426101
-1.02	413	-0.695418
-1.12	414	-0.81753
-0.93	415	-0.767849
-0.59	416	-0.559904
-0.25	417	-0.246367
0.17	418	0.0978444
0.49	419	0.392175
0.68	420	0.576399
0.63	421	0.616892
0.43	422	0.50781
0.05	423	0.280327
-0.35	424	0.00515105
-0.57	425	-0.244666
-0.6	426	-0.40688
-0.42	427	-0.429671
-0.21	428	-0.313103
0.18	429	-0.0868722
0.61	430	0.187415
0.97	431	0.430743
1.09	432	0.581246
0.94	433	0.592653
0.68	434	0.450496
0.22	435	0.17444
-0.33	436	-0.16946
-0.69	437	-0.506788
-0.98	438	-0.757578
-1.04	439	-0.85423
-0.91	440	-0.771171
-0.53	441	-0.524094
-0.05	442	-0.168192
0.45	443	0.216849
0.87	444	0.54286
1.15	445	0.74759
1.13	446	0.791257
0.85	447	0.664974
0.41	448	0.398664
0.05	449	0.0777308
-0.31	450	-0.226233
-0.47	451	-0.438512
-0.48	452	-0.499873
-0.33	453	-0.407323
0.05	454	-0.189126
0.41	455	0.0898366
0.65	456	0.343439
0.89	457	0.502126
0.8	458	0.519474
0.53	459	0.37449
0.26	460	0.0922618
-0.17	461	-0.261093
-0.61	462	-0.601397
-0.87	463	-0.843522
-0.97	464	-0.91325
-0.85	465	-0.783842
-0.37	466	-0.478478
0.19	467	-0.0589608
0.82	468	0.382382
1.19	469	0.746294
1.35	470	0.966057
1.25	471	0.994737
0.85	472	0.821082
0.37	473	0.487761
-0.15	474	0.0968043
-0.54	475	-0.275509
-0.75	476	-0.537878
-0.76	477	-0.624106
-0.57	478	-0.531397
-0.21	479	-0.291994
0.2	480	0.0161544
0.51	481	0.297439
0.83	482	0.469487
0.8	483	0.484438
0.46	484	0.322762
0.1	485	0.012062
-0.37	486	-0.367477
-0.77	487	-0.720365
-1.03	488	-0.952698
-1.05	489	-0.983127
-0.83	490	-0.787965
-0.45	491	-0.404514
0.34	492	0.0942189
0.95	493	0.596602
1.35	494	0.992329
1.49	495	1.20942
1.39	496	1.19647
1.07	497	0.941638
0.51	498	0.524101
-0.02	499	0.0507674
-0.44	500	-0.391176
-0.77	501	-0.68677
-0.87	502	-0.773525
-0.73	503	-0.65214
-0.33	504	-0.365922
0.08	505	-0.0133743
0.44	506	0.299602
0.62	507	0.477392
0.68	508	0.4726
0.47	509	0.27498
0.01	510	-0.0830745
-0.57	511	-0.49855
-1.01	512	-0.862416
-1.17	513	-1.07385
-1.09	514	-1.04535
-0.71	515	-0.76461
0.13	516	-0.288954
0.71	517	0.292962
1.13	518	0.848041
1.59	519	1.25744
1.69	520	1.44587
1.37	521	1.36196
0.97	522	1.00014
0.34	523	0.495876
-0.31	524	-0.0621867
-0.83	525	-0.555889
-1.09	526	-0.856709
-1.17	527	-0.916035
-1.02	528	-0.738176
-0.66	529	-0.390246
-0.06	530	0.00885106
0.33	531	0.344696
0.55	532	0.510868
0.49	533	0.466289
0.26	534	0.213958
-0.29	535	-0.201635
-0.85	536	-0.651922
-1.2	537	-1.01545
-1.37	538	-1.18742
-1.15	539	-1.0792
-0.51	540	-0.700659
0.13	541	-0.128898
0.87	542	0.525271
1.47	543	1.11188
1.79	544	1.50928
1.85	545	1.6409
1.49	546	1.45376
0.82	547	0.988956
0.21	548	0.398782
-0.36	549	-0.228304
-0.87	550	-0.74124
-1.17	551	-1.01767
-1.17	552	-1.02042
-0.86	553	-0.768042
-0.47	554	-0.356819
0.08	555	0.0794722
0.44	556	0.419315
0.59	557	0.551693
0.46	558	0.450446
0.05	559	0.13141
-0.57	560	-0.341281
-1.13	561	-0.813158
-1.47	562	-1.15893
-1.53	563	-1.27103
-1.15	564	-1.06794
-0.51	565	-0.591819
0.41	566	0.065689
1.21	567	0.767533
1.71	568	1.35623
2.05	569	1.7127
2.01	570	1.76236
1.49	571	1.4554
0.81	572	0.905735
0.15	573	0.242881
-0.39	574	-0.423328
-0.93	575	-0.918439
-1.18	576	-1.14039
-1.11	577	-1.06566
-0.65	578	-0.734493
-0.19	579	-0.269478
0.29	580	0.183879
0.67	581	0.506083
0.76	582	0.583793
0.53	583	0.417735
-0.03	584	0.029842
-0.69	585	-0.487195
-1.19	586	-0.959686
-1.41	587	-1.26941
-1.37	588	-1.30538
-0.81	589	-1.00535
0	590	-0.445375
0.83	591	0.273097
1.57	592	0.988156
2.05	593	1.54763
2.27	594	1.8367
1.91	595	1.7862
1.31	596	1.37194
0.69	597	0.757797
0.01	598	0.0477953
-0.68	599	-0.616154
-1.07	600	-1.06103
-1.25	601	-1.20545
-1.07	602	-1.04446
-0.51	603	-0.643721
0.01	604	-0.143828
0.55	605	0.304484
0.84	606	0.586907
0.85	607	0.600041
0.55	608	0.369865
0.05	609	-0.0779039
-0.65	610	-0.614849
-1.21	611	-1.06805
-1.45	612	-1.3267
-1.19	613	-1.2795
-0.61	614	-0.897835
0.15	615	-0.27976
1.01	616	0.463485
1.71	617	1.15681
2.17	618	1.65806
2.29	619	1.86296
1.95	620	1.70843
1.25	621	1.21731
0.45	622	0.56319
-0.22	623	-0.159674
-0.78	624	-0.781433
-1.11	625	-1.15088
-1.21	626	-1.20769
-1.03	627	-0.965109
-0.31	628	-0.513945
0.24	629	-0.00228998
0.67	630	0.422777
0.91	631	0.650219
0.85	632	0.603226
0.47	633	0.317449
-0.15	634	-0.169769
-0.79	635	-0.699671
-1.27	636	-1.1189
-1.47	637	-1.31882
-1.25	638	-1.19673
-0.59	639	-0.762738
0.25	640	-0.119847
1.11	641	0.607927
1.85	642	1.24867
2.22	643	1.67083
2.19	644	1.78778
1.71	645	1.54541
0.97	646	1.01104
0.27	647	0.346618
-0.33	648	-0.350211
-0.89	649	-0.902363
-1.21	650	-1.18338
-1.19	651	-1.15582
-0.81	652	-0.84737
-0.13	653	-0.368169
0.36	654	0.133509
0.81	655	0.525907
1.01	656	0.694671
0.89	657	0.603827
0.51	658	0.278425
-0.07	659	-0.221304
-0.79	660	-0.723332
-1.21	661	-1.10186
-1.35	662	-1.24704
-0.94	663	-1.0737
-0.35	664	-0.623381
0.57	665	0.00724016
1.23	666	0.684981
1.88	667	1.25007
2.27	668	1.58667
2.22	669	1.62574
1.69	670	1.32441
0.96	671	0.780953
0.27	672	0.135378
-0.48	673	-0.504005
-0.85	674	-0.973392
-1.17	675	-1.16685
-1.03	676	-1.06803
-0.51	677	-0.716748
0	678	-0.229313
0.65	679	0.250323
1.11	680	0.607832
1.31	681	0.730069
1.17	682	0.61577
0.69	683	0.27227
-0.04	684	-0.213026
-0.65	685	-0.678739
-1.05	686	-1.01927
-1.16	687	-1.12604
-0.97	688	-0.935667
-0.45	689	-0.505061
0.37	690	0.0798735
1.21	691	0.683756
1.69	692	1.16358
1.98	693	1.42242
1.88	694	1.40411
1.49	695	1.0791
0.84	696	0.553282
0.13	697	-0.0467701
-0.56	698	-0.614045
-1.17	699	-1.00011
-1.27	700	-1.12009
-1.29	701	-0.969438
-0.99	702	-0.596314
-0.23	703	-0.113987
0.35	704	0.344137
0.77	705	0.67112
0.93	706	0.772459
0.85	707	0.653716
0.45	708	0.315647
-0.13	709	-0.13922
-0.69	710	-0.571794
-1.03	711	-0.887005
-1.13	712	-0.981856
-0.83	713	-0.810678
-0.33	714	-0.42934
0.42	715	0.086724
1.01	716	0.607621
1.47	717	1.0084
1.73	718	1.20791
1.61	719	1.15785
1.03	720	0.840551
0.45	721	0.352306
-0.18	722	-0.189153
-0.83	723	-0.683932
-1.19	724	-0.999587
-1.33	725	-1.06598
-1.17	726	-0.882954
-0.7	727	-0.50195
-0.05	728	-0.0274765
0.53	729	0.417943
0.95	730	0.730607
1.15	731	0.836827
0.96	732	0.730436
0.57	733	0.413689
0.15	734	-0.00927908
-0.45	735	-0.421838
-0.83	736	-0.732741
-0.92	737	-0.845235
-0.77	738	-0.722409
-0.26	739	-0.408009
0.22	740	0.0301278
0.82	741	0.475524
1.26	742	0.815849
1.47	743	0.978733
1.35	744	0.921019
0.88	745	0.634063
0.39	746	0.191219
-0.18	747	-0.293599
-0.76	748	-0.726777
-1.05	749	-0.992674
-1.16	750	-1.02445
		-0.82297
		-0.438247
		0.0360943
		0.48423
		0.803797
		0.93234
		0.84952
		0.5574
		0.15325
		-0.258044
		-0.589213
		-0.744161
		-0.685252
		-0.441304
		-0.0726711
		0.316521
		0.621595
		0.769856
		0.72249
		0.471323
		0.0709283
		-0.370159
		-0.761231
		-0.997032
		-1.00789
		-0.792362
		-0.396863
		0.0914604
		0.559357
		0.903413
		1.06146
		1.00202
		0.722608
		0.316968
		-0.114738
		-0.486706
		-0.696352
		-0.700872
		-0.516016
		-0.195036
		0.163633
		0.458473
		0.608371
		0.577029
		0.353437
		-0.018475
		-0.435532
		-0.804215
		-1.02316
		-1.01711
		-0.780973
		-0.361081
		0.157641
		0.658237
		1.03326
		1.21643
		1.16652
		0.876801
		0.447995
