# Supplementary material for: Numerical study of hydrodynamic and salinity transport processes in the Pink Beach wetlands of the Liao River estuary, China
Source: Copernicus journal article supplement (doi:10.5194/os-14-437-2018), 2018-06-11
Supplement: Supplementary file 21 [file H2.xls]

## Sheet: Sheet1
0	0.69	0.745021
1	0.02	0.182855
2	-0.53	-0.416444
3	-1	-0.88325
4	-1.26	-1.11836
5	-1.29	-1.07547
6	-1	-0.770814
7	-0.49	-0.326274
8	0.02	0.122732
9	0.39	0.465293
10	0.53	0.615592
11	0.5	0.551378
12	0.21	0.264744
13	-0.24	-0.157451
14	-0.85	-0.554412
15	-1.19	-0.874247
16	-1.32	-1.01945
17	-1.09	-0.886886
18	-0.52	-0.513257
19	0.19	0.00910619
20	0.85	0.569582
21	1.33	1.02938
22	1.65	1.3105
23	1.6	1.34939
24	1.25	1.06718
25	0.68	0.604838
26	-0.05	0.0853146
27	-0.58	-0.454114
28	-1.07	-0.87123
29	-1.48	-1.07322
30	-1.5	-1.01491
31	-1.23	-0.714886
32	-0.68	-0.28383
33	-0.14	0.15864
34	0.3	0.501275
35	0.55	0.668248
36	0.6	0.6338
37	0.32	0.377806
38	-0.18	-0.0135121
39	-0.69	-0.396533
40	-1.07	-0.719451
41	-1.18	-0.892692
42	-1	-0.819481
43	-0.59	-0.520373
44	0.24	-0.0708093
45	0.87	0.427596
46	1.26	0.845476
47	1.54	1.10829
48	1.5	1.15242
49	1.17	0.918615
50	0.62	0.496206
51	0.06	0.0118381
52	-0.55	-0.481152
53	-0.91	-0.872725
54	-1.1	-1.06039
55	-1.05	-0.99446
56	-0.81	-0.693771
57	-0.37	-0.25485
58	0.29	0.206532
59	0.65	0.577954
60	0.88	0.782502
61	1.02	0.785486
62	0.83	0.55704
63	0.37	0.172323
64	-0.11	-0.226158
65	-0.53	-0.582252
66	-0.81	-0.813902
67	-0.79	-0.817818
68	-0.55	-0.593716
69	-0.2	-0.203105
70	0.33	0.25928
71	0.85	0.663822
72	1.24	0.926991
73	1.32	0.993135
74	1.07	0.805588
75	0.64	0.411746
76	0.1	-0.0554507
77	-0.49	-0.524419
78	-0.9	-0.908278
79	-1.14	-1.08996
80	-1.15	-1.00996
81	-0.88	-0.688756
82	-0.33	-0.216276
83	0.28	0.289676
84	0.82	0.708827
85	1.07	0.957415
86	1.16	0.991825
87	0.95	0.768364
88	0.53	0.35951
89	-0.04	-0.079964
90	-0.45	-0.495288
91	-0.84	-0.798016
92	-0.94	-0.875636
93	-0.82	-0.709485
94	-0.41	-0.350678
95	-0.06	0.101919
96	0.55	0.516272
97	0.93	0.793408
98	1.07	0.877513
99	0.92	0.720629
100	0.54	0.332612
101	-0.05	-0.13784
102	-0.6	-0.600701
103	-1	-0.984504
104	-1.21	-1.15578
105	-1.22	-1.04195
106	-0.9	-0.673602
107	-0.41	-0.1436
108	0.29	0.422658
109	0.86	0.893565
110	1.21	1.17691
111	1.35	1.22285
112	1.14	0.966876
113	0.62	0.507154
114	0.12	0.0128894
115	-0.38	-0.476211
116	-0.8	-0.843866
117	-0.96	-0.971968
118	-0.9	-0.834631
119	-0.57	-0.475726
120	-0.02	-0.0111818
121	0.49	0.423848
122	0.83	0.714555
123	0.96	0.800531
124	0.79	0.643066
125	0.33	0.240028
126	-0.25	-0.250193
127	-0.74	-0.715802
128	-1.2	-1.09462
129	-1.4	-1.2369
130	-1.28	-1.06148
131	-0.89	-0.620526
132	-0.25	-0.0199114
133	0.5	0.607398
134	1	1.11606
135	1.47	1.41018
136	1.59	1.43637
137	1.28	1.10522
138	0.73	0.585585
139	0.09	0.0340818
140	-0.47	-0.527666
141	-1.01	-0.934477
142	-1.27	-1.0791
143	-1.26	-0.934314
144	-0.93	-0.546908
145	-0.39	-0.0598454
146	0.18	0.389681
147	0.58	0.68058
148	0.77	0.742733
149	0.59	0.554566
150	0.16	0.118782
151	-0.45	-0.395333
152	-0.93	-0.860464
153	-1.3	-1.21736
154	-1.45	-1.30163
155	-1.3	-1.03858
156	-0.65	-0.50997
157	0.1	0.159474
158	0.84	0.829015
159	1.41	1.34959
160	1.73	1.6225
161	1.7	1.57965
162	1.31	1.15515
163	0.67	0.583082
164	-0.01	-0.0259752
165	-0.45	-0.634262
166	-0.96	-1.04317
167	-1.16	-1.16557
168	-1.07	-0.978529
169	-0.73	-0.546517
170	-0.22	-0.0417428
171	0.34	0.405765
172	0.66	0.670036
173	0.69	0.6844
174	0.54	0.442319
175	0.05	-0.0356038
176	-0.54	-0.561912
177	-1.01	-1.01301
178	-1.37	-1.3234
179	-1.4	-1.31683
180	-1.01	-0.950706
181	-0.3	-0.337529
182	0.41	0.382899
183	0.96	1.06389
184	1.46	1.559
185	1.93	1.77793
186	1.79	1.62034
187	1.19	1.10902
188	0.48	0.50324
189	-0.18	-0.157725
190	-0.7	-0.76905
191	-1.06	-1.14044
192	-1.28	-1.20408
193	-1.17	-0.951131
194	-0.69	-0.476762
195	-0.14	0.0297108
196	0.06	0.450653
197	0.32	0.659684
198	0.64	0.606994
199	0.27	0.300322
200	0.03	-0.213414
201	-0.66	-0.728017
202	-1.15	-1.1471
203	-1.45	-1.38026
204	-1.3	-1.25738
205	-0.73	-0.789724
206	-0.05	-0.115293
207	0.72	0.626265
208	1.42	1.28095
209	1.78	1.71131
210	1.85	1.83841
211	1.45	1.54576
212	0.94	0.977212
213	0.25	0.350952
214	-0.4	-0.334283
215	-0.91	-0.90126
216	-1.23	-1.20044
217	-1.31	-1.17893
218	-1	-0.853154
219	-0.44	-0.355978
220	0.19	0.130742
221	0.59	0.498632
222	0.76	0.630549
223	0.7	0.502628
224	0.25	0.132367
225	-0.38	-0.392712
226	-0.87	-0.870391
227	-1.34	-1.23545
228	-1.47	-1.36104
229	-1.21	-1.11541
230	-0.59	-0.568643
231	0.18	0.132579
232	0.96	0.857844
233	1.55	1.44482
234	1.9	1.77955
235	1.85	1.7824
236	1.62	1.37236
237	0.61	0.784749
238	-0.13	0.144446
239	-0.74	-0.520802
240	-1.06	-1.00406
241	-1.16	-1.20474
242	-1.17	-1.08875
243	-0.99	-0.702079
244	-0.37	-0.212675
245	0.25	0.237266
246	0.47	0.52879
247	0.54	0.574959
248	0.4	0.378089
249	-0.07	-0.0434783
250	-0.63	-0.545171
251	-1.07	-0.966295
252	-1.34	-1.25313
253	-1.35	-1.25479
254	-1.05	-0.905485
255	-0.39	-0.314846
256	0.45	0.380473
257	1.3	1.04471
258	1.7	1.53028
259	1.92	1.75414
260	1.6	1.61503
261	1.04	1.13321
262	0.42	0.553519
263	-0.21	-0.0854753
264	-0.78	-0.682872
265	-1.16	-1.0584
266	-1.26	-1.15145
267	-1.07	-0.946918
268	-0.59	-0.527706
269	0	-0.0671112
270	0.36	0.323887
271	0.54	0.525824
272	0.56	0.497111
273	0.28	0.242765
274	-0.24	-0.198681
275	-0.8	-0.646071
276	-1.12	-1.00085
277	-1.42	-1.18954
278	-1.26	-1.07282
279	-0.77	-0.657211
280	-0.02	-0.063513
281	0.84	0.592838
282	1.34	1.16074
283	1.72	1.52896
284	1.79	1.63518
285	1.4	1.36715
286	0.77	0.865499
287	0.08	0.30566
288	-0.42	-0.301581
289	-0.92	-0.795983
290	-1.2	-1.06037
291	-1.13	-1.05103
292	-0.87	-0.778808
293	-0.4	-0.360441
294	0.12	0.0609277
295	0.51	0.376624
296	0.62	0.498393
297	0.54	0.410602
298	0.12	0.115138
299	-0.41	-0.304572
300	-0.96	-0.683978
301	-1.2	-0.967318
302	-1.22	-1.05285
303	-0.9	-0.848381
304	-0.24	-0.408916
305	0.36	0.158188
306	1.02	0.736411
307	1.54	1.19171
308	1.82	1.44531
309	1.64	1.42923
310	1.24	1.08629
311	0.61	0.600511
312	-0.01	0.065205
313	-0.52	-0.474198
314	-0.89	-0.85866
315	-1.08	-1.019
316	-0.94	-0.924633
317	-0.66	-0.613897
318	-0.31	-0.217458
319	0.34	0.156701
320	0.57	0.399684
321	0.7	0.46376
322	0.48	0.335173
323	0.04	0.0248576
324	-0.5	-0.344804
325	-0.92	-0.660032
326	-1.12	-0.871056
327	-1.02	-0.8711
328	-0.62	-0.623581
329	-0.04	-0.196745
330	0.64	0.317778
331	1.12	0.798656
332	1.5	1.14723
333	1.6	1.29694
334	1.3	1.17976
335	0.68	0.816067
336	0.14	0.356968
337	-0.41	-0.139257
338	-0.92	-0.591326
339	-1.22	-0.879028
340	-1.26	-0.951509
341	-1.08	-0.796546
342	-0.74	-0.474227
343	-0.18	-0.102045
344	0.2	0.22101
345	0.42	0.412565
346	0.42	0.4426
347	0.21	0.290657
348	-0.22	-0.00405678
349	-0.68	-0.320737
350	-1	-0.584127
351	-1.12	-0.734826
352	-0.94	-0.687244
353	-0.5	-0.436705
354	0.08	-0.0473214
355	0.77	0.395162
356	1.17	0.783042
357	1.49	1.04121
358	1.47	1.10747
359	1.04	0.933658
360	0.54	0.578915
361	-0.01	0.151214
362	-0.43	-0.292579
363	-0.83	-0.6633
364	-1.02	-0.874468
365	-1.02	-0.880965
366	-0.74	-0.689028
367	-0.26	-0.367326
368	0.22	-0.0149215
369	0.54	0.273184
370	0.68	0.440375
371	0.64	0.454472
372	0.28	0.29918
373	-0.16	0.0329368
374	-0.54	-0.246616
375	-0.82	-0.476624
376	-0.86	-0.596375
377	-0.68	-0.542197
378	-0.28	-0.317683
379	0.2	0.0207949
380	0.78	0.393468
381	1.2	0.707167
382	1.4	0.898318
383	1.26	0.912588
384	0.84	0.721646
385	0.4	0.38781
386	-0.14	-0.00651819
387	-0.62	-0.400169
388	-0.97	-0.7105
389	-1.14	-0.865672
390	-1.1	-0.827869
391	-0.82	-0.611252
392	-0.4	-0.286217
393	0.06	0.0595564
394	0.36	0.339066
395	0.48	0.504665
396	0.44	0.518638
397	0.12	0.371777
398	-0.22	0.121431
399	-0.62	-0.144982
400	-0.86	-0.369221
401	-0.92	-0.494602
402	-0.8	-0.464279
403	-0.42	-0.280395
404	-0.02	0.00814105
405	0.47	0.329541
406	0.8	0.596527
407	0.98	0.751215
408	0.92	0.745623
409	0.49	0.559553
410	0.09	0.245298
411	-0.43	-0.122138
412	-0.86	-0.480758
413	-1.13	-0.754664
414	-1.23	-0.872989
415	-1.04	-0.802367
416	-0.7	-0.560341
417	-0.36	-0.215046
418	0.06	0.146475
419	0.38	0.442287
420	0.57	0.622196
421	0.52	0.643559
422	0.32	0.497662
423	-0.06	0.238319
424	-0.46	-0.0452223
425	-0.68	-0.295822
426	-0.71	-0.456261
427	-0.53	-0.466029
428	-0.32	-0.323262
429	0.07	-0.0671714
430	0.5	0.231266
431	0.86	0.482549
432	0.98	0.630061
433	0.83	0.624992
434	0.57	0.448165
435	0.11	0.143389
436	-0.44	-0.213879
437	-0.8	-0.558421
438	-1.09	-0.814735
439	-1.15	-0.907992
440	-1.02	-0.802525
441	-0.64	-0.520654
442	-0.16	-0.13211
443	0.34	0.269351
444	0.76	0.599047
445	1.04	0.797433
446	1.02	0.821265
447	0.74	0.651539
448	0.3	0.352368
449	-0.06	0.0230557
450	-0.42	-0.282366
451	-0.58	-0.494413
452	-0.59	-0.544541
453	-0.44	-0.42681
454	-0.06	-0.176053
455	0.3	0.131597
456	0.54	0.393896
457	0.78	0.551921
458	0.69	0.554251
459	0.42	0.37646
460	0.15	0.0620821
461	-0.28	-0.304703
462	-0.72	-0.653595
463	-0.98	-0.904057
464	-1.08	-0.969784
465	-0.96	-0.814599
466	-0.48	-0.470866
467	0.08	-0.0159253
468	0.71	0.442558
469	1.08	0.810292
470	1.24	1.02295
471	1.14	1.02971
472	0.74	0.799679
473	0.26	0.43346
474	-0.26	0.0373434
475	-0.65	-0.340888
476	-0.86	-0.604335
477	-0.87	-0.680721
478	-0.68	-0.56055
479	-0.32	-0.282629
480	0.09	0.0584454
481	0.4	0.350547
482	0.72	0.520497
483	0.69	0.523728
484	0.35	0.327183
485	-0.01	-0.021051
486	-0.48	-0.413915
487	-0.88	-0.776398
488	-1.14	-1.02171
489	-1.16	-1.0459
490	-0.94	-0.818693
491	-0.56	-0.389827
492	0.23	0.14692
493	0.84	0.667114
494	1.24	1.06653
495	1.38	1.2734
496	1.28	1.2328
497	0.96	0.906559
498	0.4	0.461378
499	-0.13	-0.0141066
500	-0.55	-0.469483
501	-0.88	-0.766423
502	-0.98	-0.843367
503	-0.84	-0.689216
504	-0.44	-0.35454
505	-0.03	0.0336389
506	0.33	0.358823
507	0.51	0.532009
508	0.57	0.514859
509	0.36	0.27872
510	-0.1	-0.123405
511	-0.68	-0.550593
512	-1.12	-0.925537
513	-1.28	-1.15537
514	-1.2	-1.11486
515	-0.82	-0.791807
516	0.02	-0.263111
517	0.6	0.357265
518	1.02	0.930779
519	1.48	1.34347
520	1.58	1.52152
521	1.26	1.3831
522	0.86	0.949192
523	0.23	0.428092
524	-0.42	-0.136644
525	-0.94	-0.647275
526	-1.2	-0.951559
527	-1.28	-0.997428
528	-1.13	-0.775791
529	-0.77	-0.370981
530	-0.17	0.0637079
531	0.22	0.411297
532	0.44	0.570468
533	0.38	0.507991
534	0.15	0.211519
535	-0.4	-0.25214
536	-0.96	-0.710228
537	-1.31	-1.09038
538	-1.48	-1.28282
539	-1.26	-1.15262
540	-0.62	-0.718161
541	0.02	-0.0902648
542	0.76	0.602967
543	1.36	1.20802
544	1.68	1.60601
545	1.74	1.72683
546	1.38	1.45061
547	0.71	0.920785
548	0.1	0.329838
549	-0.47	-0.315996
550	-0.98	-0.846018
551	-1.28	-1.12743
552	-1.28	-1.10795
553	-0.97	-0.797846
554	-0.58	-0.3247
555	-0.03	0.143645
556	0.33	0.492932
557	0.48	0.615236
558	0.35	0.487468
559	-0.06	0.116147
560	-0.68	-0.402107
561	-1.24	-0.878398
562	-1.58	-1.24931
563	-1.64	-1.3786
564	-1.26	-1.13927
565	-0.62	-0.593178
566	0.3	0.117364
567	1.1	0.857215
568	1.6	1.46439
569	1.94	1.8194
570	1.9	1.83554
571	1.38	1.42709
572	0.7	0.828586
573	0.04	0.168641
574	-0.5	-0.523694
575	-1.04	-1.03638
576	-1.29	-1.26055
577	-1.22	-1.15068
578	-0.76	-0.748078
579	-0.3	-0.225196
580	0.18	0.25866
581	0.56	0.585274
582	0.65	0.649339
583	0.42	0.44608
584	-0.14	-0.00374511
585	-0.8	-0.556158
586	-1.3	-1.03248
587	-1.52	-1.37582
588	-1.48	-1.41914
589	-0.92	-1.06658
590	-0.11	-0.4287
591	0.72	0.338322
592	1.46	1.08919
593	1.94	1.66395
594	2.16	1.95246
595	1.8	1.83539
596	1.2	1.31875
597	0.58	0.679919
598	-0.1	-0.0347072
599	-0.79	-0.729386
600	-1.18	-1.18817
601	-1.36	-1.3282
602	-1.18	-1.11756
603	-0.62	-0.636084
604	-0.1	-0.0893159
605	0.44	0.38794
606	0.73	0.667451
607	0.74	0.663641
608	0.44	0.385964
609	-0.06	-0.129238
610	-0.76	-0.688669
611	-1.32	-1.15017
612	-1.56	-1.4466
613	-1.3	-1.38905
614	-0.72	-0.94318
615	0.04	-0.246972
616	0.9	0.53959
617	1.6	1.26656
618	2.06	1.77886
619	2.18	1.97375
620	1.84	1.72853
621	1.14	1.14795
622	0.34	0.486699
623	-0.33	-0.250434
624	-0.89	-0.902303
625	-1.22	-1.28293
626	-1.32	-1.32352
627	-1.14	-1.01897
628	-0.42	-0.486632
629	0.13	0.0620385
630	0.56	0.511407
631	0.8	0.729137
632	0.74	0.658015
633	0.36	0.316879
634	-0.26	-0.23417
635	-0.9	-0.775095
636	-1.38	-1.21046
637	-1.58	-1.44385
638	-1.36	-1.29526
639	-0.7	-0.789941
640	0.14	-0.0759305
641	1	0.693469
642	1.74	1.36231
643	2.11	1.79039
644	2.08	1.88521
645	1.6	1.54029
646	0.86	0.935443
647	0.16	0.272089
648	-0.44	-0.447748
649	-1	-1.02501
650	-1.32	-1.31331
651	-1.3	-1.25687
652	-0.92	-0.878293
653	-0.24	-0.326658
654	0.25	0.206514
655	0.7	0.614443
656	0.9	0.77075
657	0.78	0.647109
658	0.4	0.258208
659	-0.18	-0.293428
660	-0.9	-0.798824
661	-1.32	-1.19987
662	-1.46	-1.36714
663	-1.05	-1.15676
664	-0.46	-0.634204
665	0.46	0.0560217
666	1.12	0.775236
667	1.77	1.36111
668	2.16	1.69753
669	2.11	1.70577
670	1.58	1.30136
671	0.85	0.704697
672	0.16	0.0620215
673	-0.59	-0.605504
674	-0.96	-1.09267
675	-1.28	-1.28719
676	-1.14	-1.14992
677	-0.62	-0.725722
678	-0.11	-0.181757
679	0.54	0.329798
680	1	0.691608
681	1.2	0.801899
682	1.06	0.649501
683	0.58	0.236564
684	-0.15	-0.288187
685	-0.76	-0.752858
686	-1.16	-1.11818
687	-1.27	-1.23428
688	-1.08	-1.0026
689	-0.56	-0.506234
690	0.26	0.131674
691	1.1	0.773294
692	1.58	1.26611
693	1.87	1.5206
694	1.77	1.46713
695	1.38	1.0464
696	0.73	0.482365
697	0.02	-0.119199
698	-0.67	-0.712633
699	-1.28	-1.11187
700	-1.38	-1.2258
701	-1.4	-1.03184
702	-1.1	-0.589378
703	-0.34	-0.0621389
704	0.24	0.425006
705	0.66	0.749706
706	0.82	0.839102
707	0.74	0.680257
708	0.34	0.271239
709	-0.24	-0.213217
710	-0.8	-0.643508
711	-1.14	-0.98084
712	-1.24	-1.07621
713	-0.94	-0.866172
714	-0.44	-0.426774
715	0.31	0.137771
716	0.9	0.690902
717	1.36	1.09921
718	1.62	1.29225
719	1.5	1.20725
720	0.92	0.807499
721	0.34	0.287445
722	-0.29	-0.258838
723	-0.94	-0.773994
724	-1.3	-1.10143
725	-1.44	-1.15597
726	-1.28	-0.929666
727	-0.81	-0.486475
728	-0.16	0.0276665
729	0.42	0.49555
730	0.84	0.805415
731	1.04	0.897982
732	0.85	0.752172
733	0.46	0.367441
734	0.04	-0.080345
735	-0.56	-0.490735
736	-0.94	-0.818652
737	-1.03	-0.928862
738	-0.88	-0.772753
739	-0.37	-0.408441
740	0.11	0.0757627
741	0.71	0.549594
742	1.15	0.894978
743	1.36	1.05167
744	1.24	0.963621
745	0.77	0.606592
746	0.28	0.132926
747	-0.29	-0.358147
748	-0.87	-0.80744
749	-1.16	-1.08451
750	-1.27	-1.1018
		-0.859386
		-0.419387
		0.0923424
		0.557601
		0.876039
		0.991623
		0.871049
		0.513376
		0.0857365
		-0.324375
		-0.668654
		-0.82212
		-0.736741
		-0.450316
		-0.0372484
		0.380433
		0.689715
		0.834731
		0.762451
		0.451771
		0.0209952
		-0.428249
		-0.833187
		-1.08051
		-1.07798
		-0.823527
		-0.377717
		0.147636
		0.631051
		0.975852
		1.12202
		1.02757
		0.681889
		0.252723
		-0.179612
		-0.563704
		-0.772843
		-0.758827
		-0.536653
		-0.171004
