# Supplementary material for: Numerical study of hydrodynamic and salinity transport processes in the Pink Beach wetlands of the Liao River estuary, China
Source: Copernicus journal article supplement (doi:10.5194/os-14-437-2018), 2018-06-11
Supplement: Supplementary file 23 [file Salinity and depth of G1.xls]

## Sheet: Salinity
G1	0	Measured	0.01	Modeled	0
	2		0.01		0
	4		0.01		0
	6		0.01		0
	8		0.01		0
	10		0		0
	12		0		0
	14		0		0
	16		0		0
	18		0		0
	20		0		0
	22		0		0
	24		0		0
	26		0		0
	28		0		0
	30		0		0
	32		0		0
	34		0		0
	36		0		0
	38		0		0
	40		0		0
	42		0		0
	44		0		0
	46		0		0
	48		0		0
	50		0		0
	52		0		0
	54		0		0
	56		0		0
	58		0		0
	60		0		0
	62		0		0
	64		0		0
	66		0		0
	68		0		0
	70		0		0
	72		0		0
	74		0		0
	76		0		0
	78		0		0
	80		0		0
	82		0		0
	84		0		0
	86		0		0
	88		0		0
	90		0		0
	92		0		0
	94		0		0
	96		0		0
	98		0		0
	100		0		0
	102		0		0
	104		0		0
	106		0		0
	108		0		0
	110		0		0
	112		0		0
	114		0		0
	116		0		0
	118		0		0
	120		0		0
	122		0		0
	124		0		0
	126		0		0
	128		0		0
	130		0		0
	132		0		0
	134		30.56		27.7336
	136		30.63		27.7335
	138		31.02		27.7335
	140		30.76		27.7335
	142		30.4		27.7335
	144		30.16		27.7335
	146		29.99		27.7335
	148		29.87		27.7335
	150		29.8		27.7335
	152		29.75		27.7335
	154		29.7		27.7335
	156		29.67		27.7335
	158		29.63		27.7335
	160		29.59		27.7335
	162		29.55		27.7335
	164		29.51		27.7335
	166		29.47		27.7335
	168		29.44		27.7335
	170		29.39		27.7335
	172		29.36		27.7335
	174		29.32		27.7335
	176		29.28		27.7335
	178		29.26		27.7335
	180		29.17		27.7335
	182		29.1		27.7335
	184		29.06		27.7335
	186		28.92		27.7335
	188		28.83		27.7335
	190		28.72		27.7335
	192		28.64		27.7335
	194		28.57		27.7335
	196		28.52		27.7335
	198		28.46		27.7335
	200		28.42		27.7335
	202		28.39		27.7335
	204		28.34		27.7335
	206		28.32		27.7335
	208		28.29		27.7335
	210		28.26		27.7335
	212		28.23		27.7335
	214		28.2		27.7335
	216		28.2		27.7335
	218		28.19		27.7335
	220		28.18		27.7335
	222		28.18		27.7335
	224		28.19		27.7335
	226		28.19		27.7335
	228		28.18		27.7335
	230		28.19		27.7335
	232		28.18		27.7335
	234		28.18		27.7335
	236		28.17		27.7335
	238		28.17		27.7335
	240		28.17		27.7335
	242		28.16		27.7335
	244		28.16		27.7335
	246		28.16		27.7335
	248		28.15		27.7335
	250		28.14		27.7335
	252		28.13		27.7335
	254		28.15		27.7335
	256		28.15		27.7335
	258		28.15		27.7335
	260		28.15		27.7335
	262		28.15		27.7335
	264		28.15		27.7335
	266		28.15		27.7335
	268		28.15		27.7335
	270		28.15		27.7335
	272		28.16		27.7335
	274		28.16		27.7335
	276		28.17		27.7335
	278		28.17		27.7335
	280		28.17		27.7335
	282		28.17		27.7335
	284		28.19		27.7335
	286		28.2		27.7335
	288		28.2		27.7335
	290		28.2		27.7335
	292		28.2		27.7335
	294		28.2		27.7335
	296		28.2		27.7335
	298		28.22		27.7335
	300		28.23		27.7335
	302		28.24		27.7335
	304		28.26		27.7335
	306		28.26		27.7335
	308		28.25		27.7335
	310		28.25		27.7335
	312		28.25		27.7335
	314		28.27		27.7335
	316		28.27		27.7335
	318		28.28		27.7335
	320		28.29		27.7335
	322		28.28		27.7335
	324		28.3		27.7335
	326		28.3		27.7335
	328		28.3		27.7335
	330		28.3		27.7335
	332		28.32		27.7335
	334		28.31		27.7335
	336		28.32		27.7335
	338		28.33		27.7335
	340		28.34		27.7335
	342		28.33		27.7335
	344		28.33		27.7335
	346		28.36		27.7335
	348		28.34		27.7335
	350		28.33		27.7335
	352		28.34		27.7335
	354		28.37		27.7335
	356		28.36		27.7335
	358		28.34		27.7335
	360		28.36		27.7335
	362		28.36		27.7335
	364		28.35		27.7335
	366		28.38		27.7335
	368		28.34		27.7335
	370		28.36		27.7335
	372		28.38		27.7335
	374		28.38		27.7335
	376		28.4		27.7335
	378		28.35		27.7335
	380		28.35		27.7335
	382		28.39		27.7335
	384		28.38		27.7335
	386		28.38		27.7335
	388		28.37		27.7335
	390		28.34		27.7335
	392		28.35		27.7335
	394		28.34		27.7335
	396		28.33		27.7335
	398		28.31		27.7335
	400		28.35		27.7335
	402		28.31		27.7335
	404		28.32		27.7335
	406		28.31		27.7335
	408		28.32		27.7335
	410		28.31		27.7335
	412		28.31		27.7335
	414		28.31		27.7335
	416		28.3		27.7335
	418		28.3		27.7335
	420		28.3		27.7335
	422		28.3		27.7335
	424		28.29		27.7335
	426		28.29		27.7335
	428		28.31		27.7335
	430		28.19		27.7335
	432		28.15		27.7335
	434		28.14		27.7335
	436		28.79		27.7335
	438		0		27.7335
	440		0		0
	442		0		0
	444		0		0
	446		0		0
	448		0		0
	450		0		0
	452		0		0
	454		0		0
	456		0		0
	458		0		0
	460		0		0
	462		0		0
	464		0		0
	466		0		0
	468		0		0
	470		0		0
	472		0		0
	474		0		0
	476		0		0
	478		0		0
	480		0		0
	482		0		0
	484		0		0
	486		0		0
	488		0		0
	490		0		0
	492		0		0
	494		0		0
	496		0		0
	498		0		0
	500		0		0
	502		0		0
	504		0		0
	506		0		0
	508		0		0
	510		0		0
	512		0		0
	514		0		0
	516		0		0
	518		0		0
	520		0		0
	522		0		0
	524		0		0
	526		0		0
	528		0		0
	530		0		0
	532		0		0
	534		0		0
	536		0		0
	538		0		0
	540		0		0
	542		0		0
	544		0		0
	546		0		0
	548		0		0
	550		0		0
	552		0		0
	554		0		0
	556		0		0
	558		0		0
	560		0		0
	562		0		0
	564		0		0
	566		0		0
	568		0		0
	570		0		0
	572		0		0
	574		0		0
	576		0		0
	578		0		0
	580		0		0
	582		0		0
	584		0		0
	586		0		0
	588		0		0
	590		0		0
	592		0		0
	594		0		0
	596		0		0
	598		0		0
	600		0		0
	602		0		0
	604		0		0
	606		0		0
	608		0		0
	610		0		0
	612		0		0
	614		0		0
	616		0		0
	618		0		0
	620		0		0
	622		0		0
	624		0		0
	626		0		0
	628		0		0
	630		0		0
	632		0		0
	634		0		0
	636		0		0
	638		0		0
	640		0		0
	642		0		0
	644		0		0
	646		0		0
	648		0		0
	650		0		0
	652		0		0
	654		0		0
	656		0		0
	658		0		0
	660		0		0
	662		0		0
	664		0		0
	666		0		0
	668		0		0
	670		0		0
	672		0		0
	674		0		0
	676		0		0
	678		0		0
	680		0		0
	682		0		0
	684		0		0
	686		0		0
	688		0		0
	690		0		0
	692		0		0
	694		0		0
	696		0		0
	698		0		0
	700		0		0
	702		0		0
	704		0		0
	706		0		0
	708		0		0
	710		0		0
	712		0		0
	714		0		0
	716		0		0
	718		0		0
	720		0		0
	722		0		0
	724		0		0
	726		0		0
	728		0		0
	730		0		0
	732		0		0
	734		0		0
	736		0		0
	738		0		0
	740		0		0
	742		0		0
	744		0		0
	746		0		0
	748		0		0
	750		0		0
	752		0		0
	754		0		0
	756		0		0
	758		0		0
	760		0		0
	762		0		0
	764		0		0
	766		0		0
	768		0		0
	770		0		0
	772		0		0
	774		0		0
	776		0		0
	778		0		0
	780		0		0
	782		0		0
	784		0		0
	786		0		0
	788		0		0
	790		0		0
	792		0		0
	794		0		0
	796		0		0
	798		0		0
	800		0		0
	802		0		0
	804		0		0
	806		0		0
	808		0		0
	810		0		0
	812		0		0
	814		0		0
	816		0		0
	818		0		0
	820		0		0
	822		0		0
	824		0		0
	826		0		0
	828		0		0
	830		0		0
	832		0		0
	834		0		0
	836		0		0
	838		0		0
	840		0		0
	842		0		0
	844		0		0
	846		0		0
	848		0		0
	850		0		0
	852		0		0
	854		0		0
	856		0		0
	858		0		0
	860		0		0
	862		0		0
	864		0		0
	866		0		0
	868		0		0
	870		0		0
	872		0		0
	874		0		0
	876		0		0
	878		0		0
	880		0		0
	882		0		0
	884		0		0
	886		0		0
	888		0		0
	890		0		0
	892		0		0
	894		0		0
	896		0		0
	898		0		0
	900		0		0
	902		0		0
	904		0		0
	906		0		0
	908		0		0
	910		0		0
	912		0		0
	914		0		0
	916		0		0
	918		0		0
	920		0		0
	922		0		0
	924		0		0
	926		0		0
	928		0		0
	930		0		0
	932		0		0
	934		0		0
	936		0		0
	938		0		0
	940		0		0
	942		0		0
	944		0		0
	946		0		0
	948		0		0
	950		0		0
	952		0		0
	954		0		0
	956		0		0
	958		0		0
	960		0		0
	962		0		0
	964		0		0
	966		0		0
	968		0		0
	970		0		0
	972		0		0
	974		0		0
	976		0		0
	978		0		0
	980		0		0
	982		0		0
	984		0		0
	986		0		0
	988		0		0
	990		0		0
	992		0		0
	994		0		0
	996		0		0
	998		0		0
	1000		0		0
	1002		0		0
	1004		0		0
	1006		0		0
	1008		0		0
	1010		0		0
	1012		0		0
	1014				0
	1016				0
	1018				0
	1020				0
	1022				0
	1024				0
	1026				0
	1028				0
	1030				0
	1032				0
	1034				0
	1036				0
	1038				0
	1040				0
	1042				0
	1044				0
	1046				0
	1048				0
	1050				0
	1052				0
	1054				0
	1056				0
	1058				0
	1060				0
	1062				0
	1064				0
	1066				0
	1068				0
	1070				0
	1072				0
	1074				0
	1076				0
	1078				0
	1080				0
	1082				0
	1084				0
	1086				0
	1088				0
	1090				0
	1092				0
	1094				0
	1096				0
	1098				0
	1100				0
	1102				0
	1104				0
	1106				0
	1108				0
	1110				0
	1112				0
	1114				0
	1116				0
	1118				0
	1120				0
	1122				0
	1124				0
	1126				0
	1128				0
	1130				0
	1132				0
	1134				0
	1136				0
	1138				0
	1140				0
	1142				0
	1144				0
	1146				0
	1148				0
	1150				0
	1152				0
	1154				0
	1156				0
	1158				0
	1160				0
	1162				0
	1164				0
	1166				0
	1168				0
	1170				0
	1172				0
	1174				0
	1176				0
	1178				0
	1180				0
	1182				0
	1184				0
	1186				0
	1188				0
	1190				0
	1192				0
	1194				0
	1196				0
	1198				0
	1200				0
					0
					0
					0
					0
					0
					0
					0
					0
					0
					0
					0
					0
					0
					0
					0
					0
					0
					0
					0
					0
					0
					0
					0
					0
					0
					0
					0
					0
					0
					0
					0
					0
					0
					0
					0
					0
					0
					0
					0
					0
					0
					0
					0
					0
					0
					0
					0
					0
					0
					0
					0
					0
					0
					0
					0
					0
					0
					0
					0
					0
					0
					0
					0
					0
					0
					0
					0
					0
					0
					0
					0
					0
					0
					0
					0
					0
					0
					0
					0
					0
					0
					0
					0
					0
					0
					0
					0
					0
					0
					0
					0
					0
					0
					0
					0
					0
					0
					0
					0
					0
					0
					0
					0
					0
					0
					0
					0
					0
					0
					0
					0
					0
					0
					0
					0
					0
					0
					0
					0
					0
					0
					0
					0
					0
					0
					0
					0
					0
					0
					0
					0
					0
					0
					0
					0
					0
					0
					0
					0
					0
					0
					0
					0
					0
					0
					0
					0
					0
					0
					0
					0
					0
					0
					0
					0
					0
					0
					0
					0
					0
					0
					0
					0
					0
					0
					0
					0
					0
					0
					0
					0
					0
					0
					0
					0
					0
					0
					0
					0
					0
					0
					0
					0
					0
					0
					0
					0
					0
					0
					0
					0
					0
					0
					0
					0
					0
					0
					0
					0
					0
					0
					0
					0
					0
					0
					0
					0
					0
					0
					0
					0
					0
					0
					0
					0
					0
					0
					0
					0
					0
					0
					0
					0
					0
					0
					0
					0
					0
					0
					0
					0
					0
					0
					0
					0
					0
					0
					0
					0
					0
					0
					0
					0
					0
					0
					0
					0
					0
					0
					0
					0
					0
					0
					0
					0
					0
					0
					0
					0
					0
					0
					0
					0
					0
					0
					0
					0
					0
					0
					0
					0
					0
					0
					0
					0
					0
					0
					0
					0
					0
					0
					0
					0
					0
					0
					0
					0
					0
					0
					0
					0
					0
					0
					0
					0
					0
					0
					0

## Sheet:  Depth
Measured	-0.092	0.008		-30	0.0229487	-12	0
	-0.083	0.017		-28	0.0229487	-10	2
	-0.07	0.03		-26	0.0229487	-8	4
	-0.059	0.041		-24	0.0229487	-6	6
	-0.046	0.054		-22	0.0229487	-4	8
	-0.031	0.069		-20	0.0229487	-2	10
	-0.017	0.083		-18	0.0229487	0	12
	-0.003	0.097		-16	0.0229487	2	14
	0.014	0.114		-14	0.0229487	4	16
	0.03	0.13		-12	0.0229487	6	18
	0.048	0.148		-10	0.0229487	8	20
	0.067	0.167		-8	0.0229487	10	22
	0.088	0.188		-6	0.0229487	12	24
	0.114	0.214		-4	0.0229821	14	26
	0.144	0.244		-2	0.0233543	16	28
	0.179	0.279		0	0.0241365	18	30
	0.217	0.317		2	0.0251721	20	32
	0.258	0.358		4	0.0272877	22	34
	0.296	0.396		6	0.0300899	24	36
	0.328	0.428		8	0.0333123	26	38
	0.355	0.455		10	0.0379932	28	40
	0.375	0.475		12	0.0462273	30	42
	0.393	0.493		14	0.0562635	32	44
	0.411	0.511		16	0.0674819	34	46
	0.428	0.528		18	0.0843264	36	48
	0.446	0.546		20	0.106364	38	50
	0.465	0.565		22	0.130278	40	52
	0.486	0.586		24	0.156016	42	54
	0.506	0.606		26	0.185083	44	56
	0.527	0.627		28	0.22104	46	58
	0.547	0.647		30	0.255316	48	60
	0.566	0.666		32	0.286975	50	62
	0.586	0.686		34	0.318205	52	64
	0.604	0.704		36	0.349064	54	66
	0.621	0.721		38	0.378979	56	68
	0.638	0.738		40	0.408168	58	70
	0.652	0.752		42	0.43689	60	72
	0.666	0.766		44	0.465198	62	74
	0.679	0.779		46	0.493005	64	76
	0.691	0.791		48	0.520232	66	78
	0.702	0.802		50	0.54677	68	80
	0.711	0.811		52	0.572474	70	82
	0.719	0.819		54	0.59722	72	84
	0.724	0.824		56	0.620895	74	86
	0.729	0.829		58	0.643343	76	88
	0.732	0.832		60	0.664399	78	90
	0.734	0.834		62	0.683994	80	92
	0.733	0.833		64	0.702113	82	94
	0.731	0.831		66	0.718734	84	96
	0.728	0.828		68	0.733833	86	98
	0.724	0.824		70	0.747416	88	100
	0.719	0.819		72	0.759509	90	102
	0.714	0.814		74	0.77015	92	104
	0.708	0.808		76	0.779392	94	106
	0.701	0.801		78	0.787285	96	108
	0.695	0.795		80	0.793849	98	110
	0.689	0.789		82	0.799111	100	112
	0.681	0.781		84	0.803098	102	114
	0.674	0.774		86	0.805833	104	116
	0.667	0.767		88	0.80737	106	118
	0.658	0.758		90	0.807791	108	120
	0.649	0.749		92	0.807126	110	122
	0.641	0.741		94	0.805398	112	124
	0.633	0.733		96	0.802642	114	126
	0.625	0.725		98	0.798882	116	128
	0.616	0.716		100	0.794121	118	130
	0.607	0.707		102	0.788332	120	132
	0.599	0.699		104	0.781477	122	134
	0.589	0.689		106	0.773702	124	136
	0.58	0.68		108	0.765283	126	138
	0.57	0.67		110	0.756235	128	140
	0.561	0.661		112	0.746337	130	142
	0.552	0.652		114	0.735292	132	144
	0.541	0.641		116	0.722988	134	146
	0.532	0.632		118	0.709375	136	148
	0.523	0.623		120	0.694463	138	150
	0.513	0.613		122	0.678343	140	152
	0.503	0.603		124	0.661162	142	154
	0.494	0.594		126	0.643074	144	156
	0.486	0.586		128	0.6243	146	158
	0.476	0.576		130	0.605174	148	160
	0.467	0.567		132	0.586033	150	162
	0.458	0.558		134	0.567135	152	164
	0.45	0.55		136	0.548648	154	166
	0.441	0.541		138	0.530661	156	168
	0.432	0.532		140	0.513224	158	170
	0.424	0.524		142	0.496331	160	172
	0.416	0.516		144	0.479839	162	174
	0.407	0.507		146	0.463606	164	176
	0.399	0.499		148	0.447544	166	178
	0.391	0.491		150	0.43158	168	180
	0.383	0.483		152	0.415688	170	182
	0.376	0.476		154	0.399871	172	184
	0.369	0.469		156	0.384105	174	186
	0.362	0.462		158	0.368369	176	188
	0.354	0.454		160	0.352674	178	190
	0.346	0.446		162	0.337017	180	192
	0.34	0.44		164	0.321416	182	194
	0.333	0.433		166	0.305893	184	196
	0.326	0.426		168	0.290446	186	198
	0.318	0.418		170	0.275062	188	200
	0.31	0.41		172	0.259735	190	202
	0.302	0.402		174	0.244473	192	204
	0.293	0.393		176	0.229882	194	206
	0.284	0.384		178	0.214431	196	208
	0.274	0.374		180	0.199502	198	210
	0.265	0.365		182	0.185259	200	212
	0.255	0.355		184	0.17142	202	214
	0.245	0.345		186	0.157781	204	216
	0.234	0.334		188	0.144692	206	218
	0.224	0.324		190	0.131853	208	220
	0.214	0.314		192	0.119148	210	222
	0.204	0.304		194	0.107593	212	224
	0.193	0.293		196	0.0977813	214	226
	0.183	0.283		198	0.0890604	216	228
	0.172	0.272		200	0.0803373	218	230
	0.162	0.262		202	0.0717346	220	232
	0.15	0.25		204	0.0632288	222	234
	0.139	0.239		206	0.0556798	224	236
	0.128	0.228		208	0.0505613	226	238
	0.116	0.216		210	0.0460717	228	240
	0.105	0.205		212	0.0418706	230	242
	0.094	0.194		214	0.0378747	232	244
	0.082	0.182		216	0.0340507	234	246
	0.07	0.17		218	0.0318285	236	248
	0.059	0.159		220	0.0304983	238	250
	0.047	0.147		222	0.0293037	240	252
	0.037	0.137		224	0.028138	242	254
	0.027	0.127		226	0.0270988	244	256
	0.016	0.116		228	0.0261543	246	258
	0.006	0.106		230	0.0252225	248	260
	-0.005	0.095		232	0.0245666	250	262
	-0.014	0.086		234	0.0241104	252	264
	-0.023	0.077		236	0.0236979	254	266
	-0.033	0.067		238	0.0234552	256	268
	-0.043	0.057		240	0.0232538	258	270
	-0.054	0.046		242	0.0230564	260	272
	-0.063	0.037		244	0.0228976	262	274
	-0.074	0.026		246	0.0228976	264	276
	-0.085	0.015		248	0.0228976	266	278
	-0.096	0.004		250	0.0228976	268	280
				252	0.0228976	270	282
				254	0.0228976	272	284
				256	0.0228976	274	286
				258	0.0228976	276	288
				260	0.0228976	278	290
				262	0.0228976	280	292
				264	0.0228976	282	294
				266	0.0228976	284	296
				268	0.0228976	286	298
				270	0.0228976	288	300
				272	0.0228976	290	302
				274	0.0228976	292	304
				276	0.0228976	294	306
				278	0.0228976	296	308
				280	0.0228976	298	310
				282	0.0228976	300	312
				284	0.0228976	302	314
				286	0.0228976	304	316
				288	0.0228976	306	318
				290	0.0228976	308	320
				292	0.0228976	310	322
				294	0.0228976	312	324
				296	0.0228976	314	326
				298	0.0228976	316	328
				300	0.0228976	318	330
				302	0.0228976	320	332
				304	0.0228976	322	334
				306	0.0228976	324	336
				308	0.0228976	326	338
				310	0.0228976	328	340
				312	0.0228976	330	342
				314	0.0228976	332	344
				316	0.0228976	334	346
				318	0.0228976	336	348
				320	0.0228976	338	350
				322	0.0228976	340	352
				324	0.0228976	342	354
				326	0.0228976	344	356
				328	0.0228976	346	358
				330	0.0228976	348	360
				332	0.0228976	350	362
				334	0.0228976	352	364
				336	0.0228976	354	366
				338	0.0228976	356	368
				340	0.0228976	358	370
				342	0.0228976	360	372
				344	0.0228976	362	374
				346	0.0228976	364	376
				348	0.0228976	366	378
				350	0.0228976	368	380
				352	0.0228976	370	382
				354	0.0228976	372	384
				356	0.0228976	374	386
				358	0.0228976	376	388
				360	0.0228976	378	390
				362	0.0228976	380	392
				364	0.0228976	382	394
				366	0.0228976	384	396
				368	0.0228976	386	398
				370	0.0228976	388	400
				372	0.0228976	390	402
				374	0.0228976	392	404
				376	0.0228976	394	406
				378	0.0228976	396	408
				380	0.0228976	398	410
				382	0.0228976	400	412
				384	0.0228976	402	414
				386	0.0228976	404	416
				388	0.0228976	406	418
				390	0.0228976	408	420
				392	0.0228976	410	422
				394	0.0228976	412	424
				396	0.0228976	414	426
				398	0.0228976	416	428
				400	0.0228976	418	430
				402	0.0228976	420	432
				404	0.0228976	422	434
				406	0.0228976	424	436
				408	0.0228976	426	438
				410	0.0228976	428	440
				412	0.0228976	430	442
				414	0.0228976	432	444
				416	0.0228976	434	446
				418	0.0228976	436	448
				420	0.0228976	438	450
				422	0.0228976	440	452
				424	0.0228976	442	454
				426	0.0228976	444	456
				428	0.0228976	446	458
				430	0.0228976	448	460
				432	0.0228976	450	462
				434	0.0228976	452	464
				436	0.0228976	454	466
				438	0.0228976	456	468
				440	0.0228976	458	470
				442	0.0228976	460	472
				444	0.0228976	462	474
				446	0.0228976	464	476
				448	0.0228976	466	478
				450	0.0228976	468	480
				452	0.0228976	470	482
				454	0.0228976	472	484
				456	0.0228976	474	486
				458	0.0228976	476	488
				460	0.0228976	478	490
				462	0.0228976	480	492
				464	0.0228976	482	494
				466	0.0228976	484	496
				468	0.0228976	486	498
				470	0.0228976	488	500
				472	0.0228976	490
				474	0.0228976	492
				476	0.0228976	494
				478	0.0228976	496
				480	0.0228976	498
				482	0.0228976	500
					0.0228976
					0.0228976
					0.0228976
					0.0228976
					0.0228976
					0.0228976
					0.0228976
					0.0228976
					0.0228976
					0.0228976
					0.0228976
					0.0228976
					0.0228976
					0.0228976
					0.0228976
					0.0228976
					0.0228976
					0.0228976
					0.0228976
					0.0228976
					0.0228976
					0.0228976
					0.0228976
					0.0228976
					0.0228976
					0.0228976
					0.0228976
					0.0228976
					0.0228976
					0.0228976
					0.0228976
					0.0228976
					0.0228976
					0.0228976
					0.0228976
					0.0228976
					0.0228976
					0.0228976
					0.0228976
					0.0228976
					0.0228976
					0.0228976
					0.0228976
					0.0228976
					0.0228976
					0.0228976
					0.0228976
					0.0228976
					0.0228976
					0.0228976
					0.0228976
					0.0228976
					0.0228976
					0.0228976
					0.0228976
					0.0228976
					0.0228976
					0.0228976
					0.0228976
					0.0228976
					0.0228976
					0.0228976
					0.0228976
					0.0228976
					0.0228976
					0.0228976
					0.0228976
					0.0228976
					0.0228976
					0.0228976
					0.0228976
					0.0228976
					0.0228976
					0.0228976
					0.0228976
					0.0228976
					0.0228976
					0.0228976
					0.0228976
					0.0228976
					0.0228976
					0.0228976
					0.0228976
					0.0228976
					0.0228976
					0.0228976
					0.0228976
					0.0228976
					0.0228976
					0.0228976
					0.0228976
					0.0228976
					0.0228976
					0.0228976
					0.0228976
					0.0228976
					0.0228976
					0.0228976
					0.0228976
					0.0228976
					0.0228976
					0.0228976
					0.0228976
					0.0228976
					0.0228976
					0.0228976
					0.0228976
					0.0228976
					0.0228976
					0.0228976
					0.0228976
					0.0228976
					0.0228976
					0.0228976
					0.0228976
					0.0228976
					0.0228976
					0.0228976
					0.0228976
					0.0228976
					0.0228976
					0.0228976
					0.0228976
					0.0228976
					0.0228976
					0.0228976
					0.0228976
					0.0228976
					0.0228976
					0.0228976
					0.0228976
					0.0228976
					0.0228976
					0.0228976
					0.0228976
					0.0228976
					0.0228976
					0.0228976
					0.0228976
					0.0228976
					0.0228976
					0.0228976
					0.0228976
					0.0228976
					0.0228976
					0.0228976
					0.0228976
					0.0228976
					0.0228976
					0.0228976
					0.0228976
					0.0228976
					0.0228976
					0.0228976
					0.0228976
					0.0228976
					0.0228976
					0.0228976
					0.0228976
					0.0228976
					0.0228976
					0.0228976
					0.0228976
					0.0228976
					0.0228976
					0.0228976
					0.0228976
					0.0228976
					0.0228976
					0.0228976
					0.0228976
					0.0228976
					0.0228976
					0.0228976
					0.0228976
					0.0228976
					0.0228976
					0.0228976
					0.0228976
					0.0228976
					0.0228976
					0.0228976
					0.0228976
					0.0228976
					0.0228976
					0.0228976
					0.0228976
					0.0228976
					0.0228976
					0.0228976
					0.0228976
					0.0228976
					0.0228976
					0.0228976
					0.0228976
					0.0228976
					0.0228976
					0.0228976
					0.0228976
					0.0228976
					0.0228976
					0.0228976
					0.0228976
					0.0228976
					0.0228976
					0.0228976
					0.0228976
					0.0228976
					0.0228976
					0.0228976
					0.0228976
					0.0228976
					0.0228976
					0.0228976
					0.0228976
					0.0228976
					0.0228976
					0.0228976
					0.0228976
					0.0228976
					0.0228976
					0.0228976
					0.0228976
					0.0228976
					0.0228976
					0.0228976
					0.0228976
					0.0228976
					0.0228976
					0.0228976
					0.0228976
					0.0228976
					0.0228976
					0.0228976
					0.0228976
					0.0228976
					0.0228976
					0.0228976
					0.0228976
					0.0228976
					0.0228976
					0.0228976
					0.0228976
					0.0228976
					0.0228976
					0.0228976
					0.0228976
					0.0228976
					0.0228976
					0.0228976
					0.0228976
					0.0228976
					0.0228976
					0.0228976
					0.0228976
					0.0228976
					0.0228976
					0.0228976
					0.0228976
					0.0228976
					0.0228976
					0.0228976
					0.0228976
					0.0228976
					0.0228976
					0.0228976
					0.0228976
					0.0228976
					0.0228976
					0.0228976
					0.0228976
					0.0228976
					0.0228976
					0.0228976
					0.0228976
					0.0228976
					0.0228976
					0.0228976
					0.0228976
					0.0228976
					0.0228976
					0.0228976
					0.0228976
					0.0228976
					0.0228976
					0.0228976
					0.0228976
					0.0228976
					0.0228976
					0.0228976
					0.0228976
					0.0228976
					0.0228976
					0.0228976
					0.0228976
					0.0228976
					0.0228976
					0.0228976
					0.0228976
					0.0228976
					0.0228976
					0.0228976
					0.0228976
					0.0228976
					0.0228976
					0.0228976
					0.0228976
					0.0228976
					0.0228976
					0.0228976
					0.0228976
					0.0228976
					0.0228976
					0.0228976
					0.0228976
					0.0228976
					0.0228976
					0.0228976
					0.0228976
					0.0228976
					0.0228976
					0.0228976
					0.0228976
					0.0228976
					0.0228976
					0.0228976
					0.0228976
					0.0228976
					0.0228976
					0.0228976
					0.0228976
					0.0228976
					0.0228976
					0.0228976
					0.0228976
					0.0228976
					0.0228976
					0.0228976
					0.0228976
					0.0228976
					0.0228976
					0.0228976
					0.0228976
					0.0228976
					0.0228976
					0.0228976
					0.0228976
					0.0228976
					0.0228976
					0.0228976
					0.0228976
					0.0228976
					0.0228976
					0.0228976
					0.0228976
					0.0228976
					0.0228976
					0.0228976
					0.0228976
					0.0228976
					0.0228976
					0.0228976
					0.0228976
					0.0228976
					0.0228976
					0.0228976
					0.0228976
					0.0228976
					0.0228976
					0.0228976
					0.0228976
					0.0228976
					0.0228976
					0.0228976
					0.0228976
					0.0228976
					0.0228976
					0.0228976
					0.0228976
					0.0228976
					0.0228976
					0.0228976
					0.0228976
					0.0228976
					0.0228976
					0.0228976
					0.0228976
					0.0228976
					0.0228976
					0.0228976
					0.0228976
					0.0228976
					0.0228976
					0.0228976
					0.0228976
					0.0228976
					0.0228976
					0.0228976
					0.0228976
					0.0228976
					0.0228976
					0.0228976
					0.0228976
					0.0228976
					0.0228976
					0.0228976
					0.0228976
					0.0228976
					0.0228976
					0.0228976
					0.0228976
					0.0228976
					0.0228976
					0.0228976
					0.0228976
					0.0228976
					0.0228976
					0.0228976
					0.0228976
					0.0228976
					0.0228976
					0.0228976
					0.0228976
					0.0228976
					0.0228976
					0.0228976
					0.0228976
					0.0228976
					0.0228976
					0.0228976
					0.0228976
					0.0228976
					0.0228976
					0.0228976
					0.0228976
					0.0228976
					0.0228976
					0.0228976
					0.0228976
					0.0228976
					0.0228976
					0.0228976
					0.0228976
					0.0228976
					0.0228976
					0.0228976
					0.0228976
					0.0228976
					0.0228976
					0.0228976
					0.0228976
					0.0228976
					0.0228976
					0.0228976
					0.0228976
					0.0228976
					0.0228976
					0.0228976
					0.0228976
					0.0228976
					0.0228976
					0.0228976
					0.0228976
					0.0228976
					0.0228976
					0.0228976
					0.0228976
					0.0228976
					0.0228976
					0.0228976
					0.0228976
					0.0228976
					0.0228976
					0.0228976
					0.0228976
					0.0228976
					0.0228976
					0.0228976
					0.0228976
					0.0228976
					0.0228976
					0.0228976
					0.0228976
					0.0228976
					0.0228976
					0.0228976
					0.0228976
					0.0228976
					0.0228976
					0.0228976
					0.0228976
					0.0228976
					0.0228976
					0.0228976
					0.0228976
					0.0228976
					0.0228976
					0.0228976
					0.0228976
					0.0228976
					0.0228903
					0.023096
					0.0236847
					0.024541
					0.0258492
					0.0281821
					0.0309716
					0.0339532
					0.0393288
					0.0475339
					0.0571217
					0.0677383
					0.0835842
					0.104229
					0.126144
					0.149214
					0.175224
					0.20469
					0.237043
					0.266181
					0.29312
					0.320201
					0.346398
					0.371632
					0.396139
					0.420077
					0.443433
					0.466171
					0.488267
					0.509663
					0.5303
					0.550158
					0.569232
					0.587479
					0.60481
					0.621133
					0.636391
					0.65049
					0.663293
					0.674665
					0.6845
					0.69277
					0.699487
					0.704647
					0.708235
					0.710197
					0.710524
					0.709268
					0.706411
					0.701879
					0.695617
					0.687617
					0.678007
					0.667137
					0.655378
					0.642853
					0.629537
					0.615501
					0.600891
					0.585878
					0.570593
					0.555171
					0.539782
					0.524559
					0.50958
					0.494918
					0.480576
					0.466512
					0.452647
					0.438891
					0.425155
					0.411333
					0.397338
					0.383136
					0.368756
					0.354237
					0.33963
					0.324998
					0.310356
					0.295694
					0.281002
					0.266277
					0.251532
					0.237097
					0.222517
					0.207655
					0.193516
					0.179727
					0.166275
					0.153179
					0.140538
					0.128089
					0.115802
					0.10513
					0.0959595
					0.0875111
					0.0790764
					0.0707593
					0.0625241
					0.0553833
					0.0504802
					0.0461484
					0.0420789
					0.038195
					0.0344655
					0.031963
					0.0306164
					0.02944
					0.0282936
					0.0272148
					0.0262802
					0.0253569
					0.0246105
					0.0240952
					0.0236824
					0.0233702
					0.0231686
					0.0229694
					0.0227784
					0.0227439
					0.0227439
					0.0227439
					0.0227439
					0.0227439
					0.0227439
					0.0227439
					0.0227439
					0.0227439
					0.0227439
					0.0227439
					0.0227439
					0.0227439
					0.0227439
					0.0227439
					0.0227439
					0.0227439
					0.0227439
					0.0227439
					0.0227439
					0.0227439
					0.0227439
					0.0227439
					0.0227439
					0.0227439
					0.0227439
					0.0227439
					0.0227439
					0.0227439
					0.0227439
					0.0227439
					0.0227439
					0.0227439
					0.0227439
					0.0227439
					0.0227439
					0.0227439
					0.0227439
					0.0227439
					0.0227439
					0.0227439
					0.0227439
					0.0227439
					0.0227439
					0.0227439
					0.0227439
					0.0227439
					0.0227439
					0.0227439
					0.0227439
					0.0227439
					0.0227439
					0.0227439
					0.0227439
					0.0227439
					0.0227439
					0.0227439
					0.0227439
					0.0227439
					0.0227439
					0.0227439
					0.0227439
					0.0227439
					0.0227439
					0.0227439
					0.0227439
					0.0227439
					0.0227439
					0.0227439
					0.0227439
					0.0227439
					0.0227439
					0.0227439
					0.0227439
					0.0227439
					0.0227439
					0.0227439
					0.0227439
					0.0227439
					0.0227439
					0.0227439
					0.0227439
					0.0227439
					0.0227439
					0.0227439
					0.0227439
					0.0227439
					0.0227439
					0.0227439
					0.0227439
					0.0227439
					0.0227439
					0.0227439
					0.0227439
					0.0227439
					0.0227439
					0.0227439
					0.0227439
					0.0227439
					0.0227439
					0.0227439
					0.0227439
					0.0227439
					0.0227439
					0.0227439
					0.0227439
					0.0227439
					0.0227439
					0.0227439
					0.0227439
					0.0227439
					0.0227439
					0.0227439
					0.0227439
					0.0227439
					0.0227439
					0.0227439
					0.0227439
					0.0227439
					0.0227439
					0.0227439
					0.0227439
					0.0227439
					0.0227439
					0.0227439
					0.0227439
					0.0227439
					0.0227439
					0.0227439
					0.0227439
					0.0227439
					0.0227439
					0.0227439
					0.0227439
					0.0227439
					0.0227439
					0.0227439
					0.0227439
					0.0227439
					0.0227439
					0.0227439
					0.0227439
					0.0227439
					0.0227439
					0.0227439
					0.0227439
					0.0227439
					0.0227439
					0.0227439
					0.0227439
					0.0227439
					0.0227439
					0.0227439
					0.0227439
					0.0227439
					0.0227439
					0.0227439
					0.0227439
					0.0227439
					0.0227439
					0.0227439
					0.0227439
					0.0227439
					0.0227439
					0.0227439
					0.0227439
					0.0227439
					0.0227439
					0.0227439
					0.0227439
					0.0227439
					0.0227439
					0.0227439
					0.0227439
					0.0227439
					0.0227439
					0.0227439
					0.0227439
					0.0227439
					0.0227439
					0.0227439
					0.0227439
					0.0227439
					0.0227439
					0.0227439
					0.0227439
					0.0227439
					0.0227439
					0.0227439
					0.0227439
					0.0227439
					0.0227439
					0.0227439
					0.0227439
					0.0227439
					0.0227439
					0.0227439
					0.0227439
					0.0227439
					0.0227439
					0.0227439
					0.0227439
					0.0227439
					0.0227439
					0.0227439
					0.0227439
					0.0227439
					0.0227439
					0.0227439
					0.0227439
					0.0227439
					0.0227439
					0.0227439
					0.0227439
					0.0227439
					0.0227439
					0.0227439
					0.0227439
					0.0227439
					0.0227439
					0.0227439
					0.0227439
					0.0227439
					0.0227439
					0.0227439
					0.0227439
					0.0227439
					0.0227439
					0.0227439
					0.0227439
					0.0227439
					0.0227439
					0.0227439
					0.0227439
					0.0227439
					0.0227439
					0.0227439
					0.0227439
					0.0227439
					0.0227439
					0.0227439
					0.0227439
					0.0227439
					0.0227439
					0.0227439
					0.0227439
					0.0227439
					0.0227439
					0.0227439
					0.0227439
					0.0227439
					0.0227439
					0.0227439
					0.0227439
					0.0227439
					0.0227439
					0.0227439
					0.0227439
					0.0227439
					0.0227439
					0.0227439
					0.0227439
					0.0227439
					0.0227439
					0.0227439
					0.0227439
					0.0227439
					0.0227439
					0.0227439
					0.0227439
					0.0227439
					0.0227439
					0.0227439
					0.0227439
					0.0227439
					0.0227439
					0.0227439
					0.0227439
					0.0227439
					0.0227439
					0.0227439
					0.0227439
					0.0227439
					0.0227439
					0.0227439
					0.0227439
					0.0227439
					0.0227439
					0.0227439
					0.0227439
					0.0227439
					0.0227439
					0.0227439
					0.0227439
					0.0227439
					0.0227439
					0.0227439
					0.0227439
					0.0227439
					0.0227439
					0.0227439
					0.0227439
					0.0227439
					0.0227439
					0.0227439
					0.0227439
					0.0227439
					0.0227439
					0.0227439
					0.0227439
					0.0227439
					0.0227439
					0.0227439
					0.0227439
					0.0227439
					0.0227439
					0.0227439
					0.0227439
					0.0227439
					0.0227439
					0.0227439
					0.0227439
					0.0227439
					0.0227439
					0.0227439
					0.0227439
					0.0227439
					0.0227439
					0.0227439
					0.0227439
					0.0227439
					0.0227439
					0.0227439
					0.0227439
					0.0227439
					0.0227439
					0.0227439
					0.0227439
					0.0227439
					0.0227439
					0.0227439
					0.0227439
					0.0227439
					0.0227439
					0.0227439
					0.0227439
					0.0227439
					0.0227439
					0.0227439
					0.0227439
					0.0227439
					0.0227439
					0.0227439
					0.0227439
					0.0227439
					0.0227439
					0.0227439
					0.0227439
					0.0227439
					0.0227439
					0.0227439
					0.0227439
					0.0227439
					0.0227439
					0.0227439
					0.0227439
					0.0227439
					0.0227439
					0.0227439
					0.0227439
					0.0227439
					0.0227439
					0.0227439
					0.0227439
					0.0227439
					0.0227439
					0.0227439
					0.0227439
					0.0227439
					0.0227439
					0.0227439
					0.0227439
					0.0227439
					0.0227439
					0.0227439
					0.0227439
					0.0227439
					0.0227439
					0.0227439
					0.0227439
					0.0227439
					0.0227439
					0.0227439
					0.0227439
					0.0227439
					0.0227439
					0.0227439
					0.0227439
					0.0227439
					0.0227439
					0.0227439
					0.0227439
					0.0227439
					0.0227439
					0.0227439
					0.0227439
					0.0227439
					0.0227439
					0.0227439
					0.0227439
					0.0227439
					0.0227439
					0.0227439
					0.0227439
					0.0227439
					0.0227439
					0.0227439
					0.0227439
					0.0227439
					0.0227439
					0.0227439
					0.0227439
					0.0227439
					0.0227439
					0.0227439
					0.0227439
					0.0227439
					0.0227439
					0.0227439
					0.0227439
					0.0227439
					0.0227439
					0.0227439
					0.0227439
					0.0227439
					0.0227439
					0.0227439
					0.0227439
					0.0227439
					0.0227439
					0.0227439
					0.0227439
					0.0227439
					0.0227439
					0.0227439
					0.0227439
					0.0227439
					0.0227439
					0.0227439
					0.0227439
					0.0227439
					0.0227439
					0.0227439
					0.0227439
					0.0227439
					0.0227439
					0.0227439
					0.0227439
					0.0227439
					0.0227439
					0.0227439
					0.0227439
					0.0227439
					0.0227439
					0.0227439
					0.0227439
					0.0227439
					0.0227439
					0.0227439
					0.0227439
					0.0227439
					0.0227439
					0.0227439
					0.0227439
					0.0227439
					0.0227439
					0.0227439
					0.0227439
					0.0227439
					0.0227439
					0.0227439
					0.0227439
					0.0227439
					0.0227439
					0.0227439
					0.0227439
					0.0227439
					0.0227439
					0.0227439
					0.0227439
					0.0227439
					0.0227439
					0.0227439
					0.0227439
					0.0227439
					0.0227439
					0.0227439
					0.0227439
					0.0227439
					0.0227439
					0.0227439
					0.0227439
					0.0227439
					0.0227439
					0.0227439
					0.0227439
					0.0227439
					0.0227439
					0.0227439
					0.0227439
					0.0227439
					0.0227439
					0.0227439
					0.0227439
					0.0227439
					0.0227439
					0.0227439
					0.0227439
					0.0227439
					0.0227439
					0.0227439
					0.0227439
					0.0227439
					0.0227439
					0.0227439
					0.0227439
					0.0227439
					0.0227439
					0.0227439
					0.0227439
					0.0227439
					0.0227439
					0.0227439
					0.0227439
					0.0227439
					0.0227439
					0.0227439
					0.0227439
					0.0227439
					0.0227439
					0.0227439
					0.0227439
					0.0227439
					0.0227439
					0.0227439
					0.0227439
					0.0227439
					0.0227439
					0.0227439
					0.0227439
					0.0227439
					0.0227439
					0.0227439
					0.0227439
					0.0227439
					0.0227439
					0.0227439
					0.0227439
					0.0227439
					0.0227439
					0.0227439
					0.0227439
					0.0227439
					0.0227439
					0.0227439
					0.0227439
					0.0227439
					0.0227439
					0.0227439
					0.0227439
					0.0227439
					0.0227439
					0.0227439
					0.0227439
					0.0227439
					0.0227439
					0.0227439
					0.0227439
					0.0227439
					0.0227439
					0.0227439
					0.0227439
					0.0227439
					0.0227439
					0.0227439
					0.0227439
					0.0227439
					0.0227439
					0.0227439
					0.0227439
					0.0227439
					0.0227439
					0.0227439
					0.0227439
					0.0227439
					0.0227439
					0.0227439
					0.0227439
					0.0227439
					0.0227439
					0.0227439
					0.0227439
					0.0227439
					0.0227439
					0.0227439
					0.0227439
					0.0227439
					0.0227439
					0.0227439
					0.0227439
					0.0227439
					0.0227439
					0.0227439
					0.0227439
					0.0227439
					0.0227439
					0.0227439
					0.0227439
					0.0227439
					0.0227439
					0.0227439
					0.0227439
					0.0227439
					0.0227439
					0.0227439
					0.0227439
					0.0227439
					0.0227372
					0.0229334
					0.0233918
					0.0241109
					0.024954
					0.0267067
					0.0289667
					0.031509
					0.0341292
					0.0390376
					0.0461481
					0.0542633
					0.0629243
					0.0734085
					0.0900205
					0.107718
					0.125794
					0.144324
					0.165245
					0.187055
					0.210714
					0.234983
					0.256667
					0.276535
					0.296279
					0.31526
					0.333371
					0.35079
					0.367605
					0.383774
					0.399236
					0.413946
					0.427874
					0.441003
					0.453326
					0.46486
					0.475639
					0.485686
					0.494987
					0.503493
					0.511111
					0.517688
					0.523042
					0.52703
					0.529495
					0.530268
					0.52924
					0.526325
					0.521484
					0.514725
					0.506133
					0.495985
					0.48459
					0.472081
					0.458586
					0.444226
					0.429129
					0.413426
					0.39726
					0.380796
					0.364237
					0.347788
					0.33164
					0.315974
					0.300916
					0.286528
					0.272808
					0.259699
					0.247124
					0.23544
					0.223536
					0.211824
					0.200485
					0.189729
					0.179172
					0.168655
					0.158169
					0.14791
					0.137649
					0.127251
					0.11672
					0.107324
					0.0990106
					0.0914935
					0.08386
					0.0761988
					0.0685527
					0.0608993
					0.0545398
					0.0499923
					0.0458952
					0.0419981
					0.0382454
					0.0346167
					0.0317317
					0.0303492
					0.0291818
					0.0280531
					0.0269426
					0.0260103
					0.0250992
					0.024261
					0.0236666
					0.023256
					0.0228725
					0.0226711
					0.0224735
					0.0222811
					0.0221549
					0.0221549
					0.0221549
					0.0221549
					0.0221549
					0.0221549
					0.0221549
					0.0221549
					0.0221549
					0.0221549
					0.0221549
					0.0221549
					0.0221549
					0.0221549
					0.0221549
					0.0221549
					0.0221549
					0.0221549
					0.0221549
					0.0221549
					0.0221549
					0.0221549
					0.0221549
					0.0221549
					0.0221549
					0.0221549
					0.0221549
					0.0221549
					0.0221549
					0.0221549
					0.0221549
					0.0221549
					0.0221549
					0.0221549
					0.0221549
					0.0221549
					0.0221549
					0.0221549
					0.0221549
					0.0221549
					0.0221549
					0.0221549
					0.0221549
					0.0221549
					0.0221549
					0.0221549
					0.0221549
					0.0221549
					0.0221549
					0.0221549
					0.0221549
					0.0221549
					0.0221549
					0.0221549
					0.0221549
					0.0221549
					0.0221549
					0.0221549
					0.0221549
					0.0221549
					0.0221549
					0.0221549
					0.0221549
					0.0221549
					0.0221549
					0.0221549
					0.0221549
					0.0221549
					0.0221549
					0.0221549
					0.0221549
					0.0221549
					0.0221549
					0.0221549
					0.0221549
					0.0221549
					0.0221549
					0.0221549
					0.0221549
					0.0221549
					0.0221549
					0.0221549
					0.0221549
					0.0221549
					0.0221549
					0.0221549
					0.0221549
					0.0221549
					0.0221549
					0.0221549
					0.0221549
					0.0221549
					0.0221549
					0.0221549
					0.0221549
					0.0221549
					0.0221549
					0.0221549
					0.0221549
					0.0221549
					0.0221549
					0.0221549
					0.0221549
					0.0221549
					0.0221549
					0.0221549
					0.0221549
					0.0221549
					0.0221549
					0.0221549
					0.0221549
					0.0221549
					0.0221549
					0.0221549
					0.0221549
					0.0221549
					0.0221549
					0.0221549
					0.0221549
					0.0221549
					0.0221549
					0.0221549
					0.0221549
					0.0221549
					0.0221549
					0.0221549
					0.0221549
					0.0221549
					0.0221549
					0.0221549
					0.0221549
					0.0221549
					0.0221549
					0.0221549
					0.0221549
					0.0221549
					0.0221549
					0.0221549
					0.0221549
					0.0221549
					0.0221549
					0.0221549
					0.0221549
					0.0221549
					0.0221549
					0.0221549
					0.0221549
					0.0221549
					0.0221549
					0.0221549
					0.0221549
					0.0221549
					0.0221549
					0.0221549
					0.0221549
					0.0221549
					0.0221549
					0.0221549
					0.0221549
					0.0221549
					0.0221549
					0.0221549
					0.0221549
					0.0221549
					0.0221549
					0.0221549
					0.0221549
					0.0221549
					0.0221549
					0.0221549
					0.0221549
					0.0221549
					0.0221549
					0.0221549
					0.0221549
					0.0221549
					0.0221549
					0.0221549
					0.0221549
					0.0221549
					0.0221549
					0.0221549
					0.0221549
					0.0221549
					0.0221549
					0.0221549
					0.0221549
					0.0221549
					0.0221549
					0.0221549
					0.0221549
					0.0221549
					0.0221549
					0.0221549
					0.0221549
					0.0221549
					0.0221549
					0.0221549
					0.0221549
					0.0221549
					0.0221549
					0.0221549
					0.0221549
					0.0221549
					0.0221549
					0.0221549
					0.0221549
					0.0221549
					0.0221549
					0.0221549
					0.0221549
					0.0221549
					0.0221549
					0.0221549
					0.0221549
					0.0221549
					0.0221549
					0.0221549
					0.0221549
					0.0221549
					0.0221549
					0.0221549
					0.0221549
					0.0221549
					0.0221549
					0.0221549
					0.0221549
					0.0221549
					0.0221549
					0.0221549
					0.0221549
					0.0221549
					0.0221549
					0.0221549
					0.0221549
					0.0221549
					0.0221549
					0.0221549
					0.0221549
					0.0221549
					0.0221549
					0.0221549
					0.0221549
					0.0221549
					0.0221549
					0.0221549
					0.0221549
					0.0221549
					0.0221549
					0.0221549
					0.0221549
					0.0221549
					0.0221549
					0.0221549
					0.0221549
					0.0221549
					0.0221549
					0.0221549
					0.0221549
					0.0221549
					0.0221549
					0.0221549
					0.0221549
					0.0221549
					0.0221549
					0.0221549
					0.0221549
					0.0221549
					0.0221549
					0.0221549
					0.0221549
					0.0221549
					0.0221549
					0.0221549
					0.0221549
					0.0221549
					0.0221549
					0.0221549
					0.0221549
					0.0221549
					0.0221549
					0.0221549
					0.0221549
					0.0221549
					0.0221549
					0.0221549
					0.0221549
					0.0221549
					0.0221549
					0.0221549
					0.0221549
					0.0221549
					0.0221549
					0.0221549
					0.0221549
					0.0221549
					0.0221549
					0.0221549
					0.0221549
					0.0221549
					0.0221549
					0.0221549
					0.0221549
					0.0221549
					0.0221549
					0.0221549
					0.0221549
					0.0221549
					0.0221549
					0.0221549
					0.0221549
					0.0221549
					0.0221549
					0.0221549
					0.0221549
					0.0221549
					0.0221549
					0.0221549
					0.0221549
					0.0221549
					0.0221549
					0.0221549
					0.0221549
					0.0221549
					0.0221549
					0.0221549
					0.0221549
					0.0221549
					0.0221549
					0.0221549
					0.0221549
					0.0221549
					0.0221549
					0.0221549
					0.0221549
					0.0221549
					0.0221549
					0.0221549
					0.0221549
					0.0221549
					0.0221549
					0.0221549
					0.0221549
					0.0221549
					0.0221549
					0.0221549
					0.0221549
					0.0221549
					0.0221549
					0.0221549
					0.0221549
					0.0221549
					0.0221549
					0.0221549
					0.0221549
					0.0221549
					0.0221549
					0.0221549
					0.0221549
					0.0221549
					0.0221549
					0.0221549
					0.0221549
					0.0221549
					0.0221549
					0.0221549
					0.0221549
					0.0221549
					0.0221549
					0.0221549
					0.0221549
					0.0221549
					0.0221549
					0.0221549
					0.0221549
					0.0221549
					0.0221549
					0.0221549
					0.0221549
					0.0221549
					0.0221549
					0.0221549
					0.0221549
					0.0221549
					0.0221549
					0.0221549
					0.0221549
					0.0221549
					0.0221549
[truncated: 1,264 more rows]
