# Supplementary material for: Numerical study of hydrodynamic and salinity transport processes in the Pink Beach wetlands of the Liao River estuary, China
Source: Copernicus journal article supplement (doi:10.5194/os-14-437-2018), 2018-06-11
Supplement: Supplementary file 25 [file Salinity and depth of G2.xls]

## Sheet: Salinity
	0.03	Modeled	30.5527		0	Non-vegetated	30.5394
Measured	0.04		30.5527		2		30.5394
	0.03		30.5527		4		30.5394
	0.03		30.5527		6		30.5394
	34.76		30.5527		8		30.5394
	33.4		30.5528		10		30.5394
	31.58		30.5504		12		30.5394
	30.54		30.5463		14		30.5394
	30.02		30.5403		16		30.5394
	29.88		30.5334		18		30.5394
	30.07		30.5247		20		30.5394
	32.55		30.5137		22		30.5394
	30.4		30.5026		24		30.5394
	29.67		30.4919		26		30.5394
	29.51		30.4827		28		30.5394
	29.43		30.475		30		30.5394
	29.43		30.4691		32		30.5394
	29.42		30.465		34		30.5394
	29.41		30.4625		36		30.5394
	29.41		30.4614		38		30.5394
	29.4		30.4613		40		30.5394
	29.39		30.462		42		30.5394
	29.39		30.4633		44		30.5394
	29.38		30.4652		46		30.5394
	29.38		30.4674		48		30.5394
	29.38		30.47		50		30.5394
	29.38		30.4729		52		30.5394
	29.51		30.4761		54		30.5394
	29.58		30.4796		56		30.5394
	29.66		30.4833		58		30.5394
	29.68		30.4871		60		30.5394
	29.67		30.491		62		30.5394
	29.61		30.495		64		30.5394
	29.61		30.499		66		30.5394
	29.62		30.5029		68		30.5394
	29.63		30.5068		70		30.5394
	29.61		30.5107		72		30.5394
	29.6		30.5145		74		30.5394
	29.63		30.5182		76		30.5394
	29.66		30.5218		78		30.5394
	29.73		30.5254		80		30.5394
	29.72		30.5289		82		30.5394
	29.75		30.5323		84		30.5394
	29.87		30.5355		86		30.5394
	29.9		30.5386		88		30.5394
	29.89		30.5415		90		30.5394
	29.92		30.5442		92		30.5394
	29.82		30.5466		94		30.5394
	29.83		30.5488		96		30.5394
	29.89		30.5507		98		30.5394
	29.97		30.5523		100		30.5394
	29.98		30.5536		102		30.5394
	30		30.5546		104		30.5394
	29.89		30.5553		106		30.5394
	29.79		30.5556		108		30.5394
	29.95		30.5556		110		30.5394
	30.05		30.5553		112		30.5394
	30.12		30.5547		114		30.5394
	30.17		30.5537		116		30.5394
	30.26		30.5525		118		30.5394
	30.31		30.551		120		30.5394
	30.37		30.5493		122		30.5394
	30.39		30.5475		124		30.5394
	30.34		30.5454		126		30.5394
	30.28		30.5433		128		30.5363
	30.27		30.5411		130		30.5283
	30.34		30.5388		132		30.515
	30.35		30.5365		134		30.4994
	30.24		30.534		136		30.4778
	30.21		30.5315		138		30.456
	30.19		30.5288		140		30.4356
	30.19		30.5261		142		30.4184
	30.22		30.5232		144		30.4045
	30.26		30.5202		146		30.3941
	30.26		30.5171		148		30.3868
	30.24		30.514		150		30.3822
	30.23		30.5113		152		30.3796
	30.12		30.5089		154		30.3786
	29.97		30.5073		156		30.3788
	29.86		30.5058		158		30.3801
	29.83		30.5044		160		30.3823
	29.84		30.5039		162		30.3852
	29.87		30.5038		164		30.3888
	29.89		30.5037		166		30.393
	29.92		30.5034		168		30.3979
	29.94		30.5034		170		30.4035
	29.95		30.5034		172		30.4097
	29.98		30.5034		174		30.4164
	30		30.5034		176		30.4237
	29.97		30.5034		178		30.4314
	29.96		30.5034		180		30.4394
	29.96		30.5034		182		30.4478
	29.95		30.5034		184		30.4564
	29.94		30.5034		186		30.4653
	29.93		30.5034		188		30.4744
	29.93		30.5034		190		30.4837
	29.94		30.5034		192		30.4931
	29.96		30.5034		194		30.5027
	29.99		30.5034		196		30.5123
	30.05		30.5034		198		30.5218
	30.11		30.5034		200		30.5313
	30.16		30.5034		202		30.5405
	30.23		30.5034		204		30.5494
	30.28		30.5034		206		30.558
	30.32		30.5034		208		30.5662
	30.37		30.5034		210		30.574
	30.4		30.5034		212		30.5814
	30.42		30.5034		214		30.5883
	30.43		30.5034		216		30.5947
	30.44		30.5034		218		30.6006
	30.44		30.5034		220		30.6059
	30.44		30.5034		222		30.6107
	30.44		30.5034		224		30.6149
	30.43		30.5034		226		30.6186
	30.42		30.5034		228		30.6217
	30.41		30.5034		230		30.6241
	30.4		30.5034		232		30.6259
	30.41		30.5034		234		30.6271
	30.41		30.5034		236		30.6277
	30.42		30.5034		238		30.6276
	30.42		30.5034		240		30.6269
	30.41		30.5034		242		30.6258
	30.41		30.5034		244		30.624
	30.42		30.5034		246		30.6215
	29.75		30.5034		248		30.6184
	18.03		0		250		0
	1.24		0		252		0
	0.6		0		254		0
	0.59		0		256		0
	0.59		0		258		0
	0.59		0		260		0
	0.58		0		262		0
	0.58		0		264		0
	0.58		0		266		0
	0.58		0		268		0
	0.58		0		270		0
	0.58		0		272		0
	0.58		0		274		0
	0.57		0		276		0
	0.57		0		278		0
	0.57		0		280		0
	0.57		0		282		0
	0.57		0		284		0
	0.56		0		286		0
	0.56		0		288		0
	0.56		0		290		0
	0.56		0		292		0
	0.55		0		294		0
	0.55		0		296		0
	0.55		0		298		0
	0.55		0		300		0
	0.54		0		302		0
	0.54		0		304		0
	0.54		0		306		0
	0.53		0		308		0
	0.53		0		310		0
	0.53		0		312		0
	0.52		0		314		0
	0.52		0		316		0
	0.52		0		318		0
	0.51		0		320		0
	0.51		0		322		0
	0.5		0		324		0
	0.5		0		326		0
	0.5		0		328		0
	0.49		0		330		0
	0.49		0		332		0
	0.49		0		334		0
	0.48		0		336		0
	0.48		0		338		0
	0.48		0		340		0
	0.47		0		342		0
	0.47		0		344		0
	0.47		0		346		0
	0.46		0		348		0
	0.46		0		350		0
	0.46		0		352		0
	0.45		0		354		0
	0.45		0		356		0
	0.45		0		358		0
	0.44		0		360		0
	0.44		0		362		0
	0.44		0		364		0
	0.43		0		366		0
	0.43		0		368		0
	0.43		0		370		0
	0.43		0		372		0
	0.43		0		374		0
	0.42		0		376		0
	0.42		0		378		0
	0.42		0		380		0
	0.42		0		382		0
	0.42		0		384		0
	0.41		0		386		0
	0.41		0		388		0
	0.41		0		390		0
	0.41		0		392		0
	0.4		0		394		0
	0.4		0		396		0
	0.4		0		398		0
	0.39		0		400		0
	0.39		0		402		0
	0.39		0		404		0
	0.39		0		406		0
	0.39		0		408		0
	0.39		0		410		0
	0.39		0		412		0
	0.39		0		414		0
	0.39		0		416		0
	0.39		0		418		0
	0.39		0		420		0
	0.4		0		422		0
	0.4		0		424		0
	0.4		0		426		0
	0.4		0		428		0
	0.4		0		430		0
	0.4		0		432		0
	0.4		0		434		0
	0.4		0		436		0
	0.4		0		438		0
	0.4		0		440		0
	0.4		0		442		0
	0.4		0		444		0
	0.4		0		446		0
	0.4		0		448		0
	0.4		0		450		0
	0.4		0		452		0
	0.4		0		454		0
	0.4		0		456		0
	0.4		0		458		0
	0.4		0		460		0
	0.4		0		462		0
	0.4		0		464		0
	0.4		0		466		0
	0.4		0		468		0
	0.41		0		470		0
	0.41		0		472		0
	0.41		0		474		0
	0.41		0		476		0
	0.41		0		478		0
	0.41		0		480		0
	0.41		0		482		0
	0.41		0		484		0
	0.42		0		486		0
	0.42		0		488		0
	0.42		0		490		0
	0.42		0		492		0
	0.42		0		494		0
	0.42		0		496		0
	0.42		0		498		0
	0.42		0		500		0
	0.42		0		502		0
	0.43		0		504		0
	0.43		0		506		0
	0.43		0		508		0
	0.43		0		510		0
	0.43		0		512		0
	0.43		0		514		0
	0.43		0		516		0
	0.43		0		518		0
	0.43		0		520		0
	0.43		0		522		0
	0.42		0		524		0
	0.42		0		526		0
	0.42		0		528		0
	0.42		0		530		0
	0.42		0		532		0
	0.42		0		534		0
	0.42		0		536		0
	0.42		0		538		0
	0.42		0		540		0
	0.42		0		542		0
	0.42		0		544		0
	0.42		0		546		0
	0.42		0		548		0
	0.42		0		550		0
	0.42		0		552		0
	0.43		0		554		0
	0.43		0		556		0
	0.43		0		558		0
	0.43		0		560		0
	0.43		0		562		0
	0.44		0		564		0
	0.44		0		566		0
	0.44		0		568		0
	0.43		0		570		0
	0.43		0		572		0
	0.43		0		574		0
	0.43		0		576		0
	0.42		0		578		0
	0.42		0		580		0
	0.42		0		582		0
	0.42		0		584		0
	0.42		0		586		0
	0.42		0		588		0
	0.42		0		590		0
	0.42		0		592		0
	0.42		0		594		0
	0.41		0		596		0
	0.41		0		598		0
	0.41		0		600		0
	0.41		0		602		0
	0.41		0		604		0
	0.4		0		606		0
	0.4		0		608		0
	0.39		0		610		0
	0.39		0		612		0
	0.38		0		614		0
	0.37		0		616		0
	0.36		0		618		0
	0.35		0		620		0
	0.35		0		622		0
	0.35		0		624		0
	0.34		0		626		0
	0.34		0		628		0
	0.34		0		630		0
	0.33		0		632		0
	0.33		0		634		0
	0.33		0		636		0
	0.33		0		638		0
	0.33		0		640		0
	0.32		0		642		0
	0.32		0		644		0
	0.32		0		646		0
	0.32		0		648		0
	0.31		0		650		0
	0.31		0		652		0
	0.31		0		654		0
	0.3		0		656		0
	0.3		0		658		0
	0.29		0		660		0
	0.29		0		662		0
	0.28		0		664		0
	0.28		0		666		0
	0.27		0		668		0
	0.27		0		670		0
	0.27		0		672		0
	0.27		0		674		0
	0.27		0		676		0
	0.27		0		678		0
	0.26		0		680		0
	0.26		0		682		0
	0.26		0		684		0
	0.26		0		686		0
	0.25		0		688		0
	0.25		0		690		0
	0.25		0		692		0
	0.25		0		694		0
	0.25		0		696		0
	0.24		0		698		0
	0.24		0		700		0
	0.24		0		702		0
	0.24		0		704		0
	0.24		0		706		0
	0.24		0		708		0
	0.23		0		710		0
	0.23		0		712		0
	0.23		0		714		0
	0.23		0		716		0
	0.22		0		718		0
	0.23		0		720		0
	0.22		0		722		0
	0.22		0		724		0
	0.22		0		726		0
	0.22		0		728		0
	0.22		0		730		0
	0.22		0		732		0
	0.22		0		734		0
	0.22		0		736		0
	0.22		0		738		0
	0.22		0		740		0
	0.21		0		742		0
	0.21		0		744		0
	0.21		0		746		0
	0.21		0		748		0
	0.21		0		750		0
	0.21		0		752		0
	0.21		0		754		0
	0.21		0		756		0
	0.21		0		758		0
	0.2		0		760		0
	0.2		0		762		0
	0.19		0		764		0
	0.19		0		766		0
	0.19		0		768		0
	0.18		0		770		0
	0.18		0		772		0
	0.17		0		774		0
	0.17		0		776		0
	0.17		0		778		0
	0.16		0		780		0
	0.16		0		782		0
	0.16		0		784		0
	0.16		0		786		0
	0.16		0		788		0
	0.15		0		790		0
	0.15		0		792		0
	0.15		0		794		0
	0.14		0		796		0
	0.14		0		798		0
	0.14		0		800		0
	0.14		0		802		0
	0.14		0		804		0
	0.13		0		806		0
	0.13		0		808		0
	0.13		0		810		0
	0.13		0		812		0
	0.13		0		814		0
	0.12		0		816		0
	0.13		0		818		0
	0.13		0		820		0
	0.13		0		822		0
	0.13		0		824		0
	0.13		0		826		0
	0.13		0		828		0
	0.12		0		830		0
	0.12		0		832		0
	0.12		0		834		0
	0.12		0		836		0
	0.11		0		838		0
	0.11		0		840		0
	0.11		0		842		0
	0.1		0		844		0
	0.1		0		846		0
	0.1		0		848		0
	0.1		0		850		0
	0.1		0		852		0
	0.1		0		854		0
	0.09		0		856		0
	0.09		0		858		0
	0.1		0		860		0
	0.1		0		862		0
	0.1		0		864		0
	0.1		0		866		0
	0.11		0		868		0
	0.12		0		870		0
	0.12		0		872		0
	0.12		0		874		0
	0.11		0		876		0
	0.11		0		878		0
	0.11		0		880		0
	0.11		0		882		0
	0.1		0		884		0
	0.1		0		886		0
	0.1		0		888		0
	0.09		0		890		0
	0.09		0		892		0
	0.09		0		894		0
	0.09		0		896		0
	0.09		0		898		0
	0.08		0		900		0
	0.08		0		902		0
	0.08		0		904		0
	0.08		0		906		0
	0.07		0		908		0
	0.07		0		910		0
	0.07		0		912		0
	0.07		0		914		0
	0.02		0		916		0
	0		0		918		0
	0.01		0		920		0
	0.01		0		922		0
	0.01		0		924		0
	0.01		0		926		0
	0.01		0		928		0
			0		930		0
			0		932		0
			0		934		0
			0		936		0
			0		938		0
			0		940		0
			0		942		0
			0		944		0
			0		946		0
			0		948		0
			0		950		0
			0		952		0
			0		954		0
			0		956		0
			0		958		0
			0		960		0
			0		962		0
			0		964		0
			0		966		0
			0		968		0
			0		970		0
			0		972		0
			0		974		0
			0		976		0
			0		978		0
			0		980		0
			0		982		0
			0		984		0
			0		986		0
			0		988		0
			0		990		0
			0		992		0
			0		994		0
			0		996		0
			0		998		0
			0		1000		0
			0		1002		0
			0		1004		0
			0		1006		0
			0		1008		0
			0		1010		0
			0		1012		0
			0		1014		0
			0		1016		0
			0		1018		0
			0		1020		0
			0		1022		0
			0		1024		0
			0		1026		0
			0		1028		0
			0		1030		0
			0		1032		0
			0		1034		0
			0		1036		0
			0		1038		0
			0		1040		0
			0		1042		0
			0		1044		0
			0		1046		0
			0		1048		0
			0		1050		0
			0		1052		0
			0		1054		0
			0		1056		0
			0		1058		0
			0		1060		0
			0		1062		0
			0		1064		0
			0		1066		0
			0		1068		0
			0		1070		0
			0		1072		0
			0		1074		0
			0		1076		0
			0		1078		0
			0		1080		0
			0		1082		0
			0		1084		0
			0		1086		0
			0		1088		0
			0		1090		0
			0		1092		0
			0		1094		0
			0		1096		0
			0		1098		0
			0		1100		0
			0		1102		0
			0		1104		0
			0		1106		0
			0		1108		0
			0		1110		0
			0		1112		0
			0		1114		0
			0		1116		0
			0		1118		0
			0		1120		0
			0		1122		0
			0		1124		0
			0		1126		0
			0		1128		0
			0		1130		0
			0		1132		0
			0		1134		0
			0		1136		0
			0		1138		0
			0		1140		0
			0		1142		0
			0		1144		0
			0		1146		0
			0		1148		0
			0		1150		0
			0		1152		0
			0		1154		0
			0		1156		0
			0		1158		0
			0		1160		0
			0		1162		0
			0		1164		0
			0		1166		0
			0		1168		0
			0		1170		0
			0		1172		0
			0		1174		0
					1176		0
					1178		0
					1180		0
					1182		0
					1184		0
					1186		0
					1188		0
					1190		0
					1192		0
					1194		0
					1196		0
					1198		0
					1200		0
							0
							0
							0
							0
							0
							0
							0
							0
							0
							0
							0
							0
							0
							0
							0
							0
							0
							0
							0
							0
							0
							0
							0
							0
							0
							0
							0
							0
							0
							0
							0
							0
							0
							0
							0
							0
							0
							0
							0
							0
							0
							0
							0
							0
							0
							0
							0
							0
							0
							0
							0
							0
							0
							0
							0
							0
							0
							0
							0
							0
							0
							0
							0
							0
							0
							0
							0
							0
							0
							0
							0
							0
							0
							0
							0
							0
							0
							0
							0
							0
							0
							0
							0
							0
							0
							0
							0
							0
							0
							0
							0
							0
							0
							0
							0
							0
							0
							0
							0
							0
							0
							0
							0
							0
							0
							0
							0
							0
							0
							0
							0
							0
							0
							0
							0
							0
							0
							0
							0
							0
							0
							0
							0
							0
							0
							0
							0
							0
							0
							0
							0
							0
							0
							0
							0
							0
							0
							0
							0
							0
							0
							0
							0
							0
							0
							0
							0
							0
							0
							0
							0
							0
							0
							0
							0
							0
							0
							0
							0
							0
							0
							0
							0
							0
							0
							0
							0
							0
							0
							0
							0
							0
							0
							0
							0
							0
							0
							0
							0
							0
							0
							0
							0
							0
							0
							0
							0
							0
							0
							0
							0
							0
							0
							0
							0
							0
							0

## Sheet: Depth
Depth	-0.194	-0.094	Modeled	-42	-76	0.069709	-82	0	Non-vegetated	0.0679837
	-0.193	-0.093	7.2612	-40	-74	0.069709	-80	2		0.0679837
	-0.187	-0.087		-38	-72	0.069709	-78	4		0.0679837
	-0.189	-0.089		-36	-70	0.069709	-76	6		0.0679837
	-0.184	-0.084		-34	-68	0.069709	-74	8		0.0679837
	-0.184	-0.084		-32	-66	0.069709	-72	10		0.0679837
	-0.147	-0.047		-30	-64	0.069709	-70	12		0.0679837
	-0.122	-0.022		-28	-62	0.069709	-68	14		0.0679837
	-0.093	0.007		-26	-60	0.069709	-66	16		0.0679837
	-0.055	0.045		-24	-58	0.069709	-64	18		0.0679837
	-0.014	0.086		-22	-56	0.069709	-62	20		0.0679837
	0.03	0.13		-20	-54	0.069709	-60	22		0.0679837
	0.074	0.174		-18	-52	0.069709	-58	24		0.0679837
	0.134	0.234		-16	-50	0.069709	-56	26		0.0679837
	0.197	0.297		-14	-48	0.069709	-54	28		0.0679837
	0.282	0.382		-12	-46	0.069709	-52	30		0.0679837
	0.349	0.449		-10	-44	0.069709	-50	32		0.0679837
	0.388	0.488		-8	-42	0.069709	-48	34		0.0679837
	0.411	0.511		-6	-40	0.069709	-46	36		0.0679837
	0.422	0.522		-4	-38	0.069709	-44	38		0.0679837
	0.437	0.537		-2	-36	0.069709	-42	40		0.0679837
	0.456	0.556		0	-34	0.069709	-40	42		0.0679837
	0.471	0.571		2	-32	0.069709	-38	44		0.0679837
	0.479	0.579		4	-30	0.069709	-36	46		0.0679837
	0.49	0.59		6	-28	0.069709	-34	48		0.0679837
	0.502	0.602		8	-26	0.069709	-32	50		0.0679837
	0.505	0.605		10	-24	0.069709	-30	52		0.0679837
	0.508	0.608		12	-22	0.069709	-28	54		0.0679837
	0.517	0.617		14	-20	0.069709	-26	56		0.0679837
	0.534	0.634		16	-18	0.069709	-24	58		0.0679837
	0.552	0.652		18	-16	0.069709	-22	60		0.0679837
	0.562	0.662		20	-14	0.069709	-20	62		0.0679837
	0.569	0.669		22	-12	0.069709	-18	64		0.0679837
	0.578	0.678		24	-10	0.069709	-16	66		0.0679837
	0.582	0.682		26	-8	0.069709	-14	68		0.0679837
	0.582	0.682		28	-6	0.069709	-12	70		0.0679837
	0.581	0.681		30	-4	0.069709	-10	72		0.0679837
	0.579	0.679		32	-2	0.069709	-8	74		0.0679837
	0.574	0.674		34	0	0.069709	-6	76		0.0679837
	0.575	0.675		36	2	0.069709	-4	78		0.0679837
	0.57	0.67		38	4	0.069709	-2	80		0.0679837
	0.558	0.658		40	6	0.069709	0	82		0.0679837
	0.554	0.654		42	8	0.0697731	2	84		0.0679837
	0.555	0.655		44	10	0.0717191	4	86		0.068681
	0.559	0.659		46	12	0.0773776	6	88		0.0725376
	0.566	0.666		48	14	0.0864529	8	90		0.0811463
	0.569	0.669		50	16	0.101279	10	92		0.0966361
	0.558	0.658		52	18	0.121209	12	94		0.118661
	0.543	0.643		54	20	0.149283	14	96		0.147894
	0.535	0.635		56	22	0.183668	16	98		0.184436
	0.53	0.63		58	24	0.21893	18	100		0.220826
	0.518	0.618		60	26	0.252537	20	102		0.254246
	0.501	0.601		62	28	0.285753	22	104		0.286126
	0.487	0.587		64	30	0.318693	24	106		0.316942
	0.477	0.577		66	32	0.350962	26	108		0.347144
	0.467	0.567		68	34	0.38204	28	110		0.376456
	0.459	0.559		70	36	0.411027	30	112		0.403667
	0.444	0.544		72	38	0.437061	32	114		0.42809
	0.432	0.532		74	40	0.459969	34	116		0.450088
	0.426	0.526		76	42	0.480214	36	118		0.470348
	0.421	0.521		78	44	0.498364	38	120		0.489403
	0.413	0.513		80	46	0.515	40	122		0.507624
	0.395	0.495		82	48	0.530586	42	124		0.525418
	0.375	0.475		84	50	0.545331	44	126		0.542858
	0.358	0.458		86	52	0.559584	46	128		0.560093
	0.349	0.449		88	54	0.573354	48	130		0.57718
	0.338	0.438		90	56	0.586582	50	132		0.593877
	0.317	0.417		92	58	0.599203	52	134		0.61009
	0.294	0.394		94	60	0.611076	54	136		0.625605
	0.272	0.372		96	62	0.622263	56	138		0.640481
	0.253	0.353		98	64	0.632816	58	140		0.65489
	0.235	0.335		100	66	0.642897	60	142		0.668798
	0.216	0.316		102	68	0.652585	62	144		0.682376
	0.199	0.299		104	70	0.661991	64	146		0.69559
	0.186	0.286		106	72	0.671216	66	148		0.708299
	0.172	0.272		108	74	0.680288	68	150		0.72064
	0.156	0.256		110	76	0.689189	70	152		0.732081
	0.143	0.243		112	78	0.697789	72	154		0.742597
	0.128	0.228		114	80	0.706154	74	156		0.751893
	0.114	0.214		116	82	0.714103	76	158		0.759531
	0.1	0.2		118	84	0.721327	78	160		0.765361
	0.088	0.188		120	86	0.727497	80	162		0.769313
	0.076	0.176		122	88	0.732417	82	164		0.771183
	0.066	0.166		124	90	0.735706	84	166		0.771013
	0.055	0.155		126	92	0.737011	86	168		0.768926
	0.046	0.146		128	94	0.736094	88	170		0.765075
	0.036	0.136		130	96	0.7328	90	172		0.75966
	0.026	0.126		132	98	0.727069	92	174		0.752908
	0.017	0.117		134	100	0.718939	94	176		0.745026
	0.008	0.108		136	102	0.708502	96	178		0.736182
	-0.001	0.099		138	104	0.695887	98	180		0.726539
	-0.009	0.091		140	106	0.681547	100	182		0.716358
	-0.018	0.082		142	108	0.665379	102	184		0.705562
	-0.027	0.073		144	110	0.648249	104	186		0.694406
	-0.036	0.064		146	112	0.630161	106	188		0.682987
	-0.043	0.057		148	114	0.611399	108	190		0.671025
	-0.052	0.048		150	116	0.592288	110	192		0.659076
	-0.059	0.041		152	118	0.573085	112	194		0.64691
	-0.067	0.033		154	120	0.553931	114	196		0.634472
	-0.074	0.026		156	122	0.534872	116	198		0.621826
	-0.082	0.018		158	124	0.51609	118	200		0.609097
	-0.088	0.012		160	126	0.497618	120	202		0.596262
	-0.096	0.004		162	128	0.479508	122	204		0.583428
	-0.103	-0.003		164	130	0.461861	124	206		0.570445
	-0.109	-0.009		166	132	0.444581	126	208		0.557175
	-0.116	-0.016		168	134	0.427648	128	210		0.54361
	-0.123	-0.023		170	136	0.411053	130	212		0.529496
	-0.129	-0.029		172	138	0.394831	132	214		0.514702
	-0.135	-0.035		174	140	0.37902	134	216		0.499112
	-0.142	-0.042		176	142	0.36355	136	218		0.482482
	-0.148	-0.048		178	144	0.348353	138	220		0.464912
	-0.155	-0.055		180	146	0.333368	140	222		0.446312
	-0.161	-0.061		182	148	0.318531	142	224		0.426766
	-0.167	-0.067		184	150	0.303784	144	226		0.40647
	-0.173	-0.073		186	152	0.289069	146	228		0.385694
	-0.177	-0.077		188	154	0.274336	148	230		0.364801
	-0.176	-0.076		190	156	0.25955	150	232		0.344036
	-0.176	-0.076		192	158	0.244698	152	234		0.32361
	-0.177	-0.077		194	160	0.229796	154	236		0.303705
	-0.177	-0.077		196	162	0.214888	156	238		0.284444
	-0.177	-0.077		198	164	0.200022	158	240		0.265886
	-0.176	-0.076		200	166	0.185483	160	242		0.248051
	-0.176	-0.076		202	168	0.171153	162	244		0.230922
	-0.177	-0.077		204	170	0.15715	164	246		0.214457
	-0.177	-0.077		206	172	0.143208	166	248		0.198582
	-0.178	-0.078		208	174	0.128571	168	250		0.183433
	-0.181	-0.081		210	176	0.115313	170	252		0.168475
	-0.179	-0.079		212	178	0.104335	172	254		0.153689
	-0.18	-0.08		214	180	0.0941461	174	256		0.138372
	-0.179	-0.079		216	182	0.0844786	176	258		0.124026
	-0.179	-0.079		218	184	0.0771934	178	260		0.111425
	-0.178	-0.078		220	186	0.0741791	180	262		0.101134
	-0.178	-0.078		222	188	0.0714128	182	264		0.09122
	-0.178	-0.078		224	190	0.0700679	184	266		0.0823545
	-0.179	-0.079		226	192	0.0700679	186	268		0.0761054
	-0.178	-0.078		228	194	0.0700679	188	270		0.0724532
	-0.179	-0.079		230	196	0.0700679	190	272		0.0701742
	-0.18	-0.08		232	198	0.0700679	192	274		0.0687564
	-0.18	-0.08		234	200	0.0700679	194	276		0.0683993
	-0.179	-0.079		236	202	0.0700679	196	278		0.0683993
	-0.18	-0.08		238	204	0.0700679	198	280		0.0683993
	-0.18	-0.08		240	206	0.0700679	200	282		0.0683993
	-0.18	-0.08		242	208	0.0700679	202	284		0.0683993
	-0.18	-0.08		244	210	0.0700679	204	286		0.0683993
	-0.18	-0.08		246	212	0.0700679	206	288		0.0683993
	-0.18	-0.08		248	214	0.0700679	208	290		0.0683993
	-0.18	-0.08		250	216	0.0700679	210	292		0.0683993
	-0.181	-0.081		252	218	0.0700679	212	294		0.0683993
	-0.18	-0.08		254	220	0.0700679	214	296		0.0683993
	-0.18	-0.08		256	222	0.0700679	216	298		0.0683993
	-0.179	-0.079		258	224	0.0700679	218	300		0.0683993
	-0.18	-0.08		260	226	0.0700679	220	302		0.0683993
	-0.18	-0.08		262	228	0.0700679	222	304		0.0683993
	-0.18	-0.08		264	230	0.0700679	224	306		0.0683993
	-0.18	-0.08		266	232	0.0700679	226	308		0.0683993
	-0.18	-0.08		268	234	0.0700679	228	310		0.0683993
	-0.18	-0.08		270	236	0.0700679	230	312		0.0683993
	-0.18	-0.08		272	238	0.0700679	232	314		0.0683993
	-0.18	-0.08		274	240	0.0700679	234	316		0.0683993
depth	-0.18	-0.08		276	242	0.0700679	236	318		0.0683993
	-0.179	-0.079		278	244	0.0700679	238	320		0.0683993
	-0.18	-0.08		280	246	0.0700679	240	322		0.0683993
	-0.18	-0.08		282	248	0.0700679	242	324		0.0683993
	-0.18	-0.08		284	250	0.0700679	244	326		0.0683993
	-0.181	-0.081		286	252	0.0700679	246	328		0.0683993
	-0.182	-0.082		288	254	0.0700679	248	330		0.0683993
	-0.181	-0.081		290	256	0.0700679	250	332		0.0683993
	-0.181	-0.081		292	258	0.0700679	252	334		0.0683993
	-0.181	-0.081		294	260	0.0700679	254	336		0.0683993
	-0.181	-0.081		296	262	0.0700679	256	338		0.0683993
	-0.181	-0.081		298	264	0.0700679	258	340		0.0683993
	-0.181	-0.081		300	266	0.0700679	260	342		0.0683993
	-0.18	-0.08		302	268	0.0700679	262	344		0.0683993
	-0.181	-0.081		304	270	0.0700679	264	346		0.0683993
	-0.181	-0.081		306	272	0.0700679	266	348		0.0683993
	-0.181	-0.081		308	274	0.0700679	268	350		0.0683993
	-0.18	-0.08		310	276	0.0700679	270	352		0.0683993
	-0.18	-0.08		312	278	0.0700679	272	354		0.0683993
	-0.18	-0.08		314	280	0.0700679	274	356		0.0683993
	-0.18	-0.08		316	282	0.0700679	276	358		0.0683993
	-0.18	-0.08		318	284	0.0700679	278	360		0.0683993
	-0.18	-0.08		320	286	0.0700679	280	362		0.0683993
	-0.18	-0.08		322	288	0.0700679	282	364		0.0683993
	-0.18	-0.08		324	290	0.0700679	284	366		0.0683993
	-0.181	-0.081		326	292	0.0700679	286	368		0.0683993
	-0.18	-0.08		328	294	0.0700679	288	370		0.0683993
	-0.181	-0.081		330	296	0.0700679	290	372		0.0683993
	-0.181	-0.081		332	298	0.0700679	292	374		0.0683993
	-0.181	-0.081		334	300	0.0700679	294	376		0.0683993
	-0.182	-0.082		336	302	0.0700679	296	378		0.0683993
	-0.182	-0.082		338	304	0.0700679	298	380		0.0683993
	-0.182	-0.082		340	306	0.0700679	300	382		0.0683993
	-0.181	-0.081		342	308	0.0700679	302	384		0.0683993
	-0.181	-0.081		344	310	0.0700679	304	386		0.0683993
	-0.183	-0.083		346	312	0.0700679	306	388		0.0683993
	-0.183	-0.083		348	314	0.0700679	308	390		0.0683993
	-0.183	-0.083		350	316	0.0700679	310	392		0.0683993
	-0.183	-0.083		352	318	0.0700679	312	394		0.0683993
	-0.183	-0.083		354	320	0.0700679	314	396		0.0683993
	-0.182	-0.082		356	322	0.0700679	316	398		0.0683993
	-0.183	-0.083		358	324	0.0700679	318	400		0.0683993
	-0.184	-0.084		360				402
	-0.185	-0.085		362				404
	-0.183	-0.083		364				406
	-0.185	-0.085		366				408
	-0.185	-0.085		368				410
	-0.185	-0.085		370				412
	-0.183	-0.083		372				414
	-0.182	-0.082		374				416
	-0.183	-0.083		376				418
	-0.183	-0.083		378				420
	-0.184	-0.084		380				422
	-0.184	-0.084		382				424
	-0.183	-0.083		384				426
	-0.184	-0.084		386				428
	-0.186	-0.086		388				430
	-0.187	-0.087		390				432
	-0.187	-0.087		392				434
	-0.188	-0.088		394				436
	-0.189	-0.089		396				438
	-0.189	-0.089		398				440
	-0.19	-0.09		400				442
	-0.191	-0.091		402				444
	-0.192	-0.092		404				446
	-0.191	-0.091		406				448
	-0.191	-0.091		408				450
	-0.192	-0.092		410				452
	-0.191	-0.091		412				454
	-0.192	-0.092		414				456
	-0.19	-0.09		416				458
	-0.192	-0.092		418				460
	-0.192	-0.092		420				462
	-0.19	-0.09		422				464
	-0.191	-0.091		424				466
	-0.19	-0.09		426				468
	-0.189	-0.089		428				470
	-0.189	-0.089		430				472
	-0.19	-0.09		432				474
	-0.19	-0.09		434				476
	-0.19	-0.09		436				478
	-0.19	-0.09		438				480
	-0.19	-0.09		440				482
	-0.189	-0.089		442				484
	-0.188	-0.088		444				486
	-0.188	-0.088		446				488
	-0.188	-0.088		448				490
	-0.188	-0.088		450				492
	-0.188	-0.088		452				494
	-0.188	-0.088		454				496
	-0.189	-0.089		456				498
	-0.189	-0.089		458				500
	-0.189	-0.089		460				502
	-0.189	-0.089		462				504
	-0.189	-0.089		464				506
	-0.189	-0.089		466				508
	-0.189	-0.089		468				510
	-0.19	-0.09		470				512
	-0.19	-0.09		472				514
	-0.19	-0.09		474				516
	-0.189	-0.089		476				518
	-0.188	-0.088		478				520
	-0.189	-0.089		480				522
	-0.189	-0.089		482				524
	-0.189	-0.089		484				526
	-0.189	-0.089		486				528
	-0.189	-0.089		488				530
	-0.188	-0.088		490				532
	-0.188	-0.088		492				534
	-0.188	-0.088		494				536
	-0.189	-0.089		496				538
	-0.188	-0.088		498				540
	-0.19	-0.09		500				542
	-0.19	-0.09						544
	-0.189	-0.089						546
	-0.188	-0.088						548
	-0.188	-0.088						550
	-0.188	-0.088						552
	-0.187	-0.087						554
	-0.188	-0.088						556
	-0.187	-0.087						558
	-0.188	-0.088						560
	-0.187	-0.087						562
	-0.187	-0.087						564
	-0.187	-0.087						566
	-0.188	-0.088						568
	-0.187	-0.087						570
	-0.187	-0.087						572
	-0.188	-0.088						574
	-0.187	-0.087						576
	-0.188	-0.088						578
	-0.188	-0.088						580
	-0.188	-0.088						582
	-0.188	-0.088						584
	-0.188	-0.088						586
	-0.188	-0.088						588
	-0.187	-0.087						590
	-0.187	-0.087						592
	-0.187	-0.087						594
	-0.187	-0.087						596
	-0.186	-0.086						598
	-0.186	-0.086						600
	-0.185	-0.085						602
	-0.187	-0.087						604
	-0.187	-0.087						606
	-0.187	-0.087						608
	-0.187	-0.087						610
	-0.187	-0.087						612
	-0.186	-0.086						614
	-0.185	-0.085						616
	-0.184	-0.084						618
	-0.185	-0.085						620
	-0.185	-0.085						622
	-0.185	-0.085						624
	-0.185	-0.085						626
	-0.186	-0.086						628
	-0.186	-0.086						630
	-0.186	-0.086						632
	-0.187	-0.087						634
	-0.187	-0.087						636
	-0.187	-0.087						638
	-0.186	-0.086						640
	-0.185	-0.085						642
	-0.186	-0.086						644
	-0.185	-0.085						646
	-0.185	-0.085						648
	-0.185	-0.085						650
	-0.184	-0.084						652
	-0.184	-0.084						654
	-0.182	-0.082						656
	-0.182	-0.082						658
	-0.181	-0.081						660
	-0.181	-0.081						662
	-0.182	-0.082						664
	-0.181	-0.081						666
	-0.18	-0.08						668
	-0.181	-0.081						670
	-0.181	-0.081						672
	-0.181	-0.081						674
	-0.18	-0.08						676
	-0.18	-0.08						678
	-0.18	-0.08						680
	-0.179	-0.079						682
	-0.18	-0.08						684
	-0.18	-0.08						686
	-0.18	-0.08						688
	-0.181	-0.081						690
	-0.18	-0.08						692
	-0.18	-0.08						694
	-0.179	-0.079						696
	-0.179	-0.079						698
	-0.179	-0.079						700
	-0.18	-0.08						702
	-0.18	-0.08						704
	-0.18	-0.08						706
	-0.18	-0.08						708
	-0.18	-0.08						710
	-0.18	-0.08						712
	-0.181	-0.081						714
	-0.181	-0.081						716
	-0.18	-0.08						718
	-0.18	-0.08						720
	-0.18	-0.08						722
	-0.181	-0.081						724
	-0.179	-0.079						726
	-0.179	-0.079						728
	-0.179	-0.079						730
	-0.179	-0.079						732
	-0.178	-0.078						734
	-0.179	-0.079						736
	-0.178	-0.078						738
	-0.179	-0.079						740
	-0.178	-0.078						742
	-0.177	-0.077						744
	-0.177	-0.077						746
	-0.177	-0.077						748
	-0.178	-0.078						750
	-0.176	-0.076						752
	-0.176	-0.076						754
	-0.176	-0.076						756
	-0.176	-0.076						758
	-0.176	-0.076						760
	-0.177	-0.077						762
	-0.177	-0.077						764
	-0.178	-0.078						766
	-0.177	-0.077						768
	-0.176	-0.076						770
	-0.176	-0.076						772
	-0.175	-0.075						774
	-0.176	-0.076						776
	-0.176	-0.076						778
	-0.176	-0.076						780
	-0.177	-0.077						782
	-0.176	-0.076						784
	-0.176	-0.076						786
	-0.176	-0.076						788
	-0.177	-0.077						790
	-0.176	-0.076						792
	-0.176	-0.076						794
	-0.176	-0.076						796
	-0.176	-0.076						798
	-0.175	-0.075						800
	-0.174	-0.074
	-0.174	-0.074
	-0.174	-0.074
	-0.174	-0.074
	-0.174	-0.074
	-0.175	-0.075
	-0.175	-0.075
	-0.175	-0.075
	-0.174	-0.074
	-0.175	-0.075
	-0.175	-0.075
	-0.176	-0.076
	-0.176	-0.076
	-0.176	-0.076
	-0.175	-0.075
	-0.175	-0.075
	-0.175	-0.075
	-0.175	-0.075
	-0.174	-0.074
	-0.174	-0.074
	-0.172	-0.072
	-0.173	-0.073
	-0.173	-0.073
	-0.173	-0.073
	-0.173	-0.073
	-0.173	-0.073
	-0.173	-0.073
	-0.174	-0.074
	-0.174	-0.074
	-0.174	-0.074
	-0.174	-0.074
	-0.172	-0.072
	-0.173	-0.073
	-0.173	-0.073
	-0.172	-0.072
	-0.173	-0.073
	-0.177	-0.077
	-0.177	-0.077
	-0.178	-0.078
	-0.177	-0.077
	-0.176	-0.076
	-0.178	-0.078
	-0.178	-0.078
	-0.176	-0.076
	-0.175	-0.075
	-0.176	-0.076
	-0.175	-0.075
	-0.176	-0.076
	-0.176	-0.076
	-0.176	-0.076
	-0.175	-0.075
	-0.174	-0.074
	-0.175	-0.075
	-0.174	-0.074
	-0.174	-0.074
	-0.173	-0.073
	-0.173	-0.073
	-0.174	-0.074
	-0.174	-0.074
	-0.176	-0.076
	-0.176	-0.076
	-0.175	-0.075
	-0.174	-0.074
	-0.174	-0.074
										0.06859
										0.06859
										0.06859
										0.06859
										0.06859
										0.06859
										0.06859
										0.06859
										0.06859
										0.06859
										0.06859
										0.06859
										0.06859
										0.06859
										0.06859
										0.06859
										0.06859
										0.06859
										0.06859
										0.06859
										0.06859
										0.06859
										0.06859
										0.06859
										0.06859
										0.06859
										0.06859
										0.06859
										0.06859
										0.06859
										0.06859
										0.06859
										0.06859
										0.06859
										0.06859
										0.06859
										0.06859
										0.06859
										0.06859
										0.06859
										0.06859
										0.06859
										0.06859
										0.06859
										0.06859
										0.06859
										0.06859
										0.06859
										0.06859
										0.06859
										0.06859
										0.06859
										0.06859
										0.06859
										0.06859
										0.06859
										0.06859
										0.06859
										0.06859
										0.06859
										0.06859
										0.06859
										0.06859
										0.06859
										0.06859
										0.06859
										0.06859
										0.06859
										0.06859
										0.06859
										0.06859
										0.06859
										0.06859
										0.06859
										0.06859
										0.06859
										0.06859
										0.06859
										0.06859
										0.06859
										0.06859
										0.06859
										0.06859
										0.06859
										0.06859
										0.06859
										0.06859
										0.06859
										0.06859
										0.06859
										0.06859
										0.06859
										0.06859
										0.06859
										0.06859
										0.06859
										0.06859
										0.06859
										0.06859
										0.06859
										0.06859
										0.06859
										0.06859
										0.06859
										0.06859
										0.06859
										0.06859
										0.06859
										0.06859
										0.06859
										0.06859
										0.06859
										0.06859
										0.06859
										0.06859
										0.06859
										0.06859
										0.06859
										0.06859
										0.06859
										0.06859
										0.06859
										0.06859
										0.06859
										0.06859
										0.06859
										0.06859
										0.06859
										0.06859
										0.06859
										0.06859
										0.06859
										0.06859
										0.06859
										0.06859
										0.06859
										0.06859
										0.06859
										0.06859
										0.06859
										0.06859
										0.06859
										0.06859
										0.06859
										0.06859
										0.06859
										0.06859
										0.06859
										0.06859
										0.06859
										0.06859
										0.06859
										0.06859
										0.06859
										0.06859
										0.06859
										0.06859
										0.06859
										0.06859
										0.06859
										0.06859
										0.06859
										0.06859
										0.06859
										0.06859
										0.06859
										0.06859
										0.06859
										0.06859
										0.06859
										0.06859
										0.06859
										0.06859
										0.06859
										0.06859
										0.06859
										0.06859
										0.06859
										0.06859
										0.06859
										0.06859
										0.06859
										0.06859
										0.06859
										0.06859
										0.06859
										0.06859
										0.06859
										0.06859
										0.06859
										0.06859
										0.06859
										0.06859
										0.06859
										0.06859
										0.06859
										0.06859
										0.06859
										0.06859
										0.06859
										0.06859
										0.06859
										0.06859
										0.06859
										0.06859
										0.06859
										0.06859
										0.06859
										0.06859
										0.06859
										0.06859
										0.06859
										0.06859
										0.06859
										0.06859
										0.06859
										0.06859
										0.06859
										0.06859
										0.06859
										0.06859
										0.06859
										0.06859
										0.06859
										0.06859
										0.06859
										0.06859
										0.06859
										0.06859
										0.06859
										0.06859
										0.06859
										0.06859
										0.06859
										0.06859
										0.06859
										0.06859
										0.06859
										0.06859
										0.06859
										0.06859
										0.06859
										0.06859
										0.06859
										0.06859
										0.06859
										0.06859
										0.06859
										0.06859
										0.06859
										0.06859
										0.06859
										0.06859
										0.06859
										0.06859
										0.06859
										0.06859
										0.06859
										0.06859
										0.06859
										0.06859
										0.06859
										0.06859
										0.06859
										0.06859
										0.06859
										0.06859
										0.06859
										0.06859
										0.06859
										0.06859
										0.06859
										0.06859
										0.06859
										0.06859
										0.06859
										0.06859
										0.06859
										0.06859
										0.06859
										0.06859
										0.06859
										0.06859
										0.06859
										0.06859
										0.06859
										0.06859
										0.06859
										0.06859
										0.06859
										0.06859
										0.06859
										0.06859
										0.06859
										0.06859
										0.06859
										0.06859
										0.06859
										0.06859
										0.06859
										0.06859
										0.06859
										0.06859
										0.06859
										0.06859
										0.06859
										0.06859
										0.06859
										0.06859
										0.06859
										0.06859
										0.06859
										0.06859
										0.06859
										0.06859
										0.06859
										0.06859
										0.06859
										0.06859
										0.06859
										0.06859
										0.06859
										0.06859
										0.06859
										0.06859
										0.06859
										0.06859
										0.06859
										0.06859
										0.06859
										0.06859
										0.06859
										0.06859
										0.06859
										0.06859
										0.06859
										0.06859
										0.06859
										0.06859
										0.06859
										0.06859
										0.06859
										0.06859
										0.06859
										0.06859
										0.06859
										0.06859
										0.06859
										0.06859
										0.06859
										0.06859
										0.06859
										0.06859
										0.06859
										0.06859
										0.06859
										0.06859
										0.06859
										0.06859
										0.06859
										0.06859
										0.06859
										0.06859
										0.06859
										0.06859
										0.06859
										0.06859
										0.06859
										0.06859
										0.06859
										0.06859
										0.06859
										0.06859
										0.06859
										0.06859
										0.06859
										0.06859
										0.06859
										0.06859
										0.06859
										0.06859
										0.06859
										0.06859
										0.06859
										0.06859
										0.06859
										0.06859
										0.06859
										0.06859
										0.06859
										0.06859
										0.06859
										0.06859
										0.06859
										0.06859
										0.06859
										0.06859
										0.06859
										0.06859
										0.06859
										0.06859
										0.06859
										0.06859
										0.06859
										0.06859
										0.06859
										0.06859
										0.06859
										0.06859
										0.06859
										0.06859
										0.06859
										0.06859
										0.06859
										0.06859
										0.06859
										0.06859
										0.06859
										0.06859
										0.06859
										0.06859
										0.06859
										0.06859
										0.06859
										0.06859
										0.06859
										0.06859
										0.06859
										0.06859
										0.06859
										0.06859
										0.06859
										0.06859
										0.06859
										0.06859
										0.06859
										0.06859
										0.06859
										0.06859
										0.06859
										0.06859
										0.06859
										0.06859
										0.06859
										0.06859
										0.06859
										0.06859
										0.06859
										0.06859
										0.06859
										0.06859
										0.06859
										0.06859
										0.06859
										0.06859
										0.06859
										0.06859
										0.06859
										0.06859
										0.06859
										0.06859
										0.06859
										0.06859
										0.06859
										0.06859
										0.06859
										0.06859
										0.06859
										0.06859
										0.06859
										0.06859
										0.06859
										0.06859
										0.06859
										0.06859
										0.06859
										0.06859
										0.06859
										0.06859
										0.06859
										0.06859
										0.06859
										0.06859
										0.06859
										0.06859
										0.06859
										0.06859
										0.06859
										0.06859
										0.06859
										0.06859
										0.06859
										0.06859
										0.06859
										0.06859
										0.06859
										0.06859
										0.06859
										0.06859
										0.06859
										0.06859
										0.06859
										0.06859
										0.06859
										0.06859
										0.06859
										0.06859
										0.06859
										0.06859
										0.06859
										0.06859
										0.06859
										0.06859
										0.06859
										0.06859
										0.06859
										0.06859
										0.06859
										0.06859
										0.06859
										0.06859
										0.06859
										0.06859
										0.06859
										0.06859
										0.06859
										0.0691169
										0.0722353
										0.0795701
										0.0924741
										0.112042
										0.136463
										0.16862
										0.203225
										0.236273
										0.267552
										0.298634
										0.329636
										0.360583
										0.390319
										0.417567
										0.442015
										0.464061
										0.484141
										0.502536
										0.519624
										0.535668
										0.550786
										0.565309
										0.579044
										0.592043
										0.604174
										0.615455
										0.626043
										0.636081
										0.645692
										0.654943
										0.663954
										0.672858
										0.681625
										0.690319
										0.698819
										0.707218
										0.715431
										0.723253
										0.730449
										0.736934
										0.742306
										0.746221
										0.748371
										0.748481
										0.746335
										0.7418
										0.734826
										0.725482
										0.713921
										0.700231
										0.684927
										0.668027
										0.650218
										0.631681
										0.612635
										0.593318
										0.573991
										0.554812
										0.535809
										0.517203
										0.499031
										0.481307
										0.464087
										0.447214
										0.430644
										0.414392
										0.398491
										0.383012
										0.367877
										0.352999
										0.33832
										0.32378
										0.309313
										0.294845
										0.2803
										0.265617
										0.25077
										0.235773
										0.220673
										0.205484
										0.19038
										0.175654
										0.160254
										0.145074
										0.1293
										0.115245
										0.103932
										0.0935097
										0.0838684
										0.0768021
										0.0729275
										0.0705102
										0.0690222
										0.068732
										0.068732
										0.068732
										0.068732
										0.068732
										0.068732
										0.068732
										0.068732
										0.068732
										0.068732
										0.068732
										0.068732
										0.068732
										0.068732
										0.068732
										0.068732
										0.068732
										0.068732
										0.068732
										0.068732
										0.068732
										0.068732
										0.068732
										0.068732
										0.068732
										0.068732
										0.068732
										0.068732
										0.068732
										0.068732
										0.068732
										0.068732
										0.068732
										0.068732
										0.068732
										0.068732
										0.068732
										0.068732
										0.068732
										0.068732
										0.068732
										0.068732
										0.068732
										0.068732
										0.068732
										0.068732
										0.068732
										0.068732
										0.068732
										0.068732
										0.068732
										0.068732
