# Supplementary material for: Numerical study of hydrodynamic and salinity transport processes in the Pink Beach wetlands of the Liao River estuary, China
Source: Copernicus journal article supplement (doi:10.5194/os-14-437-2018), 2018-06-11
Supplement: Supplementary file 27 [file Simulated salinity under different runoff conditions of G1 and G2.xls]

## Sheet: Salinity with different runoff
G1	06/28/2017	0.01	Measured	0	0；0	0	30；0	0	450；228	0	285114	0	101	0	600	0	G2	285	0	450	0	101	0	0	0	30	0	600	0
	06/28/2017	0.01		2		0		0		0		0	57	0		0		114	0	228	0	57	0		0		0		0
	06/28/2017	0.01		4		0		0		0		0		0		0			0		0		0		0		0		0
	06/28/2017	0.01		6		0		0		0		0		0		0			0		0		0		0		0		0
	06/28/2017	0.01		8		0		0		0		0		0		0			8.10734		5.66034		16.7843		32.7883		26.6159		4.57443
	06/28/2017	0		10		0		0		0		0		0		0			8.09974		5.65156		16.7799		32.7883		26.6159		4.56733
	06/28/2017	0		12		0		0		0		0		0		0			8.08837		5.64268		16.7693		32.7883		26.61		4.55971
	06/28/2017	0		14		0		0		0		0		0		0			8.07691		5.63215		16.754		32.7883		26.6004		4.54949
	06/28/2017	0		16		0		0		0		0		0		0			8.06318		5.61514		16.7374		32.7883		26.5875		4.53451
	06/28/2017	0		18		0		0		0		0		0		0			8.04013		5.59605		16.7174		32.7883		26.5727		4.51929
	06/28/2017	0		20		0		0		0		0		0		0			8.01683		5.577		16.6873		32.7882		26.553		4.50468
	06/28/2017	0		22		0		0		0		0		0		0			7.9944		5.5599		16.6575		32.7882		26.5294		4.49257
	06/28/2017	0		24		0		0		0		0		0		0			7.97534		5.54663		16.6289		32.7882		26.506		4.48373
	06/28/2017	0		26		0		0		0		0		0		0			7.96149		5.5378		16.6046		32.7882		26.4838		4.47847
	06/28/2017	0		28		0		0		0		0		0		0			7.95348		5.53356		16.5862		32.7882		26.4651		4.47658
	06/28/2017	0		30		0		0		0		0		0		0			7.95119		5.53337		16.5743		32.7882		26.4501		4.47748
	06/28/2017	0		32		0		0		0		0		0		0			7.95378		5.53644		16.5689		32.7882		26.4392		4.48057
	06/28/2017	0		34		0		0		0		0		0		0			7.96017		5.54199		16.569		32.7882		26.4325		4.48532
	06/28/2017	0		36		0		0		0		0		0		0			7.9694		5.54943		16.5736		32.7882		26.4292		4.4914
	06/28/2017	0		38		0		0		0		0		0		0			7.98074		5.55838		16.5814		32.7882		26.4288		4.4986
	06/28/2017	0		40		0		0		0		0		0		0			7.99377		5.56862		16.5917		32.7882		26.4305		4.5068
	06/28/2017	0		42		0		0		0		0		0		0			8.00823		5.57999		16.6039		32.7882		26.4339		4.5159
	06/28/2017	0		44		0		0		0		0		0		0			8.02392		5.59237		16.6177		32.7882		26.4386		4.52581
	06/28/2017	0		46		0		0		0		0		0		0			8.0407		5.60567		16.6328		32.7882		26.4444		4.53654
	06/28/2017	0		48		0		0		0		0		0		0			8.05848		5.61991		16.649		32.7882		26.451		4.54807
	06/28/2017	0		50		0		0		0		0		0		0			8.0773		5.63502		16.6663		32.7882		26.4584		4.56029
	06/28/2017	0		52		0		0		0		0		0		0			8.09708		5.65088		16.6845		32.7882		26.4664		4.57315
	06/28/2017	0		54		0		0		0		0		0		0			8.11762		5.6674		16.7038		32.7882		26.4751		4.5865
	06/28/2017	0		56		0		0		0		0		0		0			8.13877		5.68434		16.7238		32.7882		26.4844		4.60011
	06/28/2017	0		58		0		0		0		0		0		0			8.16028		5.70142		16.7443		32.7882		26.4942		4.61384
	06/28/2017	0		60		0		0		0		0		0		0			8.18179		5.71852		16.7652		32.7883		26.5042		4.62756
	06/28/2017	0		62		0		0		0		0		0		0			8.20313		5.7355		16.7861		32.7883		26.5145		4.64114
	06/28/2017	0		64		0		0		0		0		0		0			8.22421		5.75224		16.8068		32.7883		26.5247		4.65459
	06/28/2017	0		66		0		0		0		0		0		0			8.24495		5.76874		16.8272		32.7883		26.535		4.66788
	06/28/2017	0		68		0		0		0		0		0		0			8.26533		5.78498		16.8473		32.7883		26.5451		4.68098
	06/28/2017	0		70		0		0		0		0		0		0			8.2853		5.80093		16.867		32.7883		26.5551		4.69383
	06/28/2017	0		72		0		0		0		0		0		0			8.30484		5.81654		16.8864		32.7883		26.5649		4.7064
	06/28/2017	0		74		0		0		0		0		0		0			8.32392		5.83176		16.9054		32.7883		26.5746		4.71865
	06/28/2017	0		76		0		0		0		0		0		0			8.3425		5.84656		16.9239		32.7883		26.5841		4.73055
	06/28/2017	0		78		0		0		0		0		0		0			8.36051		5.86086		16.942		32.7883		26.5934		4.74203
	06/28/2017	0		80		0		0		0		0		0		0			8.37786		5.87459		16.9595		32.7883		26.6024		4.75299
	06/28/2017	0		82		0		0		0		0		0		0			8.39443		5.88762		16.9765		32.7883		26.6112		4.76336
	06/28/2017	0		84		0		0		0		0		0		0			8.41011		5.89986		16.9927		32.7883		26.6197		4.77304
	06/28/2017	0		86		0		0		0		0		0		0			8.42475		5.91117		17.008		32.7883		26.6278		4.78192
	06/28/2017	0		88		0		0		0		0		0		0			8.43821		5.92144		17.0224		32.7883		26.6355		4.7899
	06/28/2017	0		90		0		0		0		0		0		0			8.4503		5.93053		17.0357		32.7883		26.6427		4.79688
	06/28/2017	0		92		0		0		0		0		0		0			8.46084		5.93827		17.0478		32.7883		26.6494		4.80274
	06/28/2017	0		94		0		0		0		0		0		0			8.46962		5.94452		17.0583		32.7883		26.6554		4.80737
	06/28/2017	0		96		0		0		0		0		0		0			8.47656		5.94929		17.0672		32.7884		26.6606		4.81081
	06/28/2017	0		98		0		0		0		0		0		0			8.48171		5.95254		17.0745		32.7884		26.6652		4.81301
	06/28/2017	0		100		0		0		0		0		0		0			8.48493		5.95419		17.0802		32.7884		26.669		4.81393
	06/28/2017	0		102		0		0		0		0		0		0			8.48621		5.95445		17.0842		32.7884		26.6719		4.81379
	06/28/2017	0		104		0		0		0		0		0		0			8.48592		5.95346		17.0862		32.7884		26.674		4.81263
	06/28/2017	0		106		0		0		0		0		0		0			8.48411		5.95125		17.0866		32.7884		26.6752		4.8105
	06/28/2017	0		108		0		0		0		0		0		0			8.48072		5.94777		17.0855		32.7884		26.6756		4.80729
	06/28/2017	0		110		0		0		0		0		0		0			8.47564		5.94289		17.083		32.7884		26.6752		4.80302
	06/28/2017	0		112		0		0		0		0		0		0			8.46879		5.93667		17.0787		32.7884		26.674		4.79775
	06/28/2017	0		114		0		0		0		0		0		0			8.46023		5.92927		17.0727		32.7884		26.672		4.79162
	06/28/2017	0		116		0		0		0		0		0		0			8.45018		5.92086		17.065		32.7884		26.6692		4.78479
	06/28/2017	0		118		0		0		0		0		0		0			8.43897		5.91165		17.0559		32.7884		26.6656		4.77739
	06/28/2017	0		120		0		0		0		0		0		0			8.42703		5.90197		17.0457		32.7884		26.6614		4.76963
	06/28/2017	0		122		0		0		0		0		0		0			8.41461		5.89202		17.0347		32.7884		26.6566		4.76171
	06/28/2017	0		124		0		0		0		0		0		0			8.40179		5.88187		17.023		32.7883		26.6514		4.75368
	06/28/2017	0		126		0		0		0		0		0		0			8.38863		5.87152		17.0108		32.7883		26.6459		4.74551
	06/28/2017	0		128		0		0		0		0		0		0			8.37529		5.86102		16.9983		32.7883		26.6402		4.73723
	06/28/2017	0		130		0		0		0		0		0		0			8.36184		5.85046		16.9856		32.7883		26.6343		4.72887
	06/28/2017	0		132		0		0		0		0		0		0			8.34828		5.83984		16.9725		32.7883		26.6281		4.72048
	06/28/2017	30.56		134		32.7803		20.0544		2.03257		2.31965		7.35301		2.00565			8.33459		5.82914		16.9593		32.7883		26.6218		4.71202
	06/28/2017	30.63		136		32.7802		20.0463		2.03224		2.31784		7.34392		2.00557			8.32077		5.81834		16.9458		32.7883		26.6153		4.70349
	06/28/2017	31.02		138		32.7802		20.0385		2.03192		2.31609		7.33512		2.0055			8.30678		5.80742		16.932		32.7883		26.6086		4.69483
	06/28/2017	30.76		140		32.7802		20.0309		2.03162		2.3144		7.3266		2.00543			8.29257		5.79633		16.9179		32.7883		26.6017		4.68603
	06/28/2017	30.4		142		32.7802		20.0237		2.03132		2.31277		7.31835		2.00536			8.2781		5.78506		16.9035		32.7883		26.5945		4.6771
	06/28/2017	30.16		144		32.7802		20.0167		2.03103		2.31119		7.31037		2.00529			8.26336		5.7736		16.8886		32.7883		26.587		4.66803
	06/28/2017	29.99		146		32.7802		20.0098		2.03076		2.30966		7.30266		2.00522			8.24831		5.76195		16.8732		32.7883		26.5792		4.65881
	06/28/2017	29.87		148		32.7802		20.0033		2.03049		2.30818		7.29513		2.00516			8.23292		5.75008		16.8573		32.7883		26.5712		4.64944
	06/28/2017	29.8		150		32.7802		19.9975		2.03023		2.30673		7.2878		2.0051			8.21708		5.73794		16.8414		32.7883		26.5631		4.63988
	06/28/2017	29.75		152		32.7802		19.9924		2.02998		2.30531		7.28133		2.00504			8.20148		5.72557		16.8252		32.7883		26.5559		4.63007
	06/28/2017	29.7		154		32.7802		19.9893		2.02973		2.30403		7.27533		2.00498			8.18558		5.71331		16.812		32.7883		26.5496		4.62025
	06/28/2017	29.67		156		32.7802		19.9863		2.02951		2.30283		7.27159		2.00493			8.1722		5.70094		16.7998		32.7883		26.545		4.61037
	06/28/2017	29.63		158		32.7802		19.9834		2.02931		2.30202		7.26814		2.00488			8.16029		5.69105		16.7918		32.7883		26.5412		4.601
	06/28/2017	29.59		160		32.7802		19.9807		2.02917		2.30131		7.26483		2.00484			8.15161		5.68181		16.7842		32.7883		26.5373		4.59337
	06/28/2017	29.55		162		32.7802		19.9781		2.02904		2.30062		7.26167		2.00481			8.14416		5.67553		16.7766		32.7883		26.5356		4.58643
	06/28/2017	29.51		164		32.7802		19.9758		2.02892		2.29997		7.25862		2.00478			8.13663		5.66972		16.7743		32.7883		26.535		4.58182
	06/28/2017	29.47		166		32.7802		19.9746		2.0288		2.29933		7.25576		2.00475			8.13342		5.66383		16.7733		32.7883		26.5349		4.57717
	06/28/2017	29.44		168		32.7802		19.9737		2.02868		2.29871		7.25427		2.00472			8.13207		5.66173		16.773		32.7883		26.5343		4.57318
	06/28/2017	29.39		170		32.7802		19.9731		2.02857		2.29833		7.25312		2.00469			8.13177		5.66082		16.7716		32.7883		26.534		4.57189
	06/28/2017	29.36		172		32.7802		19.9725		2.0285		2.29807		7.25226		2.00466			8.13052		5.66059		16.7713		32.7883		26.534		4.57148
	06/28/2017	29.32		174		32.7802		19.972		2.02845		2.29785		7.2515		2.00465			8.12989		5.65949		16.7713		32.7883		26.534		4.5711
	06/28/2017	29.28		176		32.7802		19.9715		2.02841		2.29767		7.25078		2.00464			8.12996		5.65922		16.7713		32.7883		26.534		4.57014
	06/28/2017	29.26		178		32.7802		19.9693		2.02837		2.29749		7.25012		2.00463			8.12996		5.65926		16.7713		32.7883		26.534		4.57021
	06/28/2017	29.17		180		32.7802		19.9688		2.02834		2.29733		7.24788		2.00462			8.12996		5.65926		16.7713		32.7883		26.534		4.57022
	06/28/2017	29.1		182		32.7802		19.9685		2.0283		2.29693		7.24738		2.00461			8.12996		5.65926		16.7713		32.7883		26.534		4.57022
	06/28/2017	29.06		184		32.7802		19.9681		2.02823		2.29681		7.24694		2.0046			8.12996		5.65926		16.7713		32.7883		26.534		4.57022
	06/28/2017	28.92		186		32.7802		19.9677		2.02821		2.29671		7.24653		2.00458			8.12996		5.65926		16.7713		32.7883		26.534		4.57022
	06/28/2017	28.83		188		32.7802		19.9675		2.02819		2.29662		7.24613		2.00458			8.12996		5.65926		16.7713		32.7883		26.534		4.57022
	06/28/2017	28.72		190		32.7802		19.9674		2.02817		2.29654		7.24578		2.00457			8.12996		5.65926		16.7713		32.7883		26.534		4.57022
	06/28/2017	28.64		192		32.7802		19.9673		2.02815		2.29645		7.24565		2.00457			8.12996		5.65926		16.7713		32.7883		26.534		4.57022
	06/28/2017	28.57		194		32.7802		19.9673		2.02814		2.29639		7.24559		2.00456			8.12996		5.65926		16.7713		32.7883		26.534		4.57022
	06/28/2017	28.52		196		32.7802		19.9673		2.02812		2.29637		7.24557		2.00456			8.12996		5.65926		16.7713		32.7883		26.534		4.57022
	06/28/2017	28.46		198		32.7802		19.9673		2.02812		2.29636		7.24556		2.00455			8.12996		5.65926		16.7713		32.7883		26.534		4.57022
	06/28/2017	28.42		200		32.7802		19.9674		2.02811		2.29635		7.24557		2.00455			8.12996		5.65926		16.7713		32.7883		26.534		4.57022
	06/28/2017	28.39		202		32.7802		19.9674		2.02811		2.29635		7.2456		2.00455			8.12996		5.65926		16.7713		32.7883		26.534		4.57022
	06/28/2017	28.34		204		32.7802		19.9674		2.02811		2.29635		7.24562		2.00455			8.12996		5.65926		16.7713		32.7883		26.534		4.57022
	06/28/2017	28.32		206		32.7802		19.9674		2.02811		2.29636		7.24562		2.00455			8.12996		5.65926		16.7713		32.7883		26.534		4.57022
	06/28/2017	28.29		208		32.7802		19.9674		2.02811		2.29636		7.24563		2.00455			8.12996		5.65926		16.7713		32.7883		26.534		4.57022
	06/28/2017	28.26		210		32.7802		19.9674		2.02811		2.29636		7.24563		2.00455			8.12996		5.65926		16.7713		32.7883		26.534		4.57022
	06/28/2017	28.23		212		32.7802		19.9674		2.02811		2.29636		7.24563		2.00455			8.12996		5.65926		16.7713		32.7883		26.534		4.57022
	06/28/2017	28.2		214		32.7802		19.9674		2.02811		2.29636		7.24563		2.00455			8.12996		5.65926		16.7713		32.7883		26.534		4.57022
	06/28/2017	28.2		216		32.7802		19.9674		2.02811		2.29636		7.24563		2.00455			8.12996		5.65926		16.7713		32.7883		26.534		4.57022
	06/28/2017	28.19		218		32.7802		19.9674		2.02811		2.29636		7.24564		2.00455			8.12996		5.65926		16.7713		32.7883		26.534		4.57022
	06/28/2017	28.18		220		32.7802		19.9674		2.02811		2.29636		7.24564		2.00455			8.12996		5.65926		16.7713		32.7883		26.534		4.57022
	06/28/2017	28.18		222		32.7802		19.9674		2.02811		2.29636		7.24564		2.00455			8.12996		5.65926		16.7713		32.7883		26.534		4.57022
	06/28/2017	28.19		224		32.7802		19.9674		2.02811		2.29636		7.24564		2.00455			8.12996		5.65926		16.7713		32.7883		26.534		4.57022
	06/28/2017	28.19		226		32.7802		19.9674		2.02811		2.29636		7.24564		2.00455			8.12996		5.65926		16.7713		32.7883		26.534		4.57022
	06/28/2017	28.18		228		32.7802		19.9674		2.02811		2.29636		7.24564		2.00455			8.12996		5.65926		16.7713		32.7883		26.534		4.57022
	06/28/2017	28.19		230		32.7802		19.9674		2.02811		2.29636		7.24564		2.00455			8.12996		5.65926		16.7713		32.7883		26.534		4.57022
	06/28/2017	28.18		232		32.7802		19.9674		2.02811		2.29636		7.24564		2.00455			8.12996		5.65926		16.7713		32.7883		26.534		4.57022
	06/28/2017	28.18		234		32.7802		19.9674		2.02811		2.29636		7.24564		2.00455			8.12996		5.65926		16.7713		32.7883		26.534		4.57022
	06/28/2017	28.17		236		32.7802		19.9674		2.02811		2.29636		7.24564		2.00455			8.12996		5.65926		16.7713		32.7883		26.534		4.57022
	06/28/2017	28.17		238		32.7802		19.9674		2.02811		2.29636		7.24564		2.00455			8.12996		5.65926		16.7713		32.7883		26.534		4.57022
	06/28/2017	28.17		240		32.7802		19.9674		2.02811		2.29636		7.24564		2.00455			8.12996		5.65926		16.7713		32.7883		26.534		4.57022
	06/28/2017	28.16		242		32.7802		19.9674		2.02811		2.29636		7.24564		2.00455			0		0		0		0		0		0
	06/28/2017	28.16		244		32.7802		19.9674		2.02811		2.29636		7.24564		2.00455			0		0		0		0		0		0
	06/28/2017	28.16		246		32.7802		19.9674		2.02811		2.29636		7.24564		2.00455			0		0		0		0		0		0
	06/28/2017	28.15		248		32.7802		19.9674		2.02811		2.29636		7.24564		2.00455			0		0		0		0		0		0
	06/28/2017	28.14		250		32.7802		19.9674		2.02811		2.29636		7.24564		2.00455			0		0		0		0		0		0
	06/28/2017	28.13		252		32.7802		19.9674		2.02811		2.29636		7.24564		2.00455			0		0		0		0		0		0
	06/28/2017	28.15		254		32.7802		19.9674		2.02811		2.29636		7.24564		2.00455			0		0		0		0		0		0
	06/28/2017	28.15		256		32.7802		19.9674		2.02811		2.29636		7.24564		2.00455			0		0		0		0		0		0
	06/28/2017	28.15		258		32.7802		19.9674		2.02811		2.29636		7.24564		2.00455			0		0		0		0		0		0
	06/28/2017	28.15		260		32.7802		19.9674		2.02811		2.29636		7.24564		2.00455			0		0		0		0		0		0
	06/28/2017	28.15		262		32.7802		19.9674		2.02811		2.29636		7.24564		2.00455			0		0		0		0		0		0
	06/28/2017	28.15		264		32.7802		19.9674		2.02811		2.29636		7.24564		2.00455			0		0		0		0		0		0
	06/28/2017	28.15		266		32.7802		19.9674		2.02811		2.29636		7.24564		2.00455			0		0		0		0		0		0
	06/28/2017	28.15		268		32.7802		19.9674		2.02811		2.29636		7.24564		2.00455			0		0		0		0		0		0
	06/28/2017	28.15		270		32.7802		19.9674		2.02811		2.29636		7.24564		2.00455			0		0		0		0		0		0
	06/28/2017	28.16		272		32.7802		19.9674		2.02811		2.29636		7.24564		2.00455			0		0		0		0		0		0
	06/28/2017	28.16		274		32.7802		19.9674		2.02811		2.29636		7.24564		2.00455			0		0		0		0		0		0
	06/28/2017	28.17		276		32.7802		19.9674		2.02811		2.29636		7.24564		2.00455			0		0		0		0		0		0
	06/28/2017	28.17		278		32.7802		19.9674		2.02811		2.29636		7.24564		2.00455			0		0		0		0		0		0
	06/28/2017	28.17		280		32.7802		19.9674		2.02811		2.29636		7.24564		2.00455			0		0		0		0		0		0
	06/28/2017	28.17		282		32.7802		19.9674		2.02811		2.29636		7.24564		2.00455			0		0		0		0		0		0
	06/28/2017	28.19		284		32.7802		19.9674		2.02811		2.29636		7.24564		2.00455			0		0		0		0		0		0
	06/28/2017	28.2		286		32.7802		19.9674		2.02811		2.29636		7.24564		2.00455			0		0		0		0		0		0
	06/28/2017	28.2		288		32.7802		19.9674		2.02811		2.29636		7.24564		2.00455			0		0		0		0		0		0
	06/28/2017	28.2		290		32.7802		19.9674		2.02811		2.29636		7.24564		2.00455			0		0		0		0		0		0
	06/28/2017	28.2		292		32.7802		19.9674		2.02811		2.29636		7.24564		2.00455			0		0		0		0		0		0
	06/28/2017	28.2		294		32.7802		19.9674		2.02811		2.29636		7.24564		2.00455			0		0		0		0		0		0
	06/28/2017	28.2		296		32.7802		19.9674		2.02811		2.29636		7.24564		2.00455			0		0		0		0		0		0
	06/28/2017	28.22		298		32.7802		19.9674		2.02811		2.29636		7.24564		2.00455			0		0		0		0		0		0
	06/28/2017	28.23		300		32.7802		19.9674		2.02811		2.29636		7.24564		2.00455			0		0		0		0		0		0
	06/28/2017	28.24		302		32.7802		19.9674		2.02811		2.29636		7.24564		2.00455			0		0		0		0		0		0
	06/28/2017	28.26		304		32.7802		19.9674		2.02811		2.29636		7.24564		2.00455			0		0		0		0		0		0
	06/28/2017	28.26		306		32.7802		19.9674		2.02811		2.29636		7.24564		2.00455			0		0		0		0		0		0
	06/28/2017	28.25		308		32.7802		19.9674		2.02811		2.29636		7.24564		2.00455			0		0		0		0		0		0
	06/28/2017	28.25		310		32.7802		19.9674		2.02811		2.29636		7.24564		2.00455			0		0		0		0		0		0
	06/28/2017	28.25		312		32.7802		19.9674		2.02811		2.29636		7.24564		2.00455			0		0		0		0		0		0
	06/28/2017	28.27		314		32.7802		19.9674		2.02811		2.29636		7.24564		2.00455			0		0		0		0		0		0
	06/28/2017	28.27		316		32.7802		19.9674		2.02811		2.29636		7.24564		2.00455			0		0		0		0		0		0
	06/28/2017	28.28		318		32.7802		19.9674		2.02811		2.29636		7.24564		2.00455			0		0		0		0		0		0
	06/28/2017	28.29		320		32.7802		19.9674		2.02811		2.29636		7.24564		2.00455			0		0		0		0		0		0
	06/28/2017	28.28		322		32.7802		19.9674		2.02811		2.29636		7.24564		2.00455			0		0		0		0		0		0
	06/28/2017	28.3		324		32.7802		19.9674		2.02811		2.29636		7.24564		2.00455			0		0		0		0		0		0
	06/28/2017	28.3		326		32.7802		19.9674		2.02811		2.29636		7.24564		2.00455			0		0		0		0		0		0
	06/28/2017	28.3		328		32.7802		19.9674		2.02811		2.29636		7.24564		2.00455			0		0		0		0		0		0
	06/28/2017	28.3		330		32.7802		19.9674		2.02811		2.29636		7.24564		2.00455			0		0		0		0		0		0
	06/28/2017	28.32		332		32.7802		19.9674		2.02811		2.29636		7.24564		2.00455			0		0		0		0		0		0
	06/28/2017	28.31		334		32.7802		19.9674		2.02811		2.29636		7.24564		2.00455			0		0		0		0		0		0
	06/28/2017	28.32		336		32.7802		19.9674		2.02811		2.29636		7.24564		2.00455			0		0		0		0		0		0
	06/28/2017	28.33		338		32.7802		19.9674		2.02811		2.29636		7.24564		2.00455			0		0		0		0		0		0
	06/28/2017	28.34		340		32.7802		19.9674		2.02811		2.29636		7.24564		2.00455			0		0		0		0		0		0
	06/28/2017	28.33		342		32.7802		19.9674		2.02811		2.29636		7.24564		2.00455			0		0		0		0		0		0
	06/28/2017	28.33		344		32.7802		19.9674		2.02811		2.29636		7.24564		2.00455			0		0		0		0		0		0
	06/28/2017	28.36		346		32.7802		19.9674		2.02811		2.29636		7.24564		2.00455			0		0		0		0		0		0
	06/28/2017	28.34		348		32.7802		19.9674		2.02811		2.29636		7.24564		2.00455			0		0		0		0		0		0
	06/28/2017	28.33		350		32.7802		19.9674		2.02811		2.29636		7.24564		2.00455			0		0		0		0		0		0
	06/28/2017	28.34		352		32.7802		19.9674		2.02811		2.29636		7.24564		2.00455			0		0		0		0		0		0
	06/28/2017	28.37		354		32.7802		19.9674		2.02811		2.29636		7.24564		2.00455			0		0		0		0		0		0
	06/28/2017	28.36		356		32.7802		19.9674		2.02811		2.29636		7.24564		2.00455			0		0		0		0		0		0
	06/28/2017	28.34		358		32.7802		19.9674		2.02811		2.29636		7.24564		2.00455			0		0		0		0		0		0
	06/28/2017	28.36		360		32.7802		19.9674		2.02811		2.29636		7.24564		2.00455			0		0		0		0		0		0
	06/28/2017	28.36		362		32.7802		19.9674		2.02811		2.29636		7.24564		2.00455			0		0		0		0		0		0
	06/28/2017	28.35		364		32.7802		19.9674		2.02811		2.29636		7.24564		2.00455			0		0		0		0		0		0
	06/28/2017	28.38		366		32.7802		19.9674		2.02811		2.29636		7.24564		2.00455			0		0		0		0		0		0
	06/28/2017	28.34		368		32.7802		19.9674		2.02811		2.29636		7.24564		2.00455			0		0		0		0		0		0
	06/28/2017	28.36		370		32.7802		19.9674		2.02811		2.29636		7.24564		2.00455			0		0		0		0		0		0
	06/28/2017	28.38		372		32.7802		19.9674		2.02811		2.29636		7.24564		2.00455			0		0		0		0		0		0
	06/28/2017	28.38		374		32.7802		19.9674		2.02811		2.29636		7.24564		2.00455			0		0		0		0		0		0
	06/28/2017	28.4		376		32.7802		19.9674		2.02811		2.29636		7.24564		2.00455			0		0		0		0		0		0
	06/28/2017	28.35		378		32.7802		19.9674		2.02811		2.29636		7.24564		2.00455			0		0		0		0		0		0
	06/28/2017	28.35		380		32.7802		19.9674		2.02811		2.29636		7.24564		2.00455			0		0		0		0		0		0
	06/28/2017	28.39		382		32.7802		19.9674		2.02811		2.29636		7.24564		2.00455			0		0		0		0		0		0
	06/28/2017	28.38		384		32.7802		19.9674		2.02811		2.29636		7.24564		2.00455			0		0		0		0		0		0
	06/28/2017	28.38		386		32.7802		19.9674		2.02811		2.29636		7.24564		2.00455			0		0		0		0		0		0
	06/28/2017	28.37		388		32.7802		19.9674		2.02811		2.29636		7.24564		2.00455			0		0		0		0		0		0
	06/28/2017	28.34		390		32.7802		19.9674		2.02811		2.29636		7.24564		2.00455			0		0		0		0		0		0
	06/28/2017	28.35		392		32.7802		19.9674		2.02811		2.29636		7.24564		2.00455			0		0		0		0		0		0
	06/28/2017	28.34		394		32.7802		19.9674		2.02811		2.29636		7.24564		2.00455			0		0		0		0		0		0
	06/28/2017	28.33		396		32.7802		19.9674		2.02811		2.29636		7.24564		2.00455			0		0		0		0		0		0
	06/28/2017	28.31		398		32.7802		19.9674		2.02811		2.29636		7.24564		2.00455			0		0		0		0		0		0
	06/28/2017	28.35		400		32.7802		19.9674		2.02811		2.29636		7.24564		2.00455			0		0		0		0		0		0
	06/28/2017	28.31		402		32.7802		19.9674		2.02811		2.29636		7.24564		2.00455			0		0		0		0		0		0
	06/28/2017	28.32		404		32.7802		19.9674		2.02811		2.29636		7.24564		2.00455			0		0		0		0		0		0
	06/28/2017	28.31		406		32.7802		19.9674		2.02811		2.29636		7.24564		2.00455			0		0		0		0		0		0
	06/28/2017	28.32		408		32.7802		19.9674		2.02811		2.29636		7.24564		2.00455			0		0		0		0		0		0
	06/28/2017	28.31		410		32.7802		19.9674		2.02811		2.29636		7.24564		2.00455			0		0		0		0		0		0
	06/28/2017	28.31		412		32.7802		19.9674		2.02811		2.29636		7.24564		2.00455			0		0		0		0		0		0
	06/28/2017	28.31		414		32.7802		19.9674		2.02811		2.29636		7.24564		2.00455			0		0		0		0		0		0
	06/28/2017	28.3		416		32.7802		19.9674		2.02811		2.29636		7.24564		2.00455			0		0		0		0		0		0
	06/28/2017	28.3		418		32.7802		19.9674		2.02811		2.29636		7.24564		2.00455			0		0		0		0		0		0
	06/28/2017	28.3		420		32.7802		19.9674		2.02811		2.29636		7.24564		2.00455			0		0		0		0		0		0
	06/28/2017	28.3		422		32.7802		19.9674		2.02811		2.29636		7.24564		2.00455			0		0		0		0		0		0
	06/28/2017	28.29		424		32.7802		19.9674		2.02811		2.29636		7.24564		2.00455			0		0		0		0		0		0
	06/28/2017	28.29		426		32.7802		19.9674		2.02811		2.29636		7.24564		2.00455			0		0		0		0		0		0
	06/28/2017	28.31		428		32.7802		19.9674		2.02811		2.29636		7.24564		2.00455			0		0		0		0		0		0
	06/28/2017	28.19		430		32.7802		19.9674		2.02811		2.29636		7.24564		2.00455			0		0		0		0		0		0
	06/28/2017	28.15		432		32.7802		19.9674		2.02811		2.29636		7.24564		2.00455			0		0		0		0		0		0
	06/28/2017	28.14		434		32.7802		19.9674		2.02811		2.29636		7.24564		2.00455			0		0		0		0		0		0
	06/28/2017	28.79		436		0		0		0		0		0		0			0		0		0		0		0		0
	06/28/2017	19.53		438		0		0		0		0		0		0			0		0		0		0		0		0
	06/28/2017	17.98		440		0		0		0		0		0		0			0		0		0		0		0		0
	06/28/2017	17.43		442		0		0		0		0		0		0			0		0		0		0		0		0
	06/28/2017	17.06		444		0		0		0		0		0		0			0		0		0		0		0		0
	06/28/2017	16.84		446		0		0		0		0		0		0			0		0		0		0		0		0
	06/28/2017	16.67		448		0		0		0		0		0		0			0		0		0		0		0		0
	06/28/2017	16.53		450		0		0		0		0		0		0			0		0		0		0		0		0
	06/28/2017	16.4		452		0		0		0		0		0		0			0		0		0		0		0		0
	06/28/2017	16.27		454		0		0		0		0		0		0			0		0		0		0		0		0
	06/28/2017	16.13		456		0		0		0		0		0		0			0		0		0		0		0		0
	06/29/2017	16		458		0		0		0		0		0		0			0		0		0		0		0		0
	06/29/2017	15.9		460		0		0		0		0		0		0			0		0		0		0		0		0
	06/29/2017	15.81		462		0		0		0		0		0		0			0		0		0		0		0		0
	06/29/2017	15.72		464		0		0		0		0		0		0			0		0		0		0		0		0
	06/29/2017	15.62		466		0		0		0		0		0		0			0		0		0		0		0		0
	06/29/2017	15.54		468		0		0		0		0		0		0			0		0		0		0		0		0
	06/29/2017	15.45		470		0		0		0		0		0		0			0		0		0		0		0		0
	06/29/2017	15.37		472		0		0		0		0		0		0			0		0		0		0		0		0
	06/29/2017	15.3		474		0		0		0		0		0		0			0		0		0		0		0		0
	06/29/2017	15.25		476		0		0		0		0		0		0			0		0		0		0		0		0
	06/29/2017	15.19		478		0		0		0		0		0		0			0		0		0		0		0		0
	06/29/2017	15.12		480		0		0		0		0		0		0			0		0		0		0		0		0
	06/29/2017	15.07		482		0		0		0		0		0		0			0		0		0		0		0		0
	06/29/2017	15.04		484		0		0		0		0		0		0			0		0		0		0		0		0
	06/29/2017	15.04		486		0		0		0		0		0		0			0		0		0		0		0		0
	06/29/2017	15.08		488		0		0		0		0		0		0			0		0		0		0		0		0
	06/29/2017	15.08		490		0		0		0		0		0		0			0		0		0		0		0		0
	06/29/2017	15.06		492		0		0		0		0		0		0			0		0		0		0		0		0
	06/29/2017	15.02		494		0		0		0		0		0		0			0		0		0		0		0		0
	06/29/2017	14.97		496		0		0		0		0		0		0			0		0		0		0		0		0
	06/29/2017	14.92		498		0		0		0		0		0		0			0		0		0		0		0		0
	06/29/2017	14.87		500		0		0		0		0		0		0			0		0		0		0		0		0
	06/29/2017	14.82		502		0		0		0		0		0		0			0		0		0		0		0		0
	06/29/2017	14.78		504		0		0		0		0		0		0			0		0		0		0		0		0
	06/29/2017	14.74		506		0		0		0		0		0		0			0		0		0		0		0		0
	06/29/2017	14.7		508		0		0		0		0		0		0			0		0		0		0		0		0
	06/29/2017	14.66		510		0		0		0		0		0		0			0		0		0		0		0		0
	06/29/2017	14.63		512		0		0		0		0		0		0			0		0		0		0		0		0
	06/29/2017	14.61		514		0		0		0		0		0		0			0		0		0		0		0		0
	06/29/2017	14.61		516		0		0		0		0		0		0			0		0		0		0		0		0
	06/29/2017	14.63		518		0		0		0		0		0		0			0		0		0		0		0		0
	06/29/2017	14.69		520		0		0		0		0		0		0			0		0		0		0		0		0
	06/29/2017	14.7		522		0		0		0		0		0		0			0		0		0		0		0		0
	06/29/2017	14.7		524		0		0		0		0		0		0			0		0		0		0		0		0
	06/29/2017	14.69		526		0		0		0		0		0		0			0		0		0		0		0		0
	06/29/2017	14.68		528		0		0		0		0		0		0			0		0		0		0		0		0
	06/29/2017	14.65		530		0		0		0		0		0		0			0		0		0		0		0		0
	06/29/2017	14.62		532		0		0		0		0		0		0			0		0		0		0		0		0
	06/29/2017	14.54		534		0		0		0		0		0		0			0		0		0		0		0		0
	06/29/2017	14.4		536		0		0		0		0		0		0			0		0		0		0		0		0
	06/29/2017	14.15		538		0		0		0		0		0		0			0		0		0		0		0		0
	06/29/2017	13.81		540		0		0		0		0		0		0			0		0		0		0		0		0
	06/29/2017	9.48		542		0		0		0		0		0		0			0		0		0		0		0		0
	06/29/2017	8.33		544		0		0		0		0		0		0			0		0		0		0		0		0
	06/29/2017	7.91		546		0		0		0		0		0		0			0		0		0		0		0		0
	06/29/2017	7.45		548		0		0		0		0		0		0			0		0		0		0		0		0
	06/29/2017	7.04		550		0		0		0		0		0		0			0		0		0		0		0		0
	06/29/2017	6.72		552		0		0		0		0		0		0			0		0		0		0		0		0
	06/29/2017	6.49		554		0		0		0		0		0		0			0		0		0		0		0		0
	06/29/2017	6.26		556		0		0		0		0		0		0			0		0		0		0		0		0
	06/29/2017	6.04		558		0		0		0		0		0		0			0		0		0		0		0		0
	06/29/2017	5.84		560		0		0		0		0		0		0			0		0		0		0		0		0
	06/29/2017	5.67		562		0		0		0		0		0		0			0		0		0		0		0		0
	06/29/2017	5.49		564		0		0		0		0		0		0			0		0		0		0		0		0
	06/29/2017	5.34		566		0		0		0		0		0		0			0		0		0		0		0		0
	06/29/2017	5.21		568		0		0		0		0		0		0			0		0		0		0		0		0
	06/29/2017	5.09		570		0		0		0		0		0		0			0		0		0		0		0		0
	06/29/2017	5.01		572		0		0		0		0		0		0			0		0		0		0		0		0
	06/29/2017	4.93		574		0		0		0		0		0		0			0		0		0		0		0		0
	06/29/2017	4.86		576		0		0		0		0		0		0			0		0		0		0		0		0
	06/29/2017	4.79		578		0		0		0		0		0		0			0		0		0		0		0		0
	06/29/2017	4.73		580		0		0		0		0		0		0			0		0		0		0		0		0
	06/29/2017	4.67		582		0		0		0		0		0		0			0		0		0		0		0		0
	06/29/2017	4.62		584		0		0		0		0		0		0			0		0		0		0		0		0
	06/29/2017	4.58		586		0		0		0		0		0		0			0		0		0		0		0		0
	06/29/2017	4.53		588		0		0		0		0		0		0			0		0		0		0		0		0
	06/29/2017	4.31		590		0		0		0		0		0		0			0		0		0		0		0		0
	06/29/2017	4.2		592		0		0		0		0		0		0			0		0		0		0		0		0
	06/29/2017	4.13		594		0		0		0		0		0		0			0		0		0		0		0		0
	06/29/2017	4.09		596		0		0		0		0		0		0			0		0		0		0		0		0
	06/29/2017	4.05		598		0		0		0		0		0		0			0		0		0		0		0		0
	06/29/2017	3.99		600		0		0		0		0		0		0			0		0		0		0		0		0
	06/29/2017	3.92		602		0		0		0		0		0		0			0		0		0		0		0		0
	06/29/2017	3.86		604		0		0		0		0		0		0			0		0		0		0		0		0
	06/29/2017	3.82		606		0		0		0		0		0		0			0		0		0		0		0		0
	06/29/2017	3.78		608		0		0		0		0		0		0			0		0		0		0		0		0
	06/29/2017	3.74		610		0		0		0		0		0		0			0		0		0		0		0		0
	06/29/2017	3.71		612		0		0		0		0		0		0			0		0		0		0		0		0
	06/29/2017	3.68		614		0		0		0		0		0		0			0		0		0		0		0		0
	06/29/2017	3.65		616		0		0		0		0		0		0			0		0		0		0		0		0
	06/29/2017	3.63		618		0		0		0		0		0		0			0		0		0		0		0		0
	06/29/2017	3.62		620		0		0		0		0		0		0			0		0		0		0		0		0
	06/29/2017	3.6		622		0		0		0		0		0		0			0		0		0		0		0		0
	06/29/2017	3.58		624		0		0		0		0		0		0			0		0		0		0		0		0
	06/29/2017	3.57		626		0		0		0		0		0		0			0		0		0		0		0		0
	06/29/2017	3.56		628		0		0		0		0		0		0			0		0		0		0		0		0
	06/29/2017	3.55		630		0		0		0		0		0		0			0		0		0		0		0		0
	06/29/2017	3.54		632		0		0		0		0		0		0			0		0		0		0		0		0
	06/29/2017	3.52		634		0		0		0		0		0		0			0		0		0		0		0		0
	06/29/2017	3.51		636		0		0		0		0		0		0			0		0		0		0		0		0
	06/29/2017	3.49		638		0		0		0		0		0		0			0		0		0		0		0		0
	06/29/2017	3.47		640		0		0		0		0		0		0			0		0		0		0		0		0
	06/29/2017	3.44		642		0		0		0		0		0		0			0		0		0		0		0		0
	06/29/2017	3.42		644		0		0		0		0		0		0			0		0		0		0		0		0
	06/29/2017	3.39		646		0		0		0		0		0		0			0		0		0		0		0		0
	06/29/2017	3.37		648		0		0		0		0		0		0			0		0		0		0		0		0
	06/29/2017	3.34		650		0		0		0		0		0		0			0		0		0		0		0		0
	06/29/2017	3.32		652		0		0		0		0		0		0			0		0		0		0		0		0
	06/29/2017	3.3		654		0		0		0		0		0		0			0		0		0		0		0		0
	06/29/2017	3.28		656		0		0		0		0		0		0			0		0		0		0		0		0
	06/29/2017	3.25		658		0		0		0		0		0		0			0		0		0		0		0		0
	06/29/2017	3.24		660		0		0		0		0		0		0			0		0		0		0		0		0
	06/29/2017	3.22		662		0		0		0				0		0			0		0		0		0		0		0
	06/29/2017	3.2		664		0		0		0				0		0			0		0		0		0		0		0
	06/29/2017	3.18		666		0		0		0				0		0			0		0		0		0		0		0
	06/29/2017	3.17		668		0		0		0				0		0			0		0		0		0		0		0
	06/29/2017	3.15		670		0		0		0				0		0			0		0		0		0		0		0
	06/29/2017	3.13		672		0		0		0				0		0			0		0		0		0		0		0
	06/29/2017	3.11		674		0		0		0				0		0			0		0		0		0		0		0
	06/29/2017	3.1		676		0		0		0				0		0			0		0		0		0		0		0
	06/29/2017	3.08		678		0		0		0				0		0			0		0		0		0		0		0
	06/29/2017	3.04		680		0		0		0				0		0			0		0		0		0		0		0
	06/29/2017	3.13		682		0		0		0				0		0			0		0		0		0		0		0
	06/29/2017	3.1		684		0		0		0						0			0		0		0		0		0		0
	06/29/2017	3.09		686		0		0		0						0			0		0		0		0		0		0
	06/29/2017	3.07		688		0		0		0						0			0		0		0		0		0		0
	06/29/2017	3.06		690		0		0		0						0			0		0		0		0		0		0
	06/29/2017	3.04		692		0		0		0						0			0		0		0		0		0		0
	06/29/2017	3.03		694		0		0		0						0			0		0		0		0		0		0
	06/29/2017	2.81		696		0		0		0						0			0		0		0		0		0		0
	06/29/2017	2.8		698		0		0		0						0			0		0		0		0		0		0
	06/29/2017	3.1		700		0		0		0						0			0		0		0		0		0		0
	06/29/2017	3.08		702		0		0		0						0			0		0		0		0		0		0
	06/29/2017	3.07		704		0		0		0						0			0		0		0		0		0		0
	06/29/2017	3.06		706		0		0		0						0			0		0		0		0		0		0
	06/29/2017	3.05		708		0		0		0						0			0		0		0		0		0		0
	06/29/2017	3.04		710		0		0		0						0			0		0		0		0		0		0
	06/29/2017	3.02		712		0		0		0						0			0		0		0		0		0		0
	06/29/2017	3.01		714		0		0		0						0			0		0		0		0		0		0
	06/29/2017	3		716		0		0		0						0			0		0		0		0		0		0
	06/29/2017	3.01		718		0		0		0						0			0		0		0		0		0		0
	06/29/2017	3		720		0		0		0						0			0		0		0		0		0		0
	06/29/2017	3		722		0		0		0						0			0		0		0		0		0		0
	06/29/2017	2.99		724		0		0		0						0			0		0		0		0		0		0
	06/29/2017	2.98		726		0		0		0						0			0		0		0		0		0		0
	06/29/2017	2.98		728		0		0		0						0			0		0		0		0		0		0
	06/29/2017	2.96		730		0		0		0						0			0		0		0		0		0		0
	06/29/2017	2.96		732		0		0		0						0			0		0		0		0		0		0
	06/29/2017	2.95		734		0		0		0						0			0		0		0		0		0		0
	06/29/2017	2.94		736		0		0		0						0			0		0		0		0		0		0
	06/29/2017	2.93		738		0		0		0						0			0		0		0		0		0		0
	06/29/2017	2.92		740		0		0		0						0			0		0		0		0		0		0
	06/29/2017	2.91		742		0		0		0						0			0		0		0		0		0		0
	06/29/2017	2.9		744		0		0		0						0			0		0		0		0		0		0
	06/29/2017	2.9		746		0		0		0						0			0		0		0		0		0		0
	06/29/2017	2.89		748		0		0		0						0			0		0		0		0		0		0
	06/29/2017	2.89		750		0		0		0						0			0		0		0		0		0		0
	06/29/2017	2.88		752		0		0		0						0			0		0		0		0		0		0
	06/29/2017	2.87		754		0		0		0						0			0		0		0		0		0		0
	06/29/2017	2.87		756		0		0		0						0			0		0		0		0		0		0
	06/29/2017	2.86		758		0		0		0						0			0		0		0		0		0		0
	06/29/2017	2.85		760		0		0		0						0			0		0		0		0		0		0
	06/29/2017	2.85		762		0		0		0						0			0		0		0		0		0		0
	06/29/2017	2.84		764		0		0		0						0			0		0		0		0		0		0
	06/29/2017	2.83		766		0		0		0						0			0		0		0		0		0		0
	06/29/2017	2.83		768		0		0		0						0			0		0		0		0		0		0
	06/29/2017	2.82		770		0		0		0						0			0		0		0		0		0		0
	06/29/2017	2.82		772		0		0		0						0			0		0		0		0		0		0
	06/29/2017	2.81		774		0		0		0						0			0		0		0		0		0		0
	06/29/2017	2.81		776		0		0		0						0			0		0		0		0		0		0
	06/29/2017	2.8		778		0		0		0						0			0		0		0		0		0		0
	06/29/2017	2.8		780		0		0		0						0			0		0		0		0		0		0
	06/29/2017	2.8		782		0		0		0						0			0		0		0		0		0		0
	06/29/2017	2.79		784		0		0		0						0			0		0		0		0		0		0
	06/29/2017	2.79		786		0		0		0						0			0		0		0		0		0		0
	06/29/2017	2.78		788		0		0		0						0			0		0		0		0		0		0
	06/29/2017	2.78		790		0		0		0						0			0		0		0		0		0		0
	06/29/2017	2.77		792		0		0		0						0			0		0		0		0		0		0
	06/29/2017	2.76		794		0		0		0						0			0		0		0		0		0		0
	06/29/2017	2.76		796		0		0		0						0			0		0		0		0		0		0
	06/29/2017	2.75		798		0		0		0						0			0		0		0		0		0		0
	06/29/2017	2.75		800		0		0		0						0			0		0		0		0		0		0
	06/29/2017	2.74		802		0		0		0						0			0		0		0		0		0		0
	06/29/2017	2.74		804		0		0		0						0			0		0		0		0		0		0
	06/29/2017	2.73		806		0		0		0						0			0		0		0		0		0		0
	06/29/2017	2.73		808		0		0		0						0			0		0		0		0		0		0
	06/29/2017	2.72		810		0		0		0						0			0		0		0		0		0		0
	06/29/2017	2.72		812		0		0		0						0			0		0		0		0		0		0
	06/29/2017	2.71		814		0		0		0						0			0		0		0		0		0		0
	06/29/2017	2.7		816		0		0		0						0			0		0		0		0		0		0
	06/29/2017	2.7		818		0		0		0						0			0		0		0		0		0		0
	06/29/2017	2.69		820		0		0		0						0			0		0		0		0		0		0
	06/29/2017	2.69		822		0		0		0						0			0		0		0		0		0		0
	06/29/2017	2.68		824		0		0		0						0			0		0		0		0		0		0
	06/29/2017	2.67		826		0		0		0						0			0		0		0		0		0		0
	06/29/2017	2.67		828		0		0		0						0			0		0		0		0		0		0
	06/29/2017	2.67		830		0		0		0						0			0		0		0		0		0		0
	06/29/2017	2.67		832		0		0		0						0			0		0		0		0		0		0
	06/29/2017	2.66		834		0		0		0						0			0		0		0		0		0		0
	06/29/2017	2.65		836		0		0		0						0			0		0		0		0		0		0
	06/29/2017	2.64		838		0		0		0						0			0		0		0		0		0		0
	06/29/2017	2.64		840		0		0		0						0			0		0		0		0		0		0
	06/29/2017	2.63		842		0		0		0						0			0		0		0		0		0		0
	06/29/2017	2.63		844		0		0		0						0			0		0		0		0		0		0
	06/29/2017	2.61		846		0		0		0						0			0		0		0		0		0		0
	06/29/2017	2.61		848		0		0		0						0			0		0		0		0		0		0
	06/29/2017	2.6		850		0		0		0						0			0		0		0		0		0		0
	06/29/2017	2.59		852		0		0		0						0			0		0		0		0		0		0
	06/29/2017	2.58		854		0		0		0						0			0		0		0		0		0		0
	06/29/2017	2.57		856		0		0		0						0			0		0		0		0		0		0
	06/29/2017	2.56		858		0		0		0						0			0		0		0		0		0		0
	06/29/2017	2.55		860		0		0		0						0			0		0		0		0		0		0
	06/29/2017	2.55		862		0		0		0						0			0		0		0		0		0		0
	06/29/2017	2.52		864		0		0		0						0			0		0		0		0		0		0
	06/29/2017	2.52		866		0		0		0						0			0		0		0		0		0		0
	06/29/2017	2.51		868		0		0		0						0			0		0		0		0		0		0
	06/29/2017	2.5		870		0		0		0						0			0		0		0		0		0		0
	06/29/2017	2.49		872		0		0		0						0			0		0		0		0		0		0
	06/29/2017	2.48		874		0		0		0						0			0		0		0		0		0		0
	06/29/2017	2.47		876		0		0		0						0			0		0		0		0		0		0
	06/29/2017	2.45		878		0		0		0						0			0		0		0		0		0		0
	06/29/2017	2.44		880		0		0		0						0			0		0		0		0		0		0
	06/29/2017	2.43		882		0		0		0						0			0		0		0		0		0		0
	06/29/2017	2.43		884		0		0		0						0			0		0		0		0		0		0
	06/29/2017	2.42		886		0		0		0						0			0		0		0		0		0		0
	06/29/2017	2.4		888		0		0		0						0			0		0		0		0		0		0
	06/29/2017	2.39		890		0		0		0						0			0		0		0		0		0		0
	06/29/2017	2.37		892		0		0		0						0			0		0		0		0		0		0
	06/29/2017	2.37		894		0		0		0						0			0		0		0		0		0		0
	06/29/2017	2.35		896		0		0		0						0			0		0		0		0		0		0
	06/29/2017	2.34		898		0		0		0						0			0		0		0		0		0		0
	06/29/2017	2.34		900		0		0		0						0			0		0		0		0		0		0
	06/29/2017	2.33		902		0		0		0						0			0		0		0		0		0		0
	06/29/2017	2.32		904		0		0		0						0			0		0		0		0		0		0
	06/29/2017	2.31		906		0		0		0						0			0		0		0		0		0		0
	06/29/2017	2.32		908		0		0		0						0			0		0		0		0		0		0
	06/29/2017	2.32		910		0		0		0						0			0		0		0		0		0		0
	06/29/2017	2.32		912		0		0		0						0			0		0		0		0		0		0
	06/29/2017	2.31		914		0		0		0						0			0		0		0		0		0		0
	06/29/2017	2.31		916		0		0		0						0			0		0		0		0		0		0
	06/29/2017	2.3		918		0		0		0						0			0		0		0		0		0		0
	06/29/2017	2.3		920		0		0		0						0			0		0		0		0		0		0
	06/29/2017	2.29		922		0		0		0						0			0		0		0		0		0		0
	06/29/2017	2.29		924		0		0		0						0			0		0		0		0		0		0
	06/29/2017	2.29		926		0		0		0						0			0		0		0		0		0		0
	06/29/2017	2.29		928		0		0		0						0			0		0		0		0		0		0
	06/29/2017	2.28		930		0		0		0						0			0		0		0		0		0		0
	06/29/2017	2.29		932		0		0		0						0					0		0		0		0		0
	06/29/2017	2.28		934		0		0		0						0					0		0		0		0		0
	06/29/2017	2.27		936		0		0		0						0					0		0		0		0		0
	06/29/2017	2.27		938		0		0		0						0					0		0		0		0		0
	06/29/2017	2.26		940		0		0		0						0					0		0		0		0		0
	06/29/2017	2.26		942		0		0		0						0					0		0		0		0		0
	06/29/2017	2.25		944		0		0		0						0					0		0		0		0		0
	06/29/2017	2.25		946		0		0		0						0					0		0		0		0		0
	06/29/2017	2.24		948		0		0		0						0					0		0		0		0		0
	06/29/2017	2.25		950		0		0		0						0					0		0		0		0		0
	06/29/2017	2.24		952		0		0		0						0					0		0		0		0		0
	06/29/2017	2.23		954		0		0		0						0					0		0		0		0		0
	06/29/2017	2.23		956		0		0		0						0					0		0		0		0		0
	06/29/2017	2.23		958		0		0		0						0					0		0		0		0		0
	06/29/2017	2.23		960		0		0		0						0					0		0		0		0		0
	06/29/2017	2.22		962		0		0		0						0					0		0		0		0		0
	06/29/2017	2.22		964		0		0		0						0					0		0		0		0		0
	06/29/2017	2.22		966		0		0		0						0					0		0		0		0		0
	06/29/2017	2.23		968		0		0		0						0					0		0		0		0		0
	06/29/2017	2.21		970		0		0		0						0					0		0		0		0		0
	06/29/2017	2.22		972		0		0		0						0					0		0		0		0		0
	06/29/2017	2.21		974		0		0		0						0					0		0		0		0		0
	06/29/2017	2.21		976		0		0		0						0					0		0		0		0		0
	06/29/2017	2.21		978		0		0		0						0					0		0		0		0		0
	06/29/2017	2.21		980		0		0		0						0					0		0		0		0		0
	06/29/2017	2.21		982		0		0		0						0					0		0		0		0		0
	06/29/2017	2.2		984		0		0		0						0					0		0		0		0		0
	06/29/2017	2.2		986		0		0		0						0					0		0		0		0		0
	06/29/2017	2.19		988		0		0		0						0					0		0		0		0		0
	06/29/2017	2.19		990		0		0		0						0							0		0		0		0
	06/29/2017	2.19		992		0		0		0						0							0		0		0		0
	06/29/2017	2.18		994		0		0		0						0							0		0		0		0
	06/29/2017	2.17		996		0		0		0						0							0		0		0		0
	06/29/2017	2.17		998		0		0		0						0							0		0		0		0
	06/29/2017	2.17		1000		0		0		0						0							0		0		0		0
	06/29/2017	2.16		1002		0		0		0						0							0		0		0		0
	06/29/2017	2.11		1004		0		0		0						0							0		0		0		0
	06/29/2017	2.16		1006		0		0		0						0							0		0		0		0
	06/29/2017	2.13		1008		0		0		0						0							0		0		0		0
	06/29/2017	2.19		1010		0		0		0						0							0		0		0		0
	06/29/2017	2.2		1012		0		0		0						0							0		0		0		0
				1014		0		0		0						0							0		0		0		0
				1016		0		0		0						0							0		0		0		0
				1018		0		0		0						0							0		0		0		0
				1020		0		0		0						0							0		0		0		0
				1022		0		0		0						0							0		0		0		0
				1024		0		0		0						0							0		0		0		0
				1026		0		0		0						0							0		0		0		0
				1028		0		0		0						0							0		0		0		0
				1030		0		0		0						0							0		0		0		0
				1032		0		0		0						0							0		0		0		0
				1034		0		0		0						0							0		0		0		0
				1036		0		0		0						0							0		0		0		0
				1038		0		0		0						0							0		0		0		0
				1040		0		0		0						0							0		0		0		0
				1042		0		0		0						0							0		0		0		0
				1044		0		0		0						0							0		0		0		0
				1046		0		0		0						0							0		0		0		0
				1048		0		0		0						0							0		0		0		0
				1050		0		0		0						0							0		0		0		0
				1052		0		0		0						0							0		0		0		0
				1054		0		0		0						0							0		0		0		0
				1056		0		0		0						0							0		0		0		0
				1058		0		0		0						0							0		0		0		0
				1060		0		0		0						0							0		0		0		0
				1062		0		0		0						0							0		0		0		0
				1064		0		0		0						0							0		0		0		0
				1066		0		0		0						0							0		0		0		0
				1068		0		0		0						0							0		0		0		0
				1070		0		0		0						0							0		0		0		0
				1072		0		0		0						0							0		0		0		0
				1074		0		0		0						0							0		0		0		0
				1076		0		0		0						0							0		0		0		0
				1078		0		0		0						0							0		0		0		0
				1080		0		0		0						0							0		0		0		0
				1082		0		0		0						0							0		0		0		0
				1084		0		0		0						0							0		0		0		0
				1086		0		0		0						0							0		0		0		0
				1088		0		0		0						0							0		0		0		0
				1090		0		0		0						0							0		0		0		0
				1092		0		0		0						0							0		0		0		0
				1094		0		0		0						0							0		0		0		0
				1096		0		0		0						0							0		0		0		0
				1098		0		0		0						0							0		0		0		0
				1100		0		0		0						0							0		0		0		0
				1102		0		0		0						0							0		0		0		0
				1104		0		0		0						0							0		0		0		0
				1106		0		0		0						0							0		0		0		0
				1108		0		0		0						0							0		0		0		0
				1110		0		0		0						0							0		0		0		0
				1112		0		0		0						0							0		0		0		0
				1114		0		0		0						0							0		0		0		0
				1116		0		0		0						0							0		0		0		0
				1118		0		0		0						0							0		0		0		0
				1120		0		0		0						0							0		0		0		0
				1122		0		0		0						0							0		0		0		0
				1124		0		0		0						0							0		0		0		0
				1126		0		0		0						0							0		0		0		0
				1128		0		0		0						0							0		0		0		0
				1130		0		0		0						0							0		0		0		0
				1132		0		0		0						0							0		0		0		0
				1134		0		0		0						0							0		0		0		0
				1136		0		0		0						0							0		0		0		0
				1138		0		0		0						0							0		0		0		0
				1140		0		0		0						0							0		0		0		0
				1142		0		0		0						0							0		0		0		0
				1144		0		0		0						0							0		0		0		0
				1146		0		0		0						0							0		0		0		0
				1148		0		0		0						0							0		0		0		0
				1150		0		0		0						0							0		0		0		0
				1152		0		0		0						0							0		0		0		0
				1154		0		0		0						0							0		0		0		0
				1156		0		0		0						0							0		0		0		0
				1158		0		0		0						0							0		0		0		0
				1160		0		0		0						0							0		0		0		0
				1162		0		0		0						0							0		0		0		0
				1164		0		0		0						0							0		0		0		0
				1166		0		0		0						0							0		0		0		0
				1168		0		0		0						0							0		0		0		0
				1170		0		0		0						0							0		0		0		0
				1172		0		0		0						0							0		0		0		0
				1174		0		0		0						0							0		0		0		0
				1176		0		0		0						0							0		0		0		0
				1178		0		0		0						0							0		0		0		0
				1180		0		0		0						0							0		0		0		0
				1182		0		0		0						0							0		0		0		0
				1184		0		0		0						0							0		0		0		0
				1186		0		0		0						0							0		0		0		0
				1188		0		0		0						0							0		0		0		0
				1190		0		0		0						0							0		0		0		0
				1192		0		0		0						0							0		0		0		0
				1194		0		0		0						0							0		0		0		0
				1196		0		0		0						0							0		0		0		0
				1198		0		0		0						0							0		0		0		0
				1200		0		0		0						0							0		0		0		0
				1202		0		0		0						0							0		0		0		0
				1204		0		0		0						0							0		0		0		0
				1206		0		0		0						0							0		0		0		0
				1208		0		0		0						0							0		0		0		0
				1210		0		0		0						0							0		0		0		0
				1212		0		0		0						0							0		0		0		0
				1214		0		0		0						0							0		0		0		0
				1216		0		0		0						0							0		0		0		0
				1218		0		0		0						0							0		0		0		0
				1220		0		0		0						0							0		0		0		0
				1222		0		0		0						0							0		0		0		0
				1224		0		0		0						0							0		0		0		0
				1226		0		0		0						0							0		0		0		0
				1228		0		0		0						0							0		0		0		0
				1230		0		0		0						0							0		0		0		0
				1232		0		0		0						0							0		0		0		0
				1234		0		0		0						0							0		0		0		0
				1236		0		0		0						0							0		0		0		0
				1238		0		0		0						0							0		0		0		0
				1240		0		0		0						0							0		0		0		0
				1242		0		0		0						0							0		0		0		0
				1244		0		0		0						0							0		0		0		0
				1246		0		0		0						0							0		0		0		0
				1248		0		0		0						0							0		0		0		0
				1250		0		0		0						0							0		0		0		0
				1252		0		0		0						0							0		0		0		0
				1254		0		0		0						0							0		0		0		0
				1256		0		0		0						0							0		0		0		0
				1258		0		0		0						0							0		0		0		0
				1260		0		0		0						0							0		0		0		0
				1262		0		0		0						0							0		0		0		0
				1264		0		0		0						0							0		0		0		0
				1266		0		0		0						0							0		0		0		0
				1268		0		0		0						0							0		0		0		0
				1270		0		0		0						0							0		0		0		0
				1272		0		0		0						0							0		0		0		0
				1274		0		0		0						0							0		0		0		0
				1276		0		0		0						0							0		0		0		0
				1278		0		0		0						0							0		0		0		0
				1280		0		0		0						0							0		0		0		0
				1282		0		0		0						0							0		0		0		0
				1284		0		0		0						0							0		0		0		0
				1286		0		0		0						0							0		0		0		0
				1288		0		0		0						0							0		0		0		0
				1290		0		0		0						0							0		0		0		0
				1292		0		0		0						0							0		0		0		0
				1294		0		0		0						0							0		0		0		0
				1296		0		0		0						0							0		0		0		0
				1298		0		0		0						0							0		0		0		0
				1300		0		0		0						0							0		0		0		0
				1302		0		0		0						0							0		0		0		0
				1304		0		0		0						0							0		0		0		0
				1306		0		0		0						0							0		0		0		0
				1308		0		0		0						0							0		0		0		0
				1310		0		0		0						0							0		0		0		0
				1312		0		0		0						0							0		0		0		0
				1314		0		0		0						0							0		0		0		0
				1316		0		0		0						0							0		0		0		0
				1318		0		0		0						0							0		0		0		0
				1320		0		0		0						0							0		0		0		0
				1322		0		0		0						0							0		0		0		0
				1324		0		0		0						0							0		0		0		0
				1326		0		0		0						0							0		0		0		0
				1328		0		0		0						0							0		0		0		0
				1330		0		0		0						0							0		0		0		0
				1332		0		0		0						0							0		0		0		0
				1334		0		0		0						0							0		0		0		0
				1336		0		0		0						0							0		0		0		0
				1338		0		0		0						0							0		0		0		0
				1340		0		0		0						0							0		0		0		0
				1342		0		0		0						0							0		0		0		0
				1344		0		0		0						0							0		0		0		0
				1346		0		0		0						0							0		0		0		0
				1348		0		0		0						0							0		0		0		0
				1350		0		0		0						0							0		0		0		0
				1352		0		0		0						0							0		0		0		0
				1354		0		0		0						0							0		0		0		0
				1356		0		0		0						0							0		0		0		0
				1358		0		0		0						0							0		0		0		0
				1360		0		0		0						0							0		0		0		0
				1362		0		0		0						0							0		0		0		0
				1364		0		0		0						0							0		0		0		0
				1366		0		0		0						0							0		0		0		0
				1368		0		0		0						0							0		0		0		0
				1370		0		0		0						0							0		0		0		0
				1372		0		0		0						0							0		0		0		0
				1374		0		0		0						0							0		0		0		0
				1376		0		0		0						0							0		0		0		0
				1378		0		0		0						0							0		0		0		0
				1380		0		0		0						0							0		0		0		0
				1382		0		0		0						0							0		0		0		0
				1384		0		0		0						0							0		0		0		0
				1386		0		0		0						0							0		0		0		0
				1388		0		0		0						0							0		0		0		0
				1390		0		0		0						0							0		0		0		0
				1392		0		0		0						0							0		0		0		0
				1394		0		0		0						0							0		0		0		0
				1396		0		0		0						0							0		0		0		0
				1398		0		0		0						0							0		0		0		0
				1400		0		0		0						0							0		0		0		0
				1402		0		0		0						0							0		0		0		0
				1404		0		0		0						0							0		0		0		0
				1406		0		0		0						0							0		0		0		0
				1408		0		0		0						0							0		0		0		0
				1410		0		0		0						0							0		0		0		0
				1412		0		0		0						0							0		0		0		0
				1414		0		0		0						0							0		0		0		0
				1416		0		0		0						0							0		0		0		0
				1418		0		0		0						0							0		0		0		0
				1420		0		0		0						0							0		0		0		0
				1422		0		0		0						0							0		0		0		0
				1424		0		0		0						0							0		0		0		0
				1426		0		0		0						0							0		0		0		0
				1428		0		0		0						0							0		0		0		0
				1430		0		0		0						0							0		0		0		0
				1432		0		0		0						0							0		0		0		0
				1434		0		0		0						0							0		0		0		0
				1436		0		0		0						0							0		0		0		0
				1438		0		0		0						0							0		0		0		0
				1440		0		0		0						0							0		0		0		0
				1442		0		0		0						0							0		0		0		0
				1444		0		0		0						0							0		0		0		0
				1446		0		0		0						0							0		0		0		0
				1448		0		0		0						0							0		0		0		0
				1450		0		0		0						0							0		0		0		0
				1452		0		0		0						0							0		0		0		0
				1454		0		0		0						0							0		0		0		0
				1456		0		0		0						0							0		0		0		0
				1458		0		0		0						0							0		0		0		0
				1460		0		0		0						0							0		0		0		0
				1462		0		0		0						0							0		0		0		0
				1464		0		0		0						0							0		0		0		0
				1466		0		0		0						0							0		0		0		0
				1468		0		0		0						0							0		0		0		0
				1470		0		0		0						0							0		0		0		0
				1472		0		0		0						0							0		0		0		0
				1474		0		0		0						0							0		0		0		0
				1476		0		0		0						0							0		0		0		0
				1478		0		0		0						0							0		0		0		0
				1480		0		0		0						0							0		0		0		0
				1482		0		0		0						0							0		0		0		0
				1484		0		0		0						0							0		0		0		0
				1486		0		0		0						0							0		0		0		0
				1488		0		0		0						0							0		0		0		0
				1490		0		0		0						0							0		0		0		0
				1492		0		0		0						0							0		0		0		0
				1494		0		0		0						0							0		0		0		0
				1496		0		0		0						0							0		0		0		0
				1498		0		0		0						0							0		0		0		0
				1500		0		0		0						0							0		0		0		0
				1502		0		0		0						0									0		0		0
				1504		0		0		0						0									0		0		0
				1506		0		0		0						0									0		0		0
				1508		0		0		0						0									0		0		0
				1510		0		0		0						0									0		0		0
				1512		0		0		0						0									0		0		0
				1514		0		0		0						0									0		0		0
				1516		0		0		0						0									0		0		0
				1518		0		0		0						0									0		0		0
				1520		0		0		0						0									0		0		0
				1522		0		0		0						0									0		0		0
				1524		0		0		0						0									0		0		0
				1526		0		0		0						0									0		0		0
				1528		0		0		0						0									0		0		0
				1530		0		0		0						0									0		0		0
				1532		0		0		0						0									0		0		0
				1534		0		0		0						0									0		0		0
				1536		0		0		0						0									0		0		0
				1538		0		0		0						0									0		0		0
				1540		0		0		0						0									0		0		0
				1542		0		0		0						0									0		0		0
				1544		0		0		0						0									0		0		0
				1546		0		0		0						0									0		0		0
				1548		0		0		0						0									0		0		0
				1550		0		0		0						0									0		0		0
				1552		0		0		0						0									0		0		0
				1554		0		0		0						0									0		0		0
				1556		0		0		0						0									0		0		0
				1558		0		0		0						0									0		0		0
				1560		0		0		0						0									0		0		0
				1562		0		0		0						0									0		0		0
				1564		0		0		0						0									0		0		0
				1566		0		0		0						0									0		0		0
				1568		0		0		0						0									0		0		0
				1570		0		0		0						0									0		0		0
				1572		0		0		0						0									0		0		0
				1574		0		0		0						0									0		0		0
				1576		0		0		0						0									0		0		0
				1578		0		0		0						0									0		0		0
				1580		0		0		0						0									0		0		0
				1582		0		0		0						0									0		0		0
				1584		0		0		0						0									0		0		0
				1586		0		0		0						0									0		0		0
				1588		0		0		0						0									0		0		0
				1590		0		0		0						0									0		0		0
				1592		0		0		0						0									0		0		0
				1594		0		0		0						0									0		0		0
				1596		0		0		0						0									0		0		0
				1598		0		0		0						0									0		0		0
				1600		0		0		0						0									0		0		0
				1602		0		0		0						0									0		0		0
				1604		0		0		0						0									0		0		0
				1606		0		0		0						0									0		0		0
				1608		0		0		0						0									0		0		0
				1610		0		0		0						0									0		0		0
				1612		0		0		0						0									0		0		0
				1614		0		0		0						0									0		0		0
				1616		0		0		0						0									0		0		0
				1618		0		0		0						0									0		0		0
				1620		0		0		0						0									0		0		0
				1622		0		0		0						0									0		0		0
				1624		0		0		0						0									0		0		0
				1626		0		0		0						0									0		0		0
				1628		0		0		0						0									0		0		0
				1630		0		0		0						0									0		0		0
				1632		0		0		0						0									0		0		0
				1634		0		0		0						0									0		0		0
				1636		0		0		0						0									0		0		0
				1638		0		0		0						0									0		0		0
				1640		0		0		0						0									0		0		0
				1642		0		0		0						0									0		0		0
				1644		0		0		0						0									0		0		0
				1646		0		0		0						0									0		0		0
				1648		0		0		0						0									0		0		0
				1650		0		0		0						0									0		0		0
				1652		0		0		0						0									0		0		0
				1654		0		0		0						0									0		0		0
				1656		0		0		0						0									0		0		0
				1658		0		0		0						0									0		0		0
				1660		0		0		0						0									0		0		0
				1662		0		0		0						0									0		0		0
				1664		0		0		0						0									0		0		0
				1666		0		0		0						0									0		0		0
				1668		0		0		0						0									0		0		0
				1670		0		0		0						0									0		0		0
				1672		0		0		0						0									0		0		0
				1674		0		0		0						0									0		0		0
				1676		0		0		0						0									0		0		0
				1678		0		0		0						0									0		0		0
				1680		0		0		0						0									0		0		0
				1682		0		0		0						0									0		0		0
				1684		0		0		0						0									0		0		0
				1686		0		0		0						0									0		0		0
				1688		0		0		0						0									0		0		0
				1690		0		0		0						0									0		0		0
				1692		0		0		0						0									0		0		0
				1694		0		0		0						0									0		0		0
				1696		0		0		0						0									0		0		0
				1698		0		0		0						0									0		0		0
				1700		0		0		0						0									0		0		0
				1702		0		0		0						0									0		0		0
				1704		0		0		0						0									0		0		0
				1706		0		0		0						0									0		0		0
				1708		0		0		0						0									0		0		0
				1710		0		0		0						0									0		0		0
				1712		0		0		0						0									0		0		0
				1714		0		0		0						0									0		0		0
				1716		0		0		0						0									0		0		0
				1718		0		0		0						0									0		0		0
				1720		0		0		0						0									0		0		0
				1722		0		0		0						0									0		0		0
				1724		0		0		0						0									0		0		0
				1726		0		0		0						0									0		0		0
				1728		0		0		0						0									0		0		0
				1730		0		0		0						0									0		0		0
				1732		0		0		0						0									0		0		0
				1734		0		0		0						0									0		0		0
				1736		0		0		0						0									0		0		0
				1738		0		0		0						0									0		0		0
				1740		0		0		0						0									0		0		0
				1742		0		0		0						0									0		0		0
				1744		0		0		0						0									0		0		0
				1746		0		0		0						0									0		0		0
				1748		0		0		0						0									0		0		0
				1750		0		0		0						0									0		0		0
				1752		0		0		0						0									0		0		0
				1754		0		0		0						0									0		0		0
				1756		0		0		0						0									0		0		0
				1758		0		0		0						0									0		0		0
				1760		0		0		0						0									0		0		0
				1762		0		0		0						0									0		0		0
				1764		0		0		0						0									0		0		0
				1766		0		0		0						0									0		0		0
				1768		0		0		0						0									0		0		0
				1770		0		0		0						0									0		0		0
				1772		0		0		0						0									0		0		0
				1774		0		0		0						0									0		0		0
				1776		0		0		0						0									0		0		0
				1778		0		0		0						0									0		0		0
				1780		0		0		0						0									0		0		0
				1782		0		0		0						0									0		0		0
				1784		0		0		0						0									0		0		0
				1786		0		0		0						0									0		0		0
				1788		0		0		0						0									0		0		0
				1790		0		0		0						0									0		0		0
				1792		0		0		0						0									0		0		0
				1794		0		0		0						0									0		0		0
				1796		0		0		0						0									0		0		0
				1798		0		0		0						0									0		0		0
				1800		0		0		0						0									0		0		0
				1802		0		0		0						0									0		0		0
				1804		0		0		0						0									0		0		0
				1806		0		0		0						0									0		0		0
				1808		0		0		0						0									0		0		0
				1810		0		0		0						0									0		0		0
				1812		0		0		0						0									0		0		0
				1814		0		0		0						0									0		0		0
				1816		0		0		0						0									0		0		0
				1818		0		0		0						0									0		0		0
				1820		0		0		0						0									0		0		0
				1822		0		0		0						0									0		0		0
				1824		0		0		0						0									0		0		0
				1826		0		0		0						0									0		0		0
				1828		0		0		0						0									0		0		0
				1830		0		0		0						0									0		0		0
				1832		0		0		0						0									0		0		0
				1834		0		0		0						0									0		0		0
				1836		0		0		0						0									0		0		0
				1838		0		0		0						0									0		0		0
				1840		0		0		0						0									0		0		0
				1842		0		0		0						0									0		0		0
				1844		0		0		0						0									0		0		0
				1846		0		0		0						0									0		0		0
				1848		0		0		0						0									0		0		0
				1850		0		0		0						0									0		0		0
				1852		0		0		0						0									0		0		0
				1854		0		0		0						0									0		0		0
				1856		0		0		0						0									0		0		0
				1858		0		0		0						0									0		0		0
				1860		0		0		0						0									0		0		0
				1862		0		0		0						0									0		0		0
				1864		0		0		0						0									0		0		0
				1866		0		0		0						0									0		0		0
				1868		0		0		0						0									0		0		0
				1870		0		0		0						0									0		0		0
				1872		0		0		0						0									0		0		0
				1874		0		0		0						0									0		0		0
				1876		0		0		0						0									0		0		0
				1878		0		0		0						0									0		0		0
				1880		0		0		0						0									0		0		0
				1882		0		0		0						0									0		0		0
				1884		0		0		0						0									0		0		0
				1886		0		0		0						0									0		0		0
				1888		0		0		0						0									0		0		0
				1890		0		0		0						0									0		0		0
				1892		0		0		0						0									0		0		0
				1894		0		0		0						0									0		0		0
				1896		0		0		0						0									0		0		0
				1898		0		0		0						0									0		0		0
				1900		0		0		0						0									0		0		0
				1902		0		0		0						0									0		0		0
				1904		0		0		0						0									0		0		0
				1906		0		0		0						0									0		0		0
				1908		0		0		0						0									0		0		0
				1910		0		0		0						0									0		0		0
				1912		0		0		0						0									0		0		0
				1914		0		0		0						0									0		0		0
				1916		0		0		0						0									0		0		0
				1918		0		0		0						0									0		0		0
				1920		0		0		0						0									0		0		0
				1922		0		0		0						0									0		0		0
				1924		0		0		0						0									0		0		0
				1926		0		0		0						0									0		0		0
				1928		0		0		0						0									0		0		0
				1930		0		0		0						0									0		0		0
				1932		0		0		0						0									0		0		0
				1934		0		0		0						0									0		0		0
				1936		0		0		0						0									0		0		0
				1938		0		0		0						0									0		0		0
				1940		0		0		0						0									0		0		0
				1942		0		0		0						0									0		0		0
				1944		0		0		0						0									0		0		0
				1946		0		0		0						0									0		0		0
				1948		0		0		0						0									0		0		0
				1950		0		0		0						0									0		0		0
				1952		0		0		0						0									0		0		0
				1954		0		0		0						0									0		0		0
				1956		0		0		0						0									0		0		0
				1958		0		0		0						0									0		0		0
				1960		0		0		0						0									0		0		0
				1962		0		0		0						0									0		0		0
				1964		0		0		0						0									0		0		0
				1966		0		0		0						0									0		0		0
				1968		0		0		0						0									0		0		0
				1970		0		0		0						0									0		0		0
				1972		0		0		0						0									0		0		0
				1974		0		0		0						0									0		0		0
				1976		0		0		0						0									0		0		0
				1978		0		0		0						0									0		0		0
				1980		0		0		0						0									0		0		0
				1982		0		0		0						0									0		0		0
				1984		0		0		0						0									0		0		0
				1986		0		0		0						0									0		0		0
				1988		0		0		0						0									0		0		0
				1990		0		0		0						0									0		0		0
				1992		0		0		0						0									0		0		0
				1994		0		0		0						0									0		0		0
				1996		0		0		0						0									0		0		0
				1998		0		0		0						0									0		0		0
				2000		0		0		0						0									0		0		0
				2002		0		0		0						0									0		0		0
				2004		0		0		0						0									0		0		0
				2006		0		0		0						0									0		0		0
				2008		0		0		0						0									0		0		0
				2010		0		0		0						0									0		0		0
				2012		0		0		0						0									0		0		0
				2014		0		0		0						0									0		0		0
				2016		0		0		0						0									0		0		0
				2018		0		0		0						0									0		0		0
				2020		0		0		0						0									0		0		0
				2022		0		0		0						0									0		0		0
				2024		0		0		0						0									0		0		0
				2026		0		0		0						0									0		0		0
				2028		0		0		0						0									0		0		0
				2030		0		0		0						0									0		0		0
				2032		0		0		0						0									0		0		0
				2034		0		0		0						0									0		0		0
				2036		0		0		0						0									0		0		0
				2038		0		0		0						0									0		0		0
				2040		0		0		0						0									0		0		0
				2042		0		0		0						0									0		0		0
				2044		0		0		0						0									0		0		0
				2046		0		0		0						0									0		0		0
				2048		0		0		0						0									0		0		0
				2050		0		0		0						0									0		0		0
				2052		0		0		0						0									0		0		0
				2054		0		0		0						0									0		0		0
				2056		0		0		0						0									0		0		0
				2058		0		0		0						0									0		0		0
				2060		0		0		0						0									0		0		0
				2062		0		0		0						0									0		0		0
				2064		0		0		0						0									0		0		0
				2066		0		0		0						0									0		0		0
				2068		0		0		0						0									0		0		0
				2070		0		0		0						0									0		0		0
				2072		0		0		0						0									0		0		0
				2074		0		0		0						0									0		0		0
				2076		0		0		0						0									0		0		0
				2078		0		0		0						0									0		0		0
				2080		0		0		0						0									0		0		0
				2082		0		0		0						0									0		0		0
				2084		0		0		0						0									0		0		0
				2086		0		0		0						0									0		0		0
				2088		0		0		0						0									0		0		0
				2090		0		0		0						0									0		0		0
				2092		0		0		0						0									0		0		0
				2094		0		0		0						0									0		0		0
				2096		0		0		0						0									0		0		0
				2098		0		0		0						0									0		0		0
				2100		0		0		0						0									0		0		0
				2102		0		0		0						0									0		0		0
				2104		0		0		0						0									0		0		0
				2106		0		0		0						0									0		0		0
				2108		0		0		0						0									0		0		0
				2110		0		0		0						0									0		0		0
				2112		0		0		0						0									0		0		0
				2114		0		0		0						0									0		0		0
				2116		0		0		0						0									0		0		0
				2118		0		0		0						0									0		0		0
				2120		0		0		0						0									0		0		0
				2122		0		0		0						0									0		0		0
				2124		0		0		0						0									0		0		0
				2126		0		0		0						0									0		0		0
				2128		0		0		0						0									0		0		0
				2130		0		0		0						0									0		0		0
				2132		0		0		0						0									0		0		0
				2134		0		0		0						0									0		0		0
				2136		0		0		0						0									0		0		0
				2138		0		0		0						0									0		0		0
				2140		0		0		0						0									0		0		0
				2142		0		0		0						0									0		0		0
				2144		0		0		0						0									0		0		0
				2146		0		0		0						0									0		0		0
				2148		0		0		0						0									0		0		0
				2150		0		0		0						0									0		0		0
				2152		0		0		0						0									0		0		0
				2154		0		0		0						0									0		0		0
				2156		0		0		0						0									0		0		0
				2158		0		0		0						0									0		0		0
				2160		0		0		0						0									0		0		0
				2162		0		0		0						0									0		0		0
				2164		0		0		0						0									0		0		0
				2166		0		0		0						0									0		0		0
				2168		0		0		0						0									0		0		0
				2170		0		0		0						0									0		0		0
				2172		0		0		0						0									0		0		0
				2174		0		0		0						0									0		0		0
				2176		0		0		0						0									0		0		0
				2178		0		0		0						0									0		0		0
				2180		0		0		0						0									0		0		0
				2182		0		0		0						0									0		0		0
				2184		0		0		0						0									0		0		0
				2186		0		0		0						0									0		0		0
				2188		0		0		0						0									0		0		0
				2190		0		0		0						0									0		0		0
				2192		0		0		0						0									0		0		0
				2194		0		0		0						0									0		0		0
				2196		0		0		0						0									0		0		0
				2198		0		0		0						0									0		0		0
				2200		0		0		0						0									0		0		0
				2202		0		0		0						0									0		0		0
				2204		0		0		0						0									0		0		0
				2206		0		0		0						0									0		0		0
				2208		0		0		0						0									0		0		0
				2210		0		0		0						0									0		0		0
				2212		0		0		0						0									0		0		0
				2214		0		0		0						0									0		0		0
				2216		0		0		0						0									0		0		0
				2218		0		0		0						0									0		0		0
				2220		0		0		0						0									0		0		0
				2222		0		0		0						0									0		0		0
				2224		0		0		0						0									0		0		0
				2226		0		0		0						0									0		0		0
				2228		0		0		0						0									0		0		0
				2230		0		0		0						0									0		0		0
				2232		0		0		0						0									0		0		0
				2234		0		0		0						0									0		0		0
				2236		0		0		0						0									0		0		0
				2238		0		0		0						0									0		0		0
				2240		0		0		0						0									0		0		0
				2242		0		0		0						0									0		0		0
				2244		0		0		0						0									0		0		0
				2246		0		0		0						0									0		0		0
				2248		0		0		0						0									0		0		0
				2250		0		0		0						0									0		0		0
				2252		0		0		0						0									0		0		0
				2254		0		0		0						0									0		0		0
				2256		0		0		0						0									0		0		0
				2258		0		0		0						0									0		0		0
				2260		0		0		0						0									0		0		0
				2262		0		0		0						0									0		0		0
				2264		0		0		0						0									0		0		0
				2266		0		0		0						0									0		0		0
				2268		0		0		0						0									0		0		0
				2270		0		0		0						0									0		0		0
				2272		0		0		0						0									0		0		0
				2274		0		0		0						0									0		0		0
				2276		0		0		0						0									0		0		0
				2278		0		0		0						0									0		0		0
				2280		0		0		0						0									0		0		0
				2282		0		0		0						0									0		0		0
				2284		0		0		0						0									0		0		0
				2286		0		0		0						0									0		0		0
				2288		0		0		0						0									0		0		0
				2290		0		0		0						0									0		0		0
				2292		0		0		0						0									0		0		0
				2294		0		0		0						0									0		0		0
				2296		0		0		0						0									0		0		0
				2298		0		0		0						0									0		0		0
				2300		0		0		0						0									0		0		0
				2302		0		0		0						0									0		0		0
				2304		0		0		0						0									0		0		0
				2306		0		0		0						0									0		0		0
				2308		0		0		0						0									0		0		0
				2310		0		0		0						0									0		0		0
				2312		0		0		0						0									0		0		0
				2314		0		0		0						0									0		0		0
				2316		0		0		0						0									0		0		0
				2318		0		0		0						0									0		0		0
				2320		0		0		0						0									0		0		0
				2322		0		0		0						0									0		0		0
				2324		0		0		0						0									0		0		0
				2326		0		0		0						0									0		0		0
				2328		0		0		0						0									0		0		0
				2330		0		0		0						0									0		0		0
				2332		0		0		0						0									0		0		0
				2334		0		0		0						0									0		0		0
				2336		0		0		0						0									0		0		0
				2338		0		0		0						0									0		0		0
				2340		0		0		0						0									0		0		0
				2342		0		0		0						0									0		0		0
				2344		0		0		0						0									0		0		0
				2346		0		0		0						0									0		0		0
				2348		0		0		0						0									0		0		0
				2350		0		0		0						0									0		0		0
				2352		0		0		0						0									0		0		0
				2354		0		0		0						0									0		0		0
				2356		0		0		0						0									0		0		0
				2358		0		0		0						0									0		0		0
				2360		0		0		0						0									0		0		0
				2362		0		0		0						0									0		0		0
				2364		0		0		0						0									0		0		0
				2366		0		0		0						0									0		0		0
				2368		0		0		0						0									0		0		0
				2370		0		0		0						0									0		0		0
				2372		0		0		0						0									0		0		0
				2374		0		0		0						0									0		0		0
				2376		0		0		0						0									0		0		0
				2378		0		0		0						0									0		0		0
				2380		0		0		0						0									0		0		0
				2382		0		0		0						0									0		0		0
				2384		0		0		0						0									0		0		0
				2386		0		0		0						0									0		0		0
				2388		0		0		0						0									0		0		0
				2390		0		0		0						0									0		0		0
				2392		0		0		0															0		0		0
				2394		0		0		0															0		0		0
				2396		0		0		0															0		0		0
				2398		0		0		0															0		0		0
				2400		0		0		0															0		0		0
				2402		0		0		0															0		0		0
				2404		0		0		0															0		0		0
				2406		0		0		0															0		0		0
				2408		0		0		0															0		0		0
				2410		0		0		0															0		0		0
				2412		0		0		0															0		0		0
				2414		0		0		0															0		0		0
				2416		0		0		0															0		0		0
				2418		0		0		0															0		0		0
				2420		0		0		0															0		0		0
				2422		0		0		0															0		0		0
				2424		0		0		0															0		0		0
				2426		0		0		0															0		0		0
				2428		0		0		0															0		0		0
				2430		0		0		0															0		0		0
				2432		0		0		0															0		0		0
				2434		0		0		0															0		0		0
				2436		0		0		0															0		0		0
				2438		0		0		0															0		0		0
				2440		0		0		0															0		0		0
				2442		0		0		0															0		0		0
				2444		0		0		0															0		0		0
				2446		0		0		0															0		0		0
				2448		0		0		0															0		0		0
				2450		0		0		0															0		0		0
				2452		0		0		0															0		0		0
				2454		0		0		0															0		0		0
				2456		0		0		0															0		0		0
				2458		0		0		0															0		0		0
				2460		0		0		0															0		0		0
				2462		0		0		0															0		0		0
				2464		0		0		0															0		0		0
				2466		0		0		0															0		0		0
				2468		0		0		0															0		0		0
				2470		0		0		0															0		0		0
				2472		0		0		0															0		0		0
				2474		0		0		0															0		0		0
				2476		0		0		0															0		0		0
				2478		0		0		0															0		0		0
				2480		0		0		0															0		0		0
				2482		0		0		0															0		0		0
				2484		0		0		0															0		0		0
				2486		0		0		0															0		0		0
				2488		0		0		0															0		0		0
				2490		0		0		0															0		0		0
				2492		0		0		0															0		0		0
				2494		0		0		0															0		0		0
				2496		0		0		0															0		0		0
				2498		0		0		0															0		0		0
				2500		0		0		0															0		0		0
				2502		0		0		0															0		0		0
				2504		0		0		0															0		0		0
				2506		0		0		0															0		0		0
				2508		0		0		0																	0		0
				2510		0		0		0																	0		0
				2512		0		0		0																	0		0
				2514		0		0		0																	0		0
				2516		0		0		0																	0		0
				2518		0		0		0																	0		0
				2520		0		0		0																	0		0
				2522		0		0		0																	0		0
				2524		0		0		0																	0		0
				2526		0		0		0																	0		0
				2528		0		0		0																	0		0
				2530		0		0		0																	0		0
				2532		0		0		0																	0		0
				2534		0		0		0																	0		0
				2536		0		0		0																	0		0
				2538		0		0		0																	0		0
				2540		0		0		0																	0		0
				2542		0		0		0																	0		0
				2544		0		0		0																	0		0
				2546		0		0		0																	0		0
				2548		0		0		0																	0		0
				2550		0		0		0																	0		0
				2552		0		0		0																	0		0
				2554		0		0		0																	0		0
				2556		0		0		0																	0		0
				2558		0		0		0																	0		0
				2560		0		0		0																	0		0
				2562		0		0		0																	0		0
				2564		0				0																	0		0
				2566		0				0																	0		0
				2568		0				0																	0		0
				2570		0				0																	0		0
				2572		0				0																	0		0
				2574		0				0																	0		0
				2576		0				0																	0		0
				2578		0				0																	0		0
				2580		0				0																	0		0
				2582		0				0																	0		0
				2584		0				0																	0		0
				2586		0				0																	0		0
				2588						0																	0		0
				2590						0																	0		0
				2592						0																	0		0
				2594						0																	0		0
				2596						0																	0		0
				2598						0																	0		0
				2600						0																	0		0
				2602						0																	0		0
				2604						0																	0		0
				2606						0																	0		0
				2608						0																	0		0
				2610						0																	0		0
				2612						0																	0		0
				2614						0																	0		0
				2616						0																	0		0
				2618						0																	0		0
				2620						0																	0		0
				2622						0																	0		0
				2624						0																	0		0
				2626						0																	0		0
				2628						0																	0		0
				2630						0																	0		0
				2632						0																	0		0
				2634						0																	0		0
				2636						0																	0		0
				2638						0																	0		0
				2640						0																	0		0
				2642						0																	0		0
				2644						0																	0		0
				2646						0																	0		0
				2648						0																	0		0
				2650						0																	0		0
				2652						0																	0		0
				2654						0																	0		0
				2656						0																	0		0
				2658						0																	0		0
				2660						0																	0		0
				2662						0																	0		0
				2664						0																	0		0
				2666						0																	0		0
				2668						0																	0		0
				2670						0																	0		0
				2672						0																	0		0
				2674						0																	0		0
				2676						0																	0		0
				2678						0																	0		0
				2680						0																	0		0
				2682						0																	0		0
				2684						0																	0		0
				2686						0																	0		0
				2688						0																	0		0
				2690						0																	0		0
				2692						0																	0		0
				2694						0																	0		0
				2696						0																	0		0
				2698						0																	0		0
				2700						0																	0		0
				2702						0																	0		0
				2704						0																	0		0
				2706						0																	0		0
				2708						0																	0		0
				2710						0																	0		0
				2712						0																	0		0
				2714						0																	0		0
				2716						0																	0		0
				2718						0																	0		0
				2720						0																	0		0
				2722						0																	0		0
				2724						0																	0		0
				2726						0																	0		0
				2728						0																	0		0
				2730						0																	0		0
				2732						0																	0		0
				2734						0																	0		0
				2736						0																	0		0
				2738						0																	0		0
				2740						0																	0		0
				2742						0																	0		0
				2744						0																	0		0
				2746						0																	0		0
				2748						0																	0		0
				2750						0																	0		0
				2752						0																	0		0
				2754						0																	0		0
				2756						0																	0		0
				2758						0																	0		0
				2760						0																	0		0
				2762						0																	0		0
				2764						0																	0		0
				2766						0																	0		0
				2768						0																	0		0
				2770						0																	0		0
				2772						0																	0		0
				2774						0																	0		0
				2776						0																	0		0
				2778						0																	0		0
				2780						0																	0		0
				2782						0																	0		0
				2784						0																	0		0
				2786						0																	0		0
				2788						0																	0		0
				2790						0																	0		0
				2792						0																	0		0
				2794						0																	0		0
				2796						0																	0		0
				2798						0																	0		0
				2800						0																	0		0
				2802						0																	0		0
				2804						0																	0		0
				2806						0																	0		0
				2808						0																	0		0
				2810						0																	0		0
				2812						0																	0		0
				2814						0																	0		0
				2816						0																	0		0
				2818						0																	0		0
				2820						0																	0		0
				2822						0																	0		0
				2824						0																	0		0
				2826						0																	0		0
				2828						0																	0		0
				2830						0																	0		0
				2832						0																	0		0
				2834						0																	0		0
				2836						0																	0		0
				2838						0																	0		0
				2840						0																	0		0
				2842						0																	0		0
				2844						0																	0		0
				2846						0																	0		0
				2848						0																	0		0
				2850						0																	0		0
				2852						0																	0		0
				2854						0																	0		0
				2856						0																	0		0
				2858						0																	0		0
				2860						0																	0		0
				2862						0																	0		0
				2864						0																	0		0
				2866						0																	0		0
				2868						0																	0		0
				2870						0																	0		0
				2872						0																	0		0
				2874						0																	0		0
				2876						0																	0		0
				2878						0																	0		0
				2880						0																	0		0
				2882						0																	0		0
				2884						0																	0		0
				2886						0																	0		0
				2888						0																	0		0
				2890						0																	0		0
				2892						0																	0		0
				2894						0																	0		0
				2896						0																	0		0
				2898						0																	0		0
				2900						0																			0
				2902						0																			0
				2904						0																			0
				2906						0																			0
				2908						0																			0
				2910						0																			0
				2912						0																			0
				2914						0																			0
				2916						0																			0
				2918						0																			0
				2920						0																			0
				2922						0																			0
				2924						0																			0
				2926						0																			0
				2928						0																			0
				2930						0																			0
				2932						0																			0
				2934						0																			0
				2936						0																			0
				2938						0																			0
				2940						0																			0
				2942						0																			0
				2944						0																			0
				2946						0																			0
				2948						0																			0
				2950						0																			0
				2952						0																			0
				2954						0																			0
				2956						0																			0
				2958						0																			0
				2960						0																			0
				2962						0																			0
				2964						0																			0
				2966						0																			0
				2968						0																			0
				2970						0																			0
				2972						0																			0
				2974						0																			0
				2976						0																			0
				2978						0																			0
				2980						0																			0
				2982						0																			0
				2984						0																			0
				2986						0																			0
				2988						0																			0
				2990						0																			0
				2992						0																			0
				2994						0																			0
				2996						0																			0
				2998						0																			0
				3000						0																			0
				3002						0																			0
				3004						0																			0
				3006						0																			0
				3008						0																			0
				3010						0																			0
				3012						0																			0
				3014						0																			0
				3016						0																			0
				3018						0																			0
				3020						0																			0
				3022						0																			0
				3024						0																			0
				3026						0																			0
				3028						0																			0
				3030						0																			0
				3032						0																			0
				3034						0																			0
				3036						0																			0
				3038						0																			0
				3040						0																			0
				3042						0																			0
				3044						0																			0
				3046						0																			0
				3048						0																			0
				3050						0																			0
				3052						0																			0
				3054						0																			0
				3056						0																			0
				3058						0																			0
				3060						0																			0
				3062						0																			0
				3064						0																			0
				3066						0																			0
				3068						0																			0
				3070						0																			0
				3072						0																			0
				3074						0																			0
				3076						0																			0
				3078						0																			0
				3080						0																			0
				3082						0																			0
				3084						0																			0
				3086						0																			0
				3088						0																			0
				3090						0																			0
				3092						0																			0
				3094						0																			0
				3096						0																			0
				3098						0																			0
				3100						0																			0
				3102						0																			0
				3104						0																			0
				3106						0																			0
				3108						0																			0
				3110						0																			0
				3112						0																			0
				3114						0																			0
				3116						0																			0
				3118						0																			0
				3120						0																			0
				3122						0																			0
				3124						0																			0
				3126						0																			0
				3128						0																			0
				3130						0																			0
				3132						0																			0
				3134						0																			0
				3136						0																			0
				3138						0																			0
				3140						0																			0
				3142						0																			0
				3144						0																			0
				3146						0																			0
				3148						0																			0
				3150						0																			0
				3152						0																			0
				3154						0																			0
				3156						0																			0
				3158						0																			0
				3160						0																			0
				3162						0																			0
				3164						0																			0
				3166						0																			0
				3168						0																			0
				3170						0																			0
				3172						0																			0
				3174						0																			0
				3176						0																			0
				3178						0																			0
				3180						0																			0
				3182						0																			0
				3184						0																			0
				3186						0																			0
				3188						0																			0
				3190						0																			0
				3192						0																			0
				3194						0																			0
				3196						0																			0
				3198						0																			0
				3200						0																			0
				3202						0																			0
				3204						0																			0
				3206						0																			0
				3208						0																			0
				3210						0																			0
				3212						0																			0
				3214						0																			0
				3216						0																			0
				3218						0																			0
				3220						0																			0
				3222						0																			0
				3224						0																			0
				3226						0																			0
				3228						0																			0
				3230						0																			0
				3232						0																			0
				3234						0																			0
				3236						0																			0
				3238						0																			0
				3240						0																			0
				3242						0																			0
				3244						0																			0
				3246						0																			0
				3248						0																			0
				3250						0																			0
				3252						0																			0
				3254						0																			0
				3256						0																			0
				3258						0																			0
				3260						0																			0
				3262						0																			0
				3264						0																			0
				3266						0																			0
				3268						0																			0
				3270						0																			0
				3272						0																			0
				3274						0																			0
				3276						0																			0
				3278						0																			0
				3280						0																			0
				3282						0																			0
				3284						0																			0
				3286						0																			0
				3288						0																			0
				3290						0																			0
				3292						0																			0
				3294						0																			0
				3296						0																			0
				3298						0
				3300						0
				3302						0
				3304						0
				3306						0
				3308						0
				3310						0
				3312						0
				3314						0
				3316						0
				3318						0
				3320						0
				3322						0
				3324						0
				3326						0
				3328						0
				3330						0
				3332						0
				3334						0
				3336						0
				3338						0
				3340						0
				3342						0
				3344						0
				3346						0
				3348						0
				3350						0
				3352						0
				3354						0
				3356						0
				3358						0
				3360						0
				3362						0
				3364						0
				3366						0
				3368						0
				3370						0
				3372						0
				3374						0
				3376						0
				3378						0
				3380						0
				3382						0
				3384						0
				3386						0
				3388						0
				3390						0
				3392						0
				3394						0
				3396						0
				3398						0
				3400						0
				3402						0
				3404						0
				3406						0
				3408						0
				3410						0
				3412						0
				3414						0
				3416						0
				3418
				3420
				3422
				3424
				3426
				3428
				3430
				3432
				3434
				3436
				3438
				3440
				3442
				3444
				3446
				3448
				3450
				3452
				3454
				3456
				3458
				3460
				3462
				3464
				3466
				3468
				3470
				3472
				3474
				3476
				3478
				3480
				3482
				3484
				3486
				3488
				3490
				3492
				3494
				3496
				3498
				3500
				3502
				3504
				3506
				3508
				3510
				3512
				3514
				3516
				3518
				3520
				3522
				3524
				3526
				3528
				3530
				3532
				3534
				3536
				3538
				3540
				3542
				3544
				3546
				3548
				3550
				3552
				3554
				3556
				3558
				3560
				3562
				3564
				3566
				3568
				3570
				3572
				3574
				3576
				3578
				3580
				3582
				3584
				3586
				3588
				3590
				3592
				3594
				3596
				3598
				3600
				3602
				3604
				3606
				3608
				3610
				3612
				3614
				3616
				3618
				3620
				3622
				3624
				3626
				3628
				3630
				3632
				3634
				3636
				3638
				3640
				3642
				3644
				3646
				3648
				3650
				3652
				3654
				3656
				3658
				3660
				3662
				3664
				3666
				3668
				3670
				3672
				3674
				3676
				3678
				3680
				3682
				3684
				3686
				3688
				3690
				3692
				3694
				3696
				3698
				3700
				3702
				3704
				3706
				3708
				3710
				3712
				3714
				3716
				3718
				3720
				3722
				3724
				3726
				3728
				3730
				3732
				3734
				3736
				3738
				3740
				3742
				3744
				3746
				3748
				3750
				3752
				3754
				3756
				3758
				3760
				3762
				3764
				3766
				3768
				3770
				3772
				3774
				3776
				3778
				3780
				3782
				3784
				3786
				3788
				3790
				3792
				3794
				3796
				3798
				3800
				3802
				3804
				3806
				3808
				3810
				3812
				3814
				3816
				3818
				3820
				3822
				3824
				3826
				3828
				3830
				3832
				3834
				3836
				3838
				3840
				3842
				3844
				3846
				3848
				3850
				3852
				3854
				3856
				3858
				3860
				3862
				3864
				3866
				3868
				3870
				3872
				3874
				3876
				3878
				3880
				3882
				3884
				3886
				3888
				3890
				3892
				3894
				3896
				3898
				3900
				3902
				3904
				3906
				3908
				3910
				3912
				3914
				3916
				3918
				3920
				3922
				3924
				3926
				3928
				3930
				3932
				3934
				3936
				3938
				3940
				3942
				3944
				3946
				3948
				3950
				3952
				3954
				3956
				3958
				3960
				3962
				3964
				3966
				3968
				3970
				3972
				3974
				3976
				3978
				3980
				3982
				3984
				3986
				3988
				3990
				3992
				3994
				3996
				3998
[truncated: 1 more rows]
