# Supplementary material for: Numerical study of hydrodynamic and salinity transport processes in the Pink Beach wetlands of the Liao River estuary, China
Source: Copernicus journal article supplement (doi:10.5194/os-14-437-2018), 2018-06-11
Supplement: Supplementary file 29 [file The simulated salinity concentrations at the five locations.xls]

## Sheet: Salinity at five locations
0	G1	0	G2	0	P1	23.566	P3	0	P5	0
1		0		0		23.5638		0		0
2		0		0		23.4976		0		0
3		0		0		23.3703		0		0
4		0		0		23.2183		0		0
5		0		0		23.025		0		0
6		0		0		22.6087		0		0
7		0		0		22.2294		0		0
8		0		0		21.7461		0		0
9		0		0		21.5339		29.0168		32.5312
10		27.6455		30.6199		21.865		29.0134		32.4753
11		27.5675		30.5455		22.577		29.8253		32.4113
12		27.7732		30.6335		23.6124		29.8989		32.463
13		27.6833		30.553		23.8731		29.3574		32.4717
14		27.6684		30.5527		23.6728		29.0108		32.4865
15		27.6684		30.5527		23.5411		28.9512		32.4875
16		0		0		23.507		0		0
17		0		0		23.5301		0		0
18		0		0		23.6195		0		0
19		0		0		23.613		0		0
20		0		0		23.5069		0		0
21		0		0		23.2533		0		0
22		0		0		23.0975		28.9511		32.4869
23		0		0		23.244		28.9382		32.494
24		0		0		23.4932		29.1012		32.5045
25		0		0		23.7269		29.0165		32.5041
26		0		0		23.6689		29.0005		32.5047
27		0		0		23.5968		0		32.504
28		0		0		23.468		0		0
29		0		0		23.3203		0		0
30		0		0		23.1376		0		0
31		0		0		22.7428		0		0
32		0		0		22.3774		0		0
33		0		0		21.9141		0		0
34		0		0		21.8772		28.9382		32.5036
35		27.6684		30.5403		22.2741		29.1887		32.4282
36		27.6735		30.5182		22.9643		29.8062		32.4054
37		27.788		30.534		23.8564		29.6338		32.4411
38		27.7373		30.5034		23.8197		29.187		32.458
39		27.7353		30.5034		23.6658		28.9904		32.4631
40		0		0		23.5575		28.9749		32.4635
41		0		0		23.5317		0		32.463
42		0		0		23.5713		0		0
43		0		0		23.577		0		0
44		0		0		23.5327		0		0
45		0		0		23.365		0		0
46		0		0		23.0767		0		0
47		0		0		23.0747		0		0
		304.609		336.057		1112.06		554.801		681.951
		27.69		30.5506		23.17		29.2		32.4738
		G1		G2		P1		P3		P5
