# Supplementary material for: Numerical study of hydrodynamic and salinity transport processes in the Pink Beach wetlands of the Liao River estuary, China
Source: Copernicus journal article supplement (doi:10.5194/os-14-437-2018), 2018-06-11
Supplement: Supplementary file 31 [file Velocity of G1.xls]

## Sheet: Velocity
216	16	0.16	0		10	-20	7.22	0	0	0	-25
252	14	0.14	20		30	0	1899-12-31 06:20:00	0.00100595	0.00219657	0.00241596	-5
348	8	0.08	40		50	20		-0.0292467	0.140031	0.143053	15
354	0	0	60		70	40		-0.0637997	0.172214	0.183652	35
212	0	0	80		90	60		-0.0412395	0.112432	0.119757	55
264	8	0.08	100		110	80		0.00354372	0.0107114	0.0112824	75
0	10	0.1	120		130	100		0.0341335	-0.0567022	0.0661833	95
20	10	0.1	140		150	120		0.0450683	-0.100161	0.109833	115
实测是7.25			160		170	140		0.0715657	-0.155771	0.171424	135
			180		190	160		0.0600696	-0.134319	0.147139	155
			200		210	180		0.0379546	-0.116731	0.122746	175
			220		230	200		-0.00476023	-0.0414062	0.0416789	195
			240		250	220		-0.00141213	-0.00151306	0.00206965	215
			260		270	240		0	0	0
			280		290	260		0	0	0
			300					0	0	0
			320					0	0	0
			340					0	0	0
			360					0	0	0
			380					0	0	0
			400					0	0	0
			420					0	0	0
			440					0	0	0
			460					0	0	0
			480					0	0	0
			500					0	0	0
								0	0	0
								0	0	0
								0	0	0
								0	0	0
								0	0	0
								0	0	0
								0	0	0
								0	0	0
								0	0	0
								0	0	0
								0	0	0
								0	0	0
								0	0	0
								0	0	0
								0	0	0
								0	0	0
								0	0	0
								0	0	0
								0	0	0
								0	0	0
								0	0	0
								0	0	0
								0	0	0
								0	0	0
								0	0	0
								0	0	0
								0	0	0
								0	0	0
								0	0	0
								0	0	0
								0	0	0
								0	0	0
								0	0	0
								0	0	0
								0	0	0
								0	0	0
								0	0	0
								0	0	0
								0	0	0
								0	0	0
								0	0	0
								0	0	0
								0	0	0
								0	0	0
								0	0	0
								0	0	0
								0	0	0
								0	0	0
								0	0	0
								0.000634451	0.000590352	0.000866628
								-0.00651773	0.074324	0.0746092
								-0.0721831	0.194624	0.207579
								-0.0544077	0.154495	0.163795
								-0.0245703	0.0791062	0.0828341
								0.0257777	-0.0409895	0.0484214
								0.052742	-0.0966175	0.110076
								0.0569906	-0.129389	0.141384
								0.0786975	-0.174264	0.19121
								0.0639813	-0.148038	0.161273
								0.0382761	-0.123631	0.129421
								-0.0117188	-0.0365894	0.0384202
								-0.00131353	-0.00112163	0.00172726
								0	0	0
								0	0	0
								0	0	0
								0	0	0
								0	0	0
								0	0	0
								0	0	0
								0	0	0
								0	0	0
								0	0	0
								0	0	0
								0	0	0
								0	0	0
								0	0	0
								0	0	0
								0	0	0
								0	0	0
								0	0	0
								0	0	0
								0	0	0
								0	0	0
								0	0	0
								0	0	0
								0	0	0
								0	0	0
								0	0	0
								0	0	0
								0	0	0
								0	0	0
								0	0	0
								0	0	0
								0	0	0
								0	0	0
								0	0	0
								0	0	0
								0	0	0
								0	0	0
								0	0	0
								0	0	0
								0	0	0
								0	0	0
								0	0	0
								0	0	0
								0	0	0
								0	0	0
								0	0	0
								0	0	0
								0	0	0
								0	0	0
								0	0	0
								0	0	0
								0	0	0
