# Supplementary material for: Numerical study of hydrodynamic and salinity transport processes in the Pink Beach wetlands of the Liao River estuary, China
Source: Copernicus journal article supplement (doi:10.5194/os-14-437-2018), 2018-06-11
Supplement: Supplementary file 33 [file Velocity of different vegetation density.xls]

## Sheet: Suaeda heteroptera
0	无植被	-0.0676594	-0.0755431	0.101413	翅碱蓬200株2Cd	new	-0.0490709	-0.0594424	0.0770802	2Cd	-0.0431577	-0.0547814	0.0697394
20		0.30656	0.491339	0.579131		200	0.178312	0.292412	0.342491	400	0.135243	0.227036	0.264265
40		0.425462	0.749186	0.861567			0.265999	0.459256	0.530727		0.207704	0.362193	0.417522
60		0.509735	0.902654	1.03664			0.329278	0.558439	0.648289		0.261116	0.442083	0.513438
80		0.513559	0.978839	1.10538			0.357893	0.624828	0.720068		0.293079	0.497488	0.577399
100		0.485945	0.922303	1.04249			0.351152	0.592815	0.689012		0.291741	0.471661	0.554596
120		0.442159	0.83875	0.948159			0.328118	0.53834	0.630453		0.277081	0.426586	0.508674
140		0.41565	0.777799	0.881894			0.314578	0.507426	0.597026		0.26834	0.401839	0.483199
160		0.372819	0.685558	0.780374			0.295728	0.459008	0.546025		0.256175	0.364014	0.44512
180		0.307363	0.581618	0.657839			0.254385	0.403074	0.476634		0.223872	0.322551	0.392629
200		0.253378	0.480232	0.542976			0.216432	0.339937	0.402989		0.193012	0.273377	0.334647
220		0.192801	0.364007	0.411914			0.163867	0.251937	0.300541		0.145361	0.197873	0.245527
240		0.109322	0.219025	0.244792			0.0899691	0.133934	0.161347		0.0769729	0.0940258	0.121514
260		0.0267119	0.0839919	0.0881372			0.0162737	0.0215348	0.0269922		0.00805783	-0.00687435	0.0105918
280		-0.0211981	-0.0125286	0.0246237			-0.0334196	-0.0696145	0.0772208		-0.0401095	-0.0915281	0.0999308
300		-0.0862221	-0.135595	0.160687			-0.0958026	-0.174941	0.199455		-0.0958826	-0.178374	0.202511
320		-0.17116	-0.261346	0.312406			-0.161146	-0.255419	0.302005		-0.146221	-0.23263	0.274768
340		-0.224553	-0.318157	0.38942			-0.193893	-0.275149	0.336603		-0.168919	-0.239081	0.292734
360		-0.249249	-0.346104	0.426513			-0.207876	-0.290165	0.356943		-0.179105	-0.25065	0.308065
380		-0.268475	-0.354348	0.444569			-0.216284	-0.290611	0.362262		-0.18434	-0.249553	0.310255
400		-0.278478	-0.352114	0.448926			-0.216845	-0.281159	0.355066		-0.183162	-0.239911	0.301837
420		-0.292309	-0.362225	0.465458			-0.222341	-0.284028	0.360704		-0.186979	-0.241838	0.305691
440		-0.315326	-0.390572	0.501973			-0.235789	-0.301636	0.382859		-0.197307	-0.255678	0.322957
460		-0.336415	-0.423989	0.541241			-0.24769	-0.321514	0.405859		-0.206238	-0.27081	0.3404
480		-0.355995	-0.456764	0.579108			-0.257078	-0.339131	0.425557		-0.213268	-0.283776	0.354982
500		-0.379418	-0.498824	0.626724			-0.271532	-0.362313	0.45277		-0.224787	-0.301004	0.375676
520		-0.386425	-0.537064	0.661636			-0.270469	-0.383271	0.469095		-0.222813	-0.316383	0.386967
540		-0.402184	-0.560101	0.68954			-0.278111	-0.394443	0.482629		-0.227907	-0.324048	0.396168
560		-0.407039	-0.564419	0.69588			-0.282398	-0.389015	0.480709		-0.230945	-0.318593	0.393493
580		-0.402543	-0.560631	0.69018			-0.274598	-0.378671	0.467756		-0.224767	-0.307321	0.380745
600		-0.393025	-0.550281	0.676223			-0.260932	-0.367682	0.450861		-0.211853	-0.298223	0.365812

## Sheet: Phragmites communis
0	Non	-2.15769e-05	-0.000113794	0.000115822	65	-5.21351e-05	-8.92618e-05	0.000103372	130	-4.62084e-05	-8.43844e-05	9.62078e-05
20		0.000397667	5.92235e-05	0.000402053		0.000448308	1.27317e-05	0.000448489		0.00045079	-4.38094e-06	0.000450811
40		0.000204571	9.40968e-05	0.000225174		0.000202364	9.23212e-05	0.000222428		0.000195258	9.01232e-05	0.000215053
60		-0.00564961	0.0503056	0.0506218		-0.00668145	0.0517493	0.0521788		-0.00728451	0.0524742	0.0529774
80		-0.0246142	0.0942147	0.0973769		-0.0258012	0.0959267	0.099336		-0.0263164	0.0965887	0.10011
100		0.0164695	0.216437	0.217063		0.0134485	0.194363	0.194828		0.00579854	0.190406	0.190494
120		0.00344266	0.437778	0.437792		0.0297243	0.280885	0.282453		0.0276993	0.261089	0.262554
140		-0.00449289	0.658674	0.658689		0.0286433	0.414967	0.415954		0.0338769	0.384208	0.385699
160		0.0381014	0.70285	0.703882		0.0683009	0.431108	0.436485		0.0739042	0.394498	0.401361
180		0.033612	0.673557	0.674395		0.0646742	0.411709	0.416758		0.0704959	0.375633	0.382191
200		0.0406349	0.580268	0.581689		0.0768385	0.350811	0.359127		0.0842656	0.319944	0.330855
220		0.00383567	0.478592	0.478607		0.035989	0.276826	0.279156		0.0433257	0.250831	0.254545
240		-0.0198127	0.296526	0.297187		0.00267862	0.145865	0.14589		0.00637857	0.130927	0.131082
260		-0.0295984	0.097901	0.102277		-0.0155966	1.5975e-05	0.0155966		-0.0149265	-0.000946572	0.0149565
280		-0.0481362	-0.0227253	0.0532309		-0.0418565	-0.0754793	0.0863081		-0.0416491	-0.0662204	0.0782291
300		-0.0740418	-0.233076	0.244554		-0.072558	-0.196526	0.209493		-0.0738619	-0.1737	0.188752
320		-0.0664995	-0.428715	0.433842		-0.0743442	-0.28338	0.29297		-0.0775865	-0.252315	0.263974
340		-0.0615704	-0.442727	0.446988		-0.072747	-0.275345	0.284793		-0.0753157	-0.248702	0.259856
360		-0.0667394	-0.414794	0.420129		-0.0763219	-0.26535	0.276108		-0.0775648	-0.244591	0.256595
380		-0.0764045	-0.39641	0.403706		-0.0822425	-0.250704	0.263849		-0.0815629	-0.231242	0.245205
400		-0.0440704	-0.350836	0.353593		-0.051633	-0.220858	0.226813		-0.0524581	-0.207042	0.213584
420		-0.0391023	-0.257537	0.260489		-0.0392623	-0.152395	0.157371		-0.0361655	-0.14371	0.148191
440		-0.0238856	-0.219899	0.221192		-0.0429237	-0.128091	0.135092		-0.0413983	-0.120337	0.127259
460		-0.00661215	-0.137542	0.137701		-0.0217567	-0.121342	0.123277		-0.0203126	-0.116832	0.118585
480		-0.000606338	-0.112657	0.112659		-0.00708084	-0.0980915	0.0983467		-0.00657901	-0.0984639	0.0986834
500		-0.0154814	-0.0781565	0.079675		-0.00694768	-0.0832228	0.0835123		-0.00447676	-0.0860486	0.086165
520		0.00556603	-0.0686034	0.0688288		0.00631092	-0.0735899	0.07386		0.0061382	-0.0777386	0.0779806
540		0.0119419	-0.0434237	0.0450358		0.0134292	-0.0476462	0.0495026		0.0142954	-0.0495204	0.0515425
560		0.0129119	-0.037947	0.0400836		0.0150711	-0.0420726	0.0446905		0.0159656	-0.0438589	0.0466744
580		0.0101895	-0.0342431	0.035727		0.0128034	-0.0389552	0.0410053		0.0138864	-0.0409989	0.0432867
600		0.00662858	-0.0306082	0.0313177		0.0096327	-0.0354708	0.0367555		0.0109414	-0.0375434	0.0391053
