# Supplementary material for: Numerical study of hydrodynamic and salinity transport processes in the Pink Beach wetlands of the Liao River estuary, China
Source: Copernicus journal article supplement (doi:10.5194/os-14-437-2018), 2018-06-11
Supplement: Supplementary file [file os-14-437-2018-supplement-title-page.pdf › os-14-437-2018-supplement-title-page.pdf]

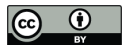

## *Supplement of*

# **Numerical study of hydrodynamic and salinity transport processes in the Pink Beach wetlands of the Liao River estuary, China**

**Huiting Qiao et al.**

*Correspondence to:* Mingliang Zhang (zhmliang\_mail@126.com)

- os-14-437-2018-supplement-title-page.pdf
- Supplement
  - Comparison of salinity
    - \* Salinity.xls
  - Comparison of velocity
    - \* Neap tide
    - \* Spring tide
  - Comparison of water level
    - \* H1.xls
    - \* H2.xls
  - Salinity and depth of G1.xls
  - Salinity and depth of G2.xls
  - Simulated salinity under different runoff conditions of G1 and G2.xls
  - The simulated salinity concentrations at the five locations.xls
  - Velocity of G1.xls
  - Velocity of different vegetation density.xls

The copyright of individual parts of the supplement might differ from the CC BY 4.0 License.
